# Supplementary material
Source: MDPI journal article supplement (https://www.mdpi.com/2304-6740/6/4/135)
Supplement: s1 [file s1]

Archive with 4 entries (4 files):
- Hg2(dca)2.cif
- Hg2(dca)2_checkcif.pdf
- Tl(dca).cif
- Tl(dca)_checkcif.pdf
