# Supplementary material
Source: MDPI journal article supplement (https://www.mdpi.com/2304-6740/6/4/135)
Supplement: s1 [file s1 › Hg2(dca)2.cif]

#=======================================================================
data_global
#=======================================================================

_audit_creation_method                   'Jana2006 Version : 25/10/2015'

#=======================================================================

# AUTHOR LIST

loop_
_publ_author_name
_publ_author_address

'Markus Mann'
;     Institute of Inorganic Chemistry 
      RWTH Aachen University 
      Landoltweg 1 
      52056 Aachen
      Germany
;
'Olaf Reckeweg'
;     Institute of Inorganic Chemistry 
      RWTH Aachen University 
      Landoltweg 1 
      52056 Aachen
      Germany
;
'Nils N\"othling'
;     Max-Planck-Institut f\"ur Kohlenforschung
      Kaiser-Wilhelm-Platz 1
      45470 M\"ulheim an der Ruhr
      Germany
;
'Richard Goddard'
;     Max-Planck-Institut f\"ur Kohlenforschung
      Kaiser-Wilhelm-Platz 1
      45470 M\"ulheim an der Ruhr
      Germany
;
'Richard Dronskowski'
;     Institute of Inorganic Chemistry 
      RWTH Aachen University 
      Landoltweg 1 
      52056 Aachen
      Germany
;

#=======================================================================
data_I
#=======================================================================

# 5. CHEMICAL DATA

_chemical_name_common                    'mercury dicyanamide'
_chemical_name_systematic 		         'di-mercury(I) bis-dicyanamide'
_chemical_formula_moiety                 '2(C2 N3), 2(Hg)'
_chemical_formula_structural             'Hg2 (N (C N)2)2'
_chemical_formula_sum                    'C4 Hg2 N6'
_chemical_formula_weight                 533.3
_chemical_absolute_configuration         .

#=======================================================================

# 6. CRYSTAL DATA

_symmetry_cell_setting                   triclinic
_symmetry_space_group_name_H-M           'P -1'
_symmetry_space_group_name_Hall          '-P 1'
_symmetry_Int_Tables_number              2

loop_
 _space_group_symop_id
 _space_group_symop_operation_xyz
 1   x,y,z
 2   -x,-y,-z

_cell_length_a                           3.7089(5)
_cell_length_b                           6.4098(6)
_cell_length_c                           8.150(6)
_cell_angle_alpha                        81.575(6)
_cell_angle_beta                         80.379(7)
_cell_angle_gamma                        80.195(7)
_cell_volume                             186.84(14)
_cell_formula_units_Z                    1
_cell_measurement_reflns_used            15340
_cell_measurement_theta_min              2.55
_cell_measurement_theta_max              33.91
_cell_measurement_temperature            100(2)

_exptl_crystal_density_diffrn            4.7393
_exptl_crystal_density_meas              ?
_exptl_crystal_density_method            'not measured'
_exptl_crystal_F_000                     226
_exptl_absorpt_coefficient_mu            41.09
_exptl_crystal_description               block
_exptl_crystal_size_max                  0.170
_exptl_crystal_size_mid                  0.080
_exptl_crystal_size_min                  0.020
_exptl_crystal_colour                    colorless
_exptl_absorpt_correction_type           gaussian 
_exptl_absorpt_process_details
;
STOE X-Red32, absorption correction by Gaussian integration, analogous to
P. Coppens, "The Evaluation of Absorption and Extinction in Single-Crystal
Structure Analysis", published in: F. R. Ahmed (Editor), "Crystallographic
Computing", Munksgaard, Copenhagen (1970), 255 - 270.
Afterwards scaling of reflection intensities was performed within STOE LANA.
J. Koziskova, F. Hahn, J. Richter, J. Kozisek, "Comparison of different
absorption corrections on the model structure of tetrakis(\m~2~-acetato)-
diaqua-di-copper(II)", Acta Chimica Slovaca, vol. 9, no. 2, 2016, pp. 136 - 140.
;
_exptl_absorpt_correction_T_min          0.0672
_exptl_absorpt_correction_T_max          0.6730
loop_
    _exptl_crystal_face_index_h
    _exptl_crystal_face_index_k
    _exptl_crystal_face_index_l
    _exptl_crystal_face_perp_dist
   1   4   3  0.0140
  -1  -4  -3  0.0090
   5  -2  -4  0.0700
  -3   1   2  0.1000
   1   3   6  0.0070
  -1  -3  -6  0.0040
   1   0   6  0.0130
  -1   0  -5  0.0170

#=======================================================================

# 7. EXPERIMENTAL DATA

_diffrn_ambient_temperature              100
_diffrn_source                           'Genix Mo'
_diffrn_source_power                     0.050
_diffrn_source_voltage                   50
_diffrn_source_current                   1.000
_diffrn_radiation_type                   MoK\a
_diffrn_radiation_probe                  X-ray
_diffrn_radiation_wavelength             0.71073
_diffrn_radiation_monochromator          'Graded multilayer mirror'
_diffrn_radiation_polarisn_norm          270
_diffrn_radiation_collimation            '0.6 mm diameter'
_diffrn_measurement_device               '4-circle diffractometer'
_diffrn_measurement_device_type          'STOE STADIVARI'
_diffrn_detector_type                    'Dectris Pilatus 200K'
_diffrn_detector                         'Hybrid Pixel Counting Detector'
_diffrn_detector_area_resol_mean         5.81
_diffrn_measurement_method               'rotation method, \w scans'
_diffrn_measurement_details              '2556 frames, detector distance = 55 mm'

_diffrn_reflns_number                    3671
_diffrn_reflns_theta_min                 2.56
_diffrn_reflns_theta_max                 33.97
_diffrn_reflns_theta_full                32.84
_diffrn_measured_fraction_theta_max      0.92
_diffrn_measured_fraction_theta_full     0.98
_diffrn_reflns_av_R_equivalents          0.0543
_diffrn_reflns_av_unetI/netI             0.014
_diffrn_reflns_limit_h_min               -5
_diffrn_reflns_limit_h_max               5
_diffrn_reflns_limit_k_min               -9
_diffrn_reflns_limit_k_max               9
_diffrn_reflns_limit_l_min               -12
_diffrn_reflns_limit_l_max               12
_diffrn_reflns_reduction_process         ?

_diffrn_standards_number                 ?
_diffrn_standards_interval_count         ?
_diffrn_standards_interval_time          ?
_diffrn_standards_decay_%                ?
loop_
_diffrn_standard_refln_index_h
_diffrn_standard_refln_index_k
_diffrn_standard_refln_index_l
  ? ? ?

_computing_cell_refinement               'X-Area Receipe 1.33.0.0 (Stoe, 2015)'
_computing_data_collection               'X-Area Pilatus3_SV 1.31.131.0 (Stoe 2017)'
_computing_data_reduction                'X-Area Integrate 1.71.0.0 (Stoe, 2016); X-Area X-Red 1.63.2.0 (STOE, 2017)'
_computing_publication_material
;
STOE & Cie GmbH, X-Area, software package for collecting single-crystal or
multi-domain crystal data on STOE area-detector diffractometers, for image
processing, for the correction and scaling of reflection intensities and
for outlier rejection, version 1.77, Darmstadt 2016
;
#=======================================================================

# 8. REFINEMENT DATA

_refine_special_details                  'Crystal mounted an a glas fibre'

_reflns_number_total                     1263
_reflns_number_gt                        1154
_reflns_threshold_expression             'I>3\s(I)'

_refine_ls_structure_factor_coef         Fsqd
_refine_ls_R_factor_gt                   0.0468
_refine_ls_wR_factor_gt                  0.1088
_refine_ls_R_factor_all                  0.0492
_refine_ls_wR_factor_ref                 0.1091
_refine_ls_goodness_of_fit_ref           3.60
_refine_ls_goodness_of_fit_gt            3.77
_refine_ls_restrained_S_gt               ?
_refine_ls_restrained_S_all              ?
_refine_ls_number_reflns                 1263
_refine_ls_number_parameters             55
_refine_ls_number_restraints             0
_refine_ls_number_constraints            0
_refine_ls_weighting_scheme              sigma
_refine_ls_weighting_details             'w=1/(\s^2^(I)+0.0004I^2^)'
_refine_ls_shift/su_max                  0.0035
_refine_ls_shift/su_mean                 0.0004
_refine_diff_density_max                 ?
_refine_diff_density_min                 ?
_refine_ls_extinction_method             'none'
_refine_ls_extinction_coef               ?
_refine_ls_abs_structure_details         ?
_refine_ls_abs_structure_Flack           ?
_refine_ls_abs_structure_Rogers          ?

loop_
 _atom_type_symbol
 _atom_type_scat_dispersion_real
 _atom_type_scat_dispersion_imag
 _atom_type_scat_source
 C    0.0034  0.0017
 'International Tables Vol C tables 4.2.6.8 and 6.1.1.1'
 Hg  -2.4444  9.3726
 'International Tables Vol C tables 4.2.6.8 and 6.1.1.1'
 N    0.0067  0.0035
 'International Tables Vol C tables 4.2.6.8 and 6.1.1.1'

#=======================================================================

# 9. ATOMIC COORDINATES AND DISPLACEMENT PARAMETERS

loop_
 _atom_site_label
 _atom_site_type_symbol
 _atom_site_fract_x
 _atom_site_fract_y
 _atom_site_fract_z
 _atom_site_adp_type
 _atom_site_U_iso_or_equiv
 _atom_site_site_symmetry_multiplicity
 _atom_site_occupancy
 _atom_site_calc_flag
 _atom_site_refinement_flags
 _atom_site_disorder_assembly
 _atom_site_disorder_group
  Hg1 Hg 0.96205(10) 0.90300(6) 0.14632(4) Uani 0.01463(12) 2 1 d . . .
  N1 N 0.923(3) 0.805(2) 0.4137(12) Uani 0.024(3) 2 1 d . . .
  N2 N 0.619(3) 0.7427(15) 0.7062(10) Uani 0.015(2) 2 1 d . . .
  N3 N 0.406(3) 0.4138(17) 0.8391(12) Uani 0.020(3) 2 1 d . . .
  C1 C 0.765(3) 0.7693(19) 0.5460(13) Uani 0.016(3) 2 1 d . . .
  C2 C 0.510(3) 0.559(2) 0.7710(14) Uani 0.018(3) 2 1 d . . .

loop_
 _atom_site_aniso_label
 _atom_site_aniso_type_symbol
 _atom_site_aniso_U_11
 _atom_site_aniso_U_22
 _atom_site_aniso_U_33
 _atom_site_aniso_U_12
 _atom_site_aniso_U_13
 _atom_site_aniso_U_23
 Hg1 Hg 0.01303(19) 0.0173(2) 0.01206(19) -0.00301(13) 0.00010(12) 0.00189(13)
 N1 N 0.026(5) 0.038(6) 0.011(4) -0.014(4) 0.005(3) -0.012(4)
 N2 N 0.023(4) 0.012(4) 0.009(3) 0.001(3) -0.001(3) -0.004(3)
 N3 N 0.025(5) 0.018(5) 0.018(4) -0.005(4) -0.002(3) -0.006(3)
 C1 C 0.008(4) 0.022(5) 0.018(4) -0.005(4) 0.000(3) 0.000(4)
 C2 C 0.006(4) 0.027(6) 0.020(5) -0.002(4) 0.004(3) -0.010(4)

#=======================================================================

# 10. MOLECULAR GEOMETRY

loop_
 _geom_bond_atom_site_label_1
 _geom_bond_atom_site_label_2
 _geom_bond_site_symmetry_1
 _geom_bond_site_symmetry_2
 _geom_bond_distance
 _geom_bond_publ_flag
  Hg1 Hg1 . 2_775 2.518(3) ?
  Hg1 N1 . . 2.166(10) ?
  N1 C1 . . 1.148(14) ?
  N2 C2 . . 1.317(16) ?
  N2 C1 . . 1.325(13) ?
  N3 C2 . . 1.108(16) ?

loop_
 _geom_angle_atom_site_label_1
 _geom_angle_atom_site_label_2
 _geom_angle_atom_site_label_3
 _geom_angle_site_symmetry_1
 _geom_angle_site_symmetry_2
 _geom_angle_site_symmetry_3
 _geom_angle
 _geom_angle_publ_flag
  Hg1 Hg1 N1 2_775 . . 166.6(4) ?
  Hg1 N1 C1 . . . 154.1(10) ?
  C2 N2 C1 . . . 119.4(10) ?
  N2 C2 N3 . . . 173.2(13) ?
  N1 C1 N2 . . . 171.6(14) ?

#=======================================================================

# 11. STRUCTURE-FACTOR LIST

loop_
 _refln_index_h
 _refln_index_k
 _refln_index_l
 _refln_F_squared_calc
 _refln_F_squared_meas
 _refln_F_squared_sigma
 _refln_observed_status
   1   0   0 14560.70 16063.60    26.57 o
   2   0   0 11037.20 12244.00    32.47 o
   3   0   0  3974.16  4607.74    38.37 o
   4   0   0  1425.36  1469.99    32.47 o
   5   0   0   297.64   298.13    26.57 o
  -5   1   0  1554.18  1644.15    41.33 o
  -4   1   0  3055.83  3111.19    38.37 o
  -3   1   0  7573.98  8034.77    56.08 o
  -2   1   0  9249.21 10638.30    41.33 o
  -1   1   0 26341.20 25642.20    64.94 o
   1   1   0  7522.96  8205.98    20.66 o
   2   1   0  2418.83  2786.49    14.76 o
   3   1   0   363.44   398.49    14.76 o
   4   1   0     0.06     0.00     8.86 <
   5   1   0   154.29   150.54    23.61 o
  -5   2   0  1491.32  1455.23    41.33 o
  -4   2   0  3327.00  3946.54    41.33 o
  -3   2   0  3669.24  4262.38    41.33 o
  -2   2   0  7023.58  7161.04    35.42 o
   1   2   0    46.72    50.18     5.90 o
   2   2   0   254.18   324.70     8.86 o
   3   2   0   979.44  1130.54    35.42 o
   4   2   0  1414.89  1328.31    32.47 o
   5   2   0  1433.72  1472.94    41.33 o
  -4   3   0   897.95  1006.56    23.61 o
  -3   3   0  1100.02  1183.67    23.61 o
  -2   3   0   244.11   171.20    11.81 o
  -1   3   0   117.25   115.12     8.86 o
   1   3   0  2605.28  2458.84    23.61 o
   2   3   0  4285.12  4415.88    26.57 o
   3   3   0  4427.61  4935.39    47.23 o
   4   3   0  3303.30  3311.91    47.23 o
   5   3   0  1876.20  1942.28    41.33 o
  -4   4   0    24.29    20.66    14.76 <
  -3   4   0   107.99   123.97    14.76 o
   2   4   0  7700.48  7010.50    32.47 o
   3   4   0  4730.75  4837.98    47.23 o
   4   4   0  3011.18  3359.14    47.23 o
   5   4   0  1239.08  1284.03    35.42 o
  -4   5   0   403.62   495.90    32.47 o
  -3   5   0  1200.66  1263.37    41.33 o
  -1   5   0  4457.95  3984.92    38.37 o
   1   5   0  7857.73  6647.43    44.28 o
   2   5   0  4196.48  3787.15    29.52 o
   3   5   0  2956.26  2875.04    38.37 o
   4   5   0  1009.82  1071.50    29.52 o
   5   5   0   390.21   371.93    20.66 o
   0   6   0  4644.56  4504.43    56.08 o
   1   6   0  2156.09  2036.74    38.37 o
   2   6   0  1470.90  1307.64    26.57 o
   3   6   0   347.30   357.17    17.71 o
   4   6   0    36.10    29.52    14.76 <
  -2   7   0   874.51   693.67    35.42 o
  -1   7   0  1550.20  1431.62    29.52 o
   0   7   0   516.47   578.55    17.71 o
   1   7   0   181.15   203.67    17.71 o
   2   7   0     0.52     2.95     8.86 <
   3   7   0   153.42   159.40    14.76 o
   4   7   0   291.09   280.42    20.66 o
  -2   8   0   221.97   206.62    32.47 o
  -1   8   0    11.21    26.57    29.52 <
   0   8   0    57.44    47.23    17.71 <
   1   8   0   322.83   324.70    17.71 o
   2   8   0   724.60   732.04    29.52 o
   3   8   0   922.33   994.75    26.57 o
   0   9   0   699.24   900.30    41.33 o
   1   9   0   993.13  1269.27    38.37 o
   2   9   0  1241.42  1650.05    41.33 o
  -2  -9   1   933.56   714.33    29.52 o
  -1  -9   1  1185.38  1706.13    44.28 o
   0  -9   1  1477.91  1546.74    44.28 o
  -2  -8   1  1972.59  1726.80    38.37 o
  -1  -8   1  2313.93  2154.81    32.47 o
   0  -8   1  1468.43  1726.80    44.28 o
   1  -8   1  1057.86  1263.37    47.23 o
   2  -8   1   491.66   386.68    32.47 o
  -4  -7   1  1866.35  1458.18    35.42 o
  -3  -7   1  2055.13  1647.10    29.52 o
  -2  -7   1  2132.64  1859.63    26.57 o
  -1  -7   1  1280.88  1328.31    26.57 o
   0  -7   1   743.34  1121.68    38.37 o
   1  -7   1   163.98   159.40    20.66 o
   2  -7   1     0.07    -5.90    17.71 <
  -4  -6   1  1223.00  1056.74    32.47 o
  -3  -6   1   972.29   897.34    23.61 o
  -2  -6   1   333.86   250.90    14.76 o
  -1  -6   1    89.27   103.31    11.81 o
   0  -6   1   149.74   147.59    14.76 o
   1  -6   1   453.95   442.77    23.61 o
   2  -6   1  1313.35  1065.60    32.47 o
  -5  -5   1   321.84   374.88    29.52 o
  -4  -5   1   100.37   112.17    14.76 o
  -3  -5   1    69.10    56.08    11.81 o
  -2  -5   1   258.58   230.24     8.86 o
  -1  -5   1  2273.19  1912.76    29.52 o
   3  -5   1  2231.77  2092.82    47.23 o
   4  -5   1  1496.82  1593.97    35.42 o
  -5  -4   1    57.27    50.18    14.76 o
  -4  -4   1   897.91   915.05    23.61 o
  -3  -4   1  1382.32  1499.51    32.47 o
  -1  -4   1  6526.00  5443.10    29.52 o
   1  -4   1  8075.13  7648.09    53.13 o
   3  -4   1  2721.85  2721.55    41.33 o
   4  -4   1  1226.31  1139.39    26.57 o
  -5  -3   1  1480.64  1493.61    32.47 o
  -4  -3   1  2038.89  2019.02    32.47 o
  -3  -3   1  6039.06  6827.49    56.08 o
  -2  -3   1  8111.85  8701.88    38.37 o
  -1  -3   1 11493.40  9876.69    41.33 o
   2  -3   1  3032.97  2547.40    23.61 o
   3  -3   1  1191.85  1340.11    26.57 o
   4  -3   1    79.33   112.17    17.71 o
   5  -3   1     1.63   -11.81    35.42 <
  -5  -2   1  1652.42  1647.10    41.33 o
  -4  -2   1  3907.12  3716.30    47.23 o
  -3  -2   1  5716.10  6564.78    50.18 o
  -2  -2   1  7386.59  9259.77    44.28 o
  -1  -2   1  8519.85  9342.42    35.42 o
   1  -2   1  1434.95  1242.70     8.86 o
   2  -2   1   371.97   368.97     8.86 o
   3  -2   1   150.89   138.73    14.76 o
   4  -2   1   377.17   386.68    17.71 o
   5  -2   1   630.45   593.31    26.57 o
  -5  -1   1  1656.01  1720.89    59.04 o
  -4  -1   1  2418.52  2506.07    41.33 o
  -3  -1   1  2737.40  2875.04    26.57 o
  -2  -1   1  2358.81  2700.89    17.71 o
  -1  -1   1   414.68   448.67     5.90 o
   0  -1   1     4.46     5.90     2.95 <
   1  -1   1   252.80   233.19     5.90 o
   2  -1   1  2377.10  2677.27    20.66 o
   3  -1   1  3145.14  3317.81    23.61 o
   4  -1   1  2654.45  3187.93    44.28 o
   5  -1   1  1642.61  1836.01    38.37 o
  -5   0   1   557.00   546.08    29.52 o
  -4   0   1   448.58   416.20    17.71 o
  -3   0   1    54.50    59.04     5.90 o
  -2   0   1   340.01   433.91     8.86 o
  -1   0   1  2032.91  2361.43     8.86 o
   1   0   1  8634.03  8831.76    20.66 o
   2   0   1 11698.90 12592.30    29.52 o
   3   0   1  7308.37  8087.91    53.13 o
   4   0   1  3976.82  4291.90    53.13 o
   5   0   1  1980.83  1957.04    38.37 o
  -5   1   1     0.58    17.71    14.76 <
  -4   1   1   270.15   283.37    17.71 o
  -3   1   1  1845.84  1933.42    23.61 o
  -2   1   1  4330.86  4959.01    23.61 o
  -1   1   1 13060.20 13950.20    35.42 o
   1   1   1 25179.80 28036.10    29.52 o
   2   1   1 14129.60 16102.00    32.47 o
   3   1   1  6057.10  6558.88    47.23 o
   4   1   1  2815.50  2786.49    32.47 o
   5   1   1  1042.77  1177.76    35.42 o
  -5   2   1   561.71   578.55    35.42 o
  -4   2   1  2292.60  2461.79    41.33 o
  -3   2   1  3887.04  4442.44    38.37 o
  -2   2   1 10443.10 11402.80    35.42 o
   1   2   1 16204.60 16429.70    32.47 o
   2   2   1  4903.33  5354.55    23.61 o
   3   2   1  2073.95  2172.52    38.37 o
   4   2   1   488.64   540.18    23.61 o
   5   2   1     3.81    11.81    17.71 <
  -4   3   1  2132.40  2739.26    50.18 o
  -3   3   1  5006.39  4634.31    53.13 o
  -2   3   1  5512.90  5316.17    35.42 o
   1   3   1  1186.36  1080.36    14.76 o
   2   3   1   221.55   212.53     8.86 o
   3   3   1     4.88     8.86    17.71 <
   4   3   1   499.01   546.08    17.71 o
   5   3   1   449.45   445.72    23.61 o
  -4   4   1  1578.52  1859.63    35.42 o
  -3   4   1  1508.59  1422.76    23.61 o
  -2   4   1  1478.79  1381.44    20.66 o
   0   4   1    23.38    38.37     8.86 o
   1   4   1   717.89   723.19    17.71 o
   2   4   1  1084.75  1012.46    17.71 o
   3   4   1  2558.61  2727.45    32.47 o
   4   4   1  1796.68  1859.63    35.42 o
   5   4   1  1965.34  2143.00    50.18 o
  -4   5   1   184.07   236.14    32.47 o
  -3   5   1    65.85    50.18    20.66 <
  -2   5   1    16.66    44.28    17.71 <
  -1   5   1   743.09   640.54    20.66 o
   0   5   1  2700.31  2379.14    32.47 o
   1   5   1  3034.84  2692.03    26.57 o
   2   5   1  4674.69  4979.67    47.23 o
   3   5   1  3500.20  3462.45    38.37 o
   4   5   1  3028.72  3031.49    44.28 o
   5   5   1  1346.28  1236.80    35.42 o
  -3   6   1   362.44   510.66    35.42 o
  -2   6   1  1145.62   968.19    38.37 o
  -1   6   1  2955.76  2745.17    38.37 o
   0   6   1  3569.60  3621.85    35.42 o
   1   6   1  4430.77  4835.03    56.08 o
   2   6   1  3949.92  3964.25    35.42 o
   3   6   1  3034.99  3069.86    41.33 o
   4   6   1  1327.55  1514.27    32.47 o
  -3   7   1   894.57   646.44    53.13 o
  -2   7   1  1848.02  1797.64    50.18 o
  -1   7   1  2502.83  2503.12    53.13 o
   0   7   1  2550.04  2813.06    50.18 o
   1   7   1  2629.85  2635.95    29.52 o
   2   7   1  1931.66  2213.84    29.52 o
   3   7   1   683.99   717.28    26.57 o
   4   7   1   274.02   259.76    17.71 o
  -2   8   1  1152.31  1289.93    53.13 o
  -1   8   1   937.15  1142.34    50.18 o
   0   8   1   969.23  1151.20    38.37 o
   1   8   1   696.18   870.78    32.47 o
   2   8   1    91.76   153.49    17.71 o
   3   8   1    11.33     2.95    11.81 <
   4   8   1    42.19    -5.90    26.57 <
   0   9   1    86.45   129.88    26.57 o
   1   9   1    33.53    41.33    17.71 <
   2   9   1   108.52   224.34    35.42 o
  -2  -9   2     0.46     5.90    26.57 <
  -1  -9   2   104.55   109.22    23.61 o
   0  -9   2   342.64   321.74    20.66 o
  -3  -8   2   182.41   135.78    17.71 o
  -2  -8   2   613.47   613.97    35.42 o
  -1  -8   2  1414.31  1484.75    35.42 o
   0  -8   2  1554.00  1641.20    38.37 o
   1  -8   2  1656.70  1815.35    44.28 o
  -4  -7   2   651.76   377.83    35.42 o
  -2  -7   2  2854.96  2408.66    47.23 o
  -1  -7   2  3061.62  3167.27    35.42 o
   1  -7   2  2305.62  1980.65    38.37 o
   2  -7   2   984.36   985.90    32.47 o
  -4  -6   2  1678.11  1346.02    35.42 o
  -3  -6   2  3360.96  2748.12    38.37 o
  -1  -6   2  3259.61  3568.71    44.28 o
   0  -6   2  2617.35  2485.41    38.37 o
   1  -6   2   806.66   652.35    23.61 o
   2  -6   2   439.03   398.49    26.57 o
   3  -6   2     6.41    -5.90    17.71 <
  -4  -5   2  2390.58  2311.25    38.37 o
  -3  -5   2  2773.56  2771.73    44.28 o
  -1  -5   2  1248.01  1275.17    23.61 o
   0  -5   2   121.99    70.84    11.81 o
   1  -5   2     2.14    29.52    11.81 <
   2  -5   2   336.17   280.42    20.66 o
   3  -5   2   887.82   791.08    32.47 o
   4  -5   2   721.80   841.26    32.47 o
  -5  -4   2   988.72   932.77    41.33 o
  -4  -4   2   971.79   974.09    29.52 o
  -3  -4   2   368.44   442.77    17.71 o
  -2  -4   2     3.33    29.52    14.76 <
  -1  -4   2   399.78   368.97    11.81 o
   2  -4   2  4009.52  3415.22    29.52 o
   3  -4   2  2972.26  2883.90    35.42 o
   4  -4   2  1820.33  1771.07    32.47 o
  -5  -3   2    65.29    70.84    17.71 o
  -4  -3   2    23.75    29.52    11.81 <
  -3  -3   2   972.60   994.75    26.57 o
  -2  -3   2  2573.61  2759.92    26.57 o
   3  -3   2  3985.84  3937.69    47.23 o
   4  -3   2  1761.58  2175.47    32.47 o
   5  -3   2  1012.10  1201.38    38.37 o
  -5  -2   2   365.01   442.77    29.52 o
  -4  -2   2  2249.44  2506.07    38.37 o
  -3  -2   2  4137.39  5082.98    53.13 o
  -1  -2   2 14746.60 15913.10    47.23 o
   1  -2   2 11956.10 10213.20    29.52 o
   2  -2   2  5926.72  5327.98    20.66 o
   3  -2   2  1799.82  1747.46    23.61 o
   4  -2   2  1163.55  1198.43    32.47 o
   5  -2   2    80.84    88.55    17.71 o
  -5  -1   2  2132.06  2172.52    50.18 o
  -4  -1   2  3462.41  3211.55    41.33 o
  -3  -1   2  6030.80  5428.34    47.23 o
  -2  -1   2 10638.90 10697.30    44.28 o
  -1  -1   2 11268.10 12993.80    53.13 o
   1  -1   2  5561.00  5295.51    17.71 o
   2  -1   2   469.42   522.47     8.86 o
   3  -1   2   553.89   681.86    17.71 o
   4  -1   2    54.74    59.04    11.81 o
   5  -1   2   142.86   118.07    17.71 o
  -5   0   2  1834.90  1812.40    41.33 o
  -4   0   2  2772.78  2836.67    50.18 o
  -3   0   2  4309.59  4356.84    26.57 o
  -2   0   2  4638.18  4749.43    26.57 o
  -1   0   2  2526.53  2464.74    11.81 o
   1   0   2   662.31   811.74     5.90 o
   2   0   2    19.02    14.76     5.90 <
   3   0   2  1317.26  1511.32    23.61 o
   4   0   2  1460.66  1402.10    32.47 o
   5   0   2  1404.54  1393.24    32.47 o
  -5   1   2   832.53   847.16    35.42 o
  -4   1   2   957.22   979.99    32.47 o
  -3   1   2   952.84   941.62    14.76 o
  -2   1   2    53.57    50.18     5.90 o
  -1   1   2     4.07     5.90     2.95 <
   0   1   2  4461.00  4404.07     8.86 o
   1   1   2  1955.18  2145.95    11.81 o
   2   1   2  5413.64  5871.11    20.66 o
   3   1   2  5314.20  5980.33    44.28 o
   4   1   2  3947.40  3908.17    44.28 o
   5   1   2  2095.41  1942.28    38.37 o
  -4   2   2    20.54    23.61    14.76 <
  -3   2   2   337.37   377.83    11.81 o
  -2   2   2  1257.26  1313.55    29.52 o
  -1   2   2  6108.74  5319.13    17.71 o
   1   2   2 11146.50 11990.20    26.57 o
   2   2   2 10838.90 12249.90    41.33 o
   3   2   2  7591.18  7857.67    47.23 o
   4   2   2  3542.40  3884.56    47.23 o
   5   2   2  1524.61  1543.79    35.42 o
  -4   3   2   732.11   856.02    32.47 o
  -3   3   2  2215.65  2237.46    26.57 o
  -2   3   2  5308.05  5215.81    26.57 o
  -1   3   2  8382.37  7373.57    44.28 o
   1   3   2 11876.80 11996.10    29.52 o
   2   3   2  9386.43  9876.69    47.23 o
   3   3   2  3703.19  4055.76    38.37 o
   4   3   2  1185.36  1248.61    20.66 o
   5   3   2   389.66   419.15    29.52 o
  -4   4   2  1747.16  1567.40    35.42 o
  -3   4   2  3183.52  3810.76    47.23 o
  -2   4   2  4850.09  5782.56    47.23 o
   0   4   2  6293.50  5307.32    35.42 o
   1   4   2  5779.13  5265.99    29.52 o
   2   4   2  1892.99  1750.41    20.66 o
   3   4   2   172.41   165.30    11.81 o
   4   4   2    26.12    26.57     8.86 <
   5   4   2   121.61   135.78    17.71 o
  -4   5   2  1325.08  1230.90    47.23 o
  -3   5   2  1728.31  2016.07    44.28 o
  -2   5   2  2378.08  2836.67    41.33 o
  -1   5   2  1629.91  1529.03    23.61 o
   0   5   2  1181.61  1263.37    20.66 o
   1   5   2   181.73   183.01    11.81 o
   2   5   2   370.46   410.30    14.76 o
   3   5   2   302.15   318.79    14.76 o
   4   5   2  1043.58  1018.37    20.66 o
   5   5   2   819.29   735.00    29.52 o
  -3   6   2   397.82   416.20    29.52 o
  -2   6   2   129.07   218.43    20.66 o
  -1   6   2     0.13     8.86    23.61 <
   0   6   2   159.55   180.06    11.81 o
   1   6   2  1949.47  2334.87    26.57 o
   2   6   2  1432.80  1481.80    29.52 o
   3   6   2  2395.07  2606.43    35.42 o
   4   6   2  1773.71  1965.89    35.42 o
   5   6   2  1383.67  1260.41    41.33 o
  -2   7   2   314.04   380.78    38.37 o
  -1   7   2   637.47   870.78    41.33 o
   0   7   2  2549.37  3276.49    53.13 o
   1   7   2  2177.15  2582.82    35.42 o
   2   7   2  2777.72  3128.90    32.47 o
   3   7   2  2164.08  2249.26    29.52 o
   4   7   2  1532.31  1475.90    35.42 o
  -2   8   2   677.43   670.06    53.13 o
  -1   8   2  1784.88  2027.88    44.28 o
   0   8   2  1780.93  2278.78    56.08 o
   1   8   2  1933.20  2423.42    44.28 o
   2   8   2  1546.38  1582.16    32.47 o
   3   8   2  1090.28  1216.14    35.42 o
   0   9   2   873.68  1133.49    32.47 o
   1   9   2   609.60   829.45    35.42 o
   2   9   2   458.58   419.15    26.57 o
  -1  -9   3   398.86   368.97    44.28 o
   0  -9   3   207.52   135.78    20.66 o
  -2  -8   3    63.37    53.13    17.71 <
  -1  -8   3     4.72     0.00    14.76 <
   0  -8   3   103.99    82.65    17.71 o
   1  -8   3   278.69   256.81    26.57 o
   2  -8   3   528.57   422.11    26.57 o
  -3  -7   3    71.24    32.47    14.76 <
  -2  -7   3   271.83   156.45    20.66 o
  -1  -7   3   829.29   820.60    29.52 o
   0  -7   3  1468.46  1703.18    44.28 o
   1  -7   3  1957.61  2027.88    44.28 o
   2  -7   3  1563.50  1419.81    38.37 o
   3  -7   3  1194.26  1030.17    50.18 o
  -4  -6   3   504.72   475.24    32.47 o
  -1  -6   3  3369.37  3193.84    50.18 o
   0  -6   3  4501.90  3984.92    50.18 o
   1  -6   3  3041.92  2857.33    44.28 o
   2  -6   3  2550.85  2128.24    41.33 o
  -4  -5   3  1737.81  1706.13    38.37 o
  -3  -5   3  2981.60  2987.21    50.18 o
  -1  -5   3  6643.54  6334.54    38.37 o
   0  -5   3  3802.66  3217.45    32.47 o
   1  -5   3  3460.83  3645.46    47.23 o
   3  -5   3   427.92   407.35    26.57 o
   4  -5   3    52.19    41.33    23.61 <
  -4  -4   3  2603.92  2686.13    41.33 o
  -3  -4   3  3340.68  3731.06    41.33 o
  -2  -4   3  5848.24  5516.90    53.13 o
   1  -4   3   364.58   295.18    14.76 o
   2  -4   3     3.71    20.66    11.81 <
   3  -4   3    85.63    94.46    23.61 o
   4  -4   3   488.87   528.37    23.61 o
  -4  -3   3  1484.86  1378.49    26.57 o
  -3  -3   3  2671.39  2872.09    35.42 o
  -2  -3   3   731.20   773.37    14.76 o
  -1  -3   3   263.51   233.19    11.81 o
   0  -3   3   141.19   118.07     5.90 o
   2  -3   3  1731.77  1824.21    26.57 o
   3  -3   3  2689.13  2824.86    32.47 o
   4  -3   3  2149.62  2255.17    32.47 o
  -5  -2   3   303.62   283.37    35.42 o
  -4  -2   3   432.07   537.23    29.52 o
  -3  -2   3     5.08    11.81    14.76 <
  -2  -2   3   629.66   752.71    17.71 o
   2  -2   3  8180.75  8022.97    29.52 o
   3  -2   3  5725.42  5670.39    53.13 o
   4  -2   3  2719.02  2892.75    38.37 o
   5  -2   3  1290.96  1254.51    38.37 o
  -5  -1   3     9.09     2.95    20.66 <
  -4  -1   3   510.23   525.42    26.57 o
  -3  -1   3  2488.97  2361.43    26.57 o
  -2  -1   3  6238.00  6074.78    38.37 o
  -1  -1   3 11727.30 12899.30    50.18 o
   1  -1   3 15770.60 14124.30    38.37 o
   2  -1   3  9677.29 10791.70    50.18 o
   3  -1   3  4550.75  4873.41    35.42 o
   4  -1   3  1517.98  1653.00    32.47 o
   5  -1   3   632.60   616.92    26.57 o
  -4   0   3  2800.65  3072.81    50.18 o
  -3   0   3  5949.00  6724.18    64.94 o
  -2   0   3  9353.33  8940.97    41.33 o
  -1   0   3 13522.10 12232.20    23.61 o
   1   0   3  8481.32  8625.13    38.37 o
   2   0   3  4722.41  4811.42    26.57 o
   3   0   3   709.99   729.09    11.81 o
   4   0   3   233.83   212.53    14.76 o
   5   0   3     0.42    -5.90    17.71 <
  -4   1   3  3393.76  3308.96    53.13 o
  -3   1   3  4656.68  5156.78    53.13 o
  -2   1   3  5707.06  6181.05    35.42 o
  -1   1   3  8346.85  8601.52    17.71 o
   0   1   3  2310.92  2095.77     5.90 o
   1   1   3  2182.10  2414.56    11.81 o
   2   1   3    34.31    50.18     2.95 o
   3   1   3   104.64   112.17     8.86 o
   4   1   3   378.08   357.17    20.66 o
   5   1   3   705.21   575.60    26.57 o
  -4   2   3  1563.88  1655.95    41.33 o
  -3   2   3  1246.90  1316.50    29.52 o
  -2   2   3  2027.73  2199.08    20.66 o
  -1   2   3    29.88    32.47     2.95 o
   0   2   3    27.20    32.47     2.95 o
   1   2   3  1892.14  2036.74    11.81 o
   2   2   3  2245.65  2399.81    20.66 o
   3   2   3  2113.59  2098.72    23.61 o
   4   2   3  2568.42  2931.13    35.42 o
   5   2   3  1976.43  1797.64    38.37 o
  -4   3   3    60.45    79.70    14.76 o
  -3   3   3   133.71   109.22    11.81 o
  -2   3   3   414.73   422.11    11.81 o
  -1   3   3   937.52   909.15    11.81 o
   0   3   3  4230.12  4035.10    26.57 o
   1   3   3  6155.70  6815.68    26.57 o
   2   3   3  4977.56  5419.49    29.52 o
   3   3   3  5217.44  5646.77    35.42 o
   4   3   3  3837.79  4510.34    50.18 o
   5   3   3  1607.44  1706.13    41.33 o
  -4   4   3    49.03    59.04    17.71 o
  -3   4   3   882.20   929.81    32.47 o
  -2   4   3  1982.34  2287.64    32.47 o
  -1   4   3  4660.66  3884.56    32.47 o
   0   4   3  7109.44  8787.48    70.84 o
   1   4   3  6714.67  7031.16    35.42 o
   2   4   3  6349.29  6966.23    35.42 o
   3   4   3  4855.73  5174.49    41.33 o
   4   4   3  1843.11  2107.58    35.42 o
   5   4   3   817.64   782.22    29.52 o
  -4   5   3   768.76   572.65    38.37 o
  -3   5   3  1694.64  1720.89    44.28 o
  -2   5   3  3345.69  4167.93    61.99 o
  -1   5   3  4568.67  5661.53    64.94 o
   0   5   3  5160.99  4867.50    61.99 o
   1   5   3  4437.50  4669.73    32.47 o
   2   5   3  3483.92  3648.41    38.37 o
   3   5   3  1189.40  1189.57    35.42 o
   4   5   3   285.62   268.61    17.71 o
   5   5   3     8.16     5.90    17.71 <
  -3   6   3  1649.12  1729.75    44.28 o
  -1   6   3  2204.77  2821.91    61.99 o
   0   6   3  1659.33  1679.57    41.33 o
   1   6   3  1011.47  1050.84    17.71 o
   2   6   3   247.10   245.00    11.81 o
   3   6   3    16.16    35.42    11.81 o
   4   6   3   173.35   194.82    14.76 o
  -2   7   3   458.49   495.90    32.47 o
  -1   7   3   257.21   327.65    23.61 o
   0   7   3    10.64    20.66    17.71 <
   1   7   3    27.87    56.08    11.81 o
   2   7   3   604.94   678.91    23.61 o
   3   7   3   900.57   979.99    29.52 o
   4   7   3   795.37   826.50    29.52 o
  -2   8   3     0.44   -20.66    29.52 <
  -1   8   3   199.66   177.11    23.61 o
   0   8   3   358.18   487.05    20.66 o
   1   8   3  1204.01  1440.47    32.47 o
   2   8   3  1565.00  1316.50    35.42 o
   3   8   3  1168.58  1272.22    32.47 o
   1   9   3  1441.94  1762.22    38.37 o
   2   9   3   987.55   858.97    32.47 o
  -2  -8   4  1700.93  1511.32    41.33 o
  -1  -8   4  1239.61  1337.16    32.47 o
   0  -8   4   564.53   495.90    23.61 o
   1  -8   4   354.90   327.65    26.57 o
  -3  -7   4  1119.18   997.71    38.37 o
  -2  -7   4   757.12   737.95    35.42 o
  -1  -7   4   130.63   159.40    23.61 o
   0  -7   4    33.32    26.57    14.76 <
   1  -7   4    48.42    50.18    17.71 <
   2  -7   4   270.57   227.29    23.61 o
  -3  -6   4   112.69   106.26    17.71 o
  -2  -6   4    73.46    79.70    17.71 o
  -1  -6   4   297.09   262.71    20.66 o
   0  -6   4   836.61   861.92    26.57 o
   1  -6   4  1621.53  1700.23    38.37 o
   2  -6   4  1589.82  1198.43    35.42 o
  -4  -5   4    59.58    76.75    23.61 o
  -3  -5   4   761.33   649.39    29.52 o
  -2  -5   4  1650.97  1351.92    32.47 o
   0  -5   4  4124.80  4091.18    50.18 o
   1  -5   4  4289.42  4409.97    53.13 o
  -4  -4   4  1477.41  1800.59    50.18 o
  -3  -4   4  2790.23  3654.32    64.94 o
  -2  -4   4  4548.92  3807.81    44.28 o
   3  -4   4  1092.90  1136.44    35.42 o
   4  -4   4   363.97   312.89    26.57 o
  -4  -3   4  2526.50  2503.12    44.28 o
  -3  -3   4  4400.53  4953.10    61.99 o
   1  -3   4  2141.06  1818.30    26.57 o
   2  -3   4   648.40   664.15    17.71 o
   3  -3   4    32.14    38.37    14.76 <
   4  -3   4    28.71    32.47    11.81 <
  -4  -2   4  2668.94  2821.91    41.33 o
  -3  -2   4  2317.79  2078.06    26.57 o
  -2  -2   4  3848.88  4288.95    29.52 o
   0  -2   4   297.26   265.66     8.86 o
   1  -2   4     2.28    14.76     5.90 <
   2  -2   4   550.90   492.95    11.81 o
   3  -2   4  1090.64  1018.37    23.61 o
   4  -2   4  1117.58  1127.58    32.47 o
   5  -2   4  1412.93  1469.99    41.33 o
  -4  -1   4   550.77   631.68    29.52 o
  -3  -1   4   784.78   850.12    26.57 o
  -2  -1   4   150.94   129.88     5.90 o
  -1  -1   4   554.69   649.39    17.71 o
   0  -1   4  1643.17  1472.94    14.76 o
   1  -1   4  4202.09  3660.22    17.71 o
   2  -1   4  5623.50  4861.60    29.52 o
   3  -1   4  3911.99  4041.00    32.47 o
   4  -1   4  4017.76  3686.79    38.37 o
   5  -1   4  1492.96  1481.80    38.37 o
  -4   0   4     1.27    -5.90    17.71 <
  -3   0   4   297.21   312.89    17.71 o
  -2   0   4  2684.68  2571.01    23.61 o
  -1   0   4  6181.58  5587.74    14.76 o
   0   0   4  9835.43  8353.57    26.57 o
   1   0   4 13928.60 15803.90    47.23 o
   2   0   4  8407.98  7904.89    32.47 o
   3   0   4  7458.48  7382.43    53.13 o
   4   0   4  2658.36  2656.61    38.37 o
   5   0   4  1109.17  1086.26    32.47 o
  -4   1   4   974.49   903.25    29.52 o
  -3   1   4  3355.73  3241.07    44.28 o
  -2   1   4  7508.10  7479.84    38.37 o
  -1   1   4 10437.50  9870.79    32.47 o
   0   1   4 15820.90 13415.90    23.61 o
   1   1   4 10803.00 10927.50    29.52 o
   2   1   4  8496.14  8822.90    23.61 o
   3   1   4  2775.04  2913.42    26.57 o
   4   1   4   778.45   755.66    20.66 o
   5   1   4   132.99    73.79    17.71 o
  -4   2   4  2331.98  2027.88    32.47 o
  -3   2   4  4887.97  4829.13    56.08 o
  -2   2   4  6199.91  6086.59    41.33 o
  -1   2   4  8000.74  7580.20    23.61 o
   0   2   4  6964.24  6969.18    14.76 o
   1   2   4  4476.58  4610.70    20.66 o
   2   2   4  1087.94  1127.58    14.76 o
   3   2   4    72.13    91.51     5.90 o
   4   2   4    56.01    41.33    11.81 o
   5   2   4   131.77   118.07    17.71 o
  -4   3   4  1989.93  1688.42    38.37 o
  -3   3   4  2370.50  2166.61    29.52 o
  -2   3   4  2055.01  1962.94    32.47 o
  -1   3   4  1932.24  1800.59    23.61 o
   0   3   4   594.27   664.15    11.81 o
   1   3   4    13.45    11.81     5.90 <
   2   3   4   407.98   422.11    11.81 o
   3   3   4  1252.91  1310.59    23.61 o
   4   3   4  1058.40  1171.86    29.52 o
   5   3   4   989.41   971.14    29.52 o
  -4   4   4   562.68   445.72    23.61 o
  -3   4   4   172.92   203.67    17.71 o
  -2   4   4   105.17   103.31    17.71 o
  -1   4   4    58.84    59.04    11.81 o
   0   4   4  1174.98  1278.13    14.76 o
   1   4   4  1972.35  2199.08    20.66 o
   2   4   4  3598.13  4038.05    23.61 o
   3   4   4  2855.56  3176.13    32.47 o
   4   4   4  2023.27  1886.19    35.42 o
   5   4   4  1911.36  1741.56    38.37 o
  -3   5   4    81.60    88.55    14.76 o
  -2   5   4   516.20   684.82    29.52 o
  -1   5   4  2123.43  2423.42    32.47 o
   0   5   4  3003.66  2942.93    23.61 o
   1   5   4  4573.10  4643.17    41.33 o
   2   5   4  4235.25  4454.25    29.52 o
   3   5   4  2523.79  2458.84    35.42 o
   4   5   4  2574.91  2544.44    38.37 o
   5   5   4   826.41   776.32    26.57 o
  -3   6   4   622.55   554.94    26.57 o
  -2   6   4  1776.76  2137.10    47.23 o
  -1   6   4  2629.21  3211.55    53.13 o
   1   6   4  3735.65  3843.23    35.42 o
   2   6   4  1956.05  1983.60    26.57 o
   3   6   4  2135.56  2181.37    35.42 o
   4   6   4   575.36   605.12    26.57 o
  -2   7   4  1519.25  1794.69    35.42 o
  -1   7   4  1544.73  2016.07    41.33 o
   0   7   4  1931.39  2204.99    32.47 o
   1   7   4   878.98   944.57    26.57 o
   2   7   4   898.58   794.03    26.57 o
   3   7   4   146.94   174.16    14.76 o
   4   7   4     6.37    17.71    17.71 <
  -2   8   4   454.59   445.72    41.33 o
  -1   8   4   520.27   693.67    32.47 o
   0   8   4   169.33   194.82    14.76 o
   1   8   4    89.57   121.02    20.66 o
   2   8   4     9.42    14.76    11.81 <
   3   8   4   124.40   123.97    17.71 o
   0   9   4    35.83    35.42    14.76 <
   1   9   4   231.60   212.53    20.66 o
   2   9   4   412.83   469.33    26.57 o
   0  -8   5  1782.37  1968.84    41.33 o
  -2  -7   5  2075.66  2385.05    56.08 o
  -1  -7   5  2377.03  2786.49    50.18 o
   0  -7   5  1845.91  2007.22    41.33 o
   1  -7   5   896.48   891.44    29.52 o
   2  -7   5   356.02   312.89    23.61 o
  -3  -6   5  1843.36  1750.41    50.18 o
  -2  -6   5  1860.27  1853.72    41.33 o
  -1  -6   5  1397.32  1189.57    32.47 o
   0  -6   5   427.86   448.67    23.61 o
   1  -6   5    29.41    17.71    17.71 <
   2  -6   5     0.75     5.90    20.66 <
   3  -6   5   206.98   180.06    23.61 o
  -3  -5   5   699.66   673.01    38.37 o
  -2  -5   5   324.36   395.54    23.61 o
  -1  -5   5     0.18     2.95    14.76 <
   0  -5   5   456.02   534.27    20.66 o
   1  -5   5   473.96   460.48    23.61 o
   2  -5   5  1495.48  1275.17    35.42 o
  -4  -4   5    41.50    38.37    23.61 <
  -3  -4   5    45.31    50.18    23.61 <
  -2  -4   5   584.09   673.01    23.61 o
  -1  -4   5  2687.93  2517.88    38.37 o
   0  -4   5  2450.21  2482.46    35.42 o
   1  -4   5  4434.42  4601.84    53.13 o
   3  -4   5  2670.14  2240.41    41.33 o
  -4  -3   5   607.91   566.74    29.52 o
  -3  -3   5  1707.04  2116.43    50.18 o
   0  -3   5  7281.74  6420.14    50.18 o
   1  -3   5  6587.15  5826.83    56.08 o
   2  -3   5  4367.56  4159.07    50.18 o
   3  -3   5  2397.96  2382.09    41.33 o
   4  -3   5   804.23   861.92    32.47 o
  -4  -2   5  2068.05  1921.62    38.37 o
  -3  -2   5  4589.47  4914.73    44.28 o
  -2  -2   5  5505.16  5844.54    41.33 o
   0  -2   5  7112.18  7571.34    38.37 o
   1  -2   5  4677.50  4247.63    26.57 o
   2  -2   5  2089.12  2081.01    23.61 o
   3  -2   5   492.62   546.08    17.71 o
   4  -2   5    61.32    73.79    14.76 o
  -4  -1   5  2710.32  2733.36    47.23 o
  -3  -1   5  3541.58  3574.62    35.42 o
  -2  -1   5  3837.28  3760.58    38.37 o
  -1  -1   5  3948.13  3329.62    20.66 o
   0  -1   5  2797.14  2364.38    23.61 o
   1  -1   5   606.23   590.36    14.76 o
   2  -1   5     0.23    14.76     8.86 <
   3  -1   5   134.68   123.97    14.76 o
   4  -1   5   517.57   525.42    23.61 o
   5  -1   5   491.47   466.38    26.57 o
  -4   0   5  1374.80  1278.13    32.47 o
  -3   0   5  1170.57  1160.05    29.52 o
  -2   0   5   843.59   841.26    20.66 o
   0   0   5    78.68    88.55     5.90 o
   1   0   5  1406.39  1183.67    17.71 o
   2   0   5  1610.47  1647.10    23.61 o
   3   0   5  3054.26  2939.98    32.47 o
   4   0   5  1910.95  1841.92    23.61 o
   5   0   5  1899.56  1738.60    38.37 o
  -4   1   5   102.22    91.51    17.71 o
  -3   1   5     0.14    -2.95    11.81 <
  -2   1   5   138.48   165.30     8.86 o
  -1   1   5  1471.39  1248.61    11.81 o
   0   1   5  5920.47  5912.44    17.71 o
   1   1   5  4722.20  5074.13    23.61 o
   2   1   5  8261.31  9245.01    38.37 o
   3   1   5  4501.40  4510.34    29.52 o
   4   1   5  3750.44  3421.12    41.33 o
   5   1   5  1687.62  1582.16    35.42 o
  -4   2   5   241.02   253.85    20.66 o
  -3   2   5   966.91   820.60    23.61 o
  -2   2   5  2585.97  2414.56    17.71 o
  -1   2   5  8391.30  8403.75    26.57 o
   0   2   5  6904.48  6889.48    14.76 o
   1   2   5 11775.80 11352.60    26.57 o
   2   2   5  6610.38  6963.27    38.37 o
   3   2   5  4682.89  4808.47    26.57 o
   4   2   5  2017.37  2021.98    35.42 o
   5   2   5   506.58   457.53    20.66 o
  -4   3   5  1196.95   882.59    29.52 o
  -3   3   5  2179.17  2266.98    41.33 o
  -2   3   5  6216.25  6715.32    64.94 o
  -1   3   5  5481.31  5047.56    26.57 o
   0   3   5  8252.82  8672.36    26.57 o
   2   3   5  3186.40  3441.79    32.47 o
   3   3   5  1129.39  1174.81    23.61 o
   4   3   5   105.85   118.07    14.76 o
   5   3   5     9.95     5.90    17.71 <
  -3   4   5  2878.15  2470.65    35.42 o
  -2   4   5  2528.42  2181.37    26.57 o
  -1   4   5  2937.62  3105.28    26.57 o
   0   4   5  1802.19  1900.95    14.76 o
   1   4   5   789.53   799.93    14.76 o
   2   4   5    49.39    53.13    11.81 o
   3   4   5   125.68   115.12    14.76 o
   4   4   5   496.60   481.14    20.66 o
   5   4   5   418.83   460.48    26.57 o
  -3   5   5   670.84   605.12    29.52 o
  -2   5   5   470.74   501.80    23.61 o
  -1   5   5   104.56   126.93    14.76 o
   0   5   5     0.12     5.90     5.90 <
   1   5   5   456.84   366.02    17.71 o
   2   5   5  1117.30  1157.10    20.66 o
   3   5   5  1640.62  1555.59    29.52 o
   4   5   5  1365.24  1357.82    29.52 o
   5   5   5   952.10   720.24    38.37 o
  -3   6   5     3.31     5.90    11.81 <
  -2   6   5   106.51   100.36    17.71 o
  -1   6   5   290.52   354.21    20.66 o
   0   6   5  1322.83  1130.54    20.66 o
   1   6   5  2139.71  2231.55    32.47 o
   2   6   5  2342.81  2060.35    29.52 o
   3   6   5  2262.97  2326.01    35.42 o
   4   6   5  1260.04  1292.88    32.47 o
  -2   7   5   484.15   492.95    23.61 o
  -1   7   5  1297.59  1269.27    35.42 o
   0   7   5  2148.25  2092.82    35.42 o
   1   7   5  1901.74  1768.12    20.66 o
   2   7   5  2221.21  1959.99    38.37 o
   3   7   5  1066.42  1050.84    32.47 o
   4   7   5   801.88   782.22    29.52 o
   0   8   5   985.44  1357.82    29.52 o
   1   8   5  1314.63  1174.81    35.42 o
   2   8   5   560.02   504.76    26.57 o
   3   8   5   358.45   357.17    20.66 o
   0   9   5   429.92   569.70    47.23 o
   1   9   5   146.42   129.88    20.66 o
   2   9   5    41.49    32.47    17.71 <
  -2  -7   6   866.71  1095.11    50.18 o
  -1  -7   6  1401.37  1511.32    41.33 o
   0  -7   6  1487.40  1499.51    35.42 o
   1  -7   6  1949.34  1900.95    38.37 o
  -2  -6   6  2409.69  2886.85    53.13 o
  -1  -6   6  2541.30  2438.18    41.33 o
   0  -6   6  2971.64  3748.77    50.18 o
   1  -6   6  2119.86  2633.00    44.28 o
   2  -6   6  1013.33  1198.43    35.42 o
  -1  -5   6  2825.59  2922.27    47.23 o
   0  -5   6  1885.91  2154.81    38.37 o
   1  -5   6   738.29   926.86    23.61 o
   2  -5   6    89.86    94.46    20.66 o
   3  -5   6     1.67     8.86    17.71 <
  -4  -4   6  1527.62  1750.41    79.70 o
  -3  -4   6  1547.68  1909.81    50.18 o
  -1  -4   6   591.85   599.21    26.57 o
   0  -4   6    97.60   103.31    11.81 o
   1  -4   6   245.82   312.89    20.66 o
   2  -4   6   375.32   360.12    20.66 o
   3  -4   6   795.90   699.57    32.47 o
   4  -4   6   816.27   572.65    44.28 o
  -4  -3   6   359.54   360.12    29.52 o
  -3  -3   6   241.97   239.10    26.57 o
  -2  -3   6    23.16    23.61    14.76 <
  -1  -3   6   277.64   262.71    14.76 o
   0  -3   6  2446.15  2576.91    29.52 o
   1  -3   6  2476.90  2396.85    35.42 o
   2  -3   6  2936.69  2683.18    44.28 o
   3  -3   6  2781.06  2429.32    35.42 o
   4  -3   6  1777.41  1809.45    44.28 o
  -4  -2   6    22.08    23.61    14.76 <
  -3  -2   6   840.95   826.50    26.57 o
  -2  -2   6  1619.02  1714.99    38.37 o
  -1  -2   6  5629.23  4882.26    47.23 o
   0  -2   6  6086.87  5564.12    50.18 o
   1  -2   6  5793.78  5018.04    44.28 o
   2  -2   6  5639.60  5820.93    56.08 o
   3  -2   6  3227.78  3515.58    38.37 o
   4  -2   6  1575.39  1638.24    29.52 o
  -4  -1   6  1487.94  1393.24    35.42 o
  -3  -1   6  2472.35  2482.46    32.47 o
  -2  -1   6  6171.33  5897.68    50.18 o
   0  -1   6  6533.23  7881.28    50.18 o
   2  -1   6  3771.51  4108.89    35.42 o
   3  -1   6  1445.76  1434.57    23.61 o
   4  -1   6   505.90   478.19    17.71 o
   5  -1   6    22.75    35.42    29.52 <
  -4   0   6  1986.83  1903.90    32.47 o
  -3   0   6  4059.36  3976.06    47.23 o
  -2   0   6  5007.28  5124.31    47.23 o
  -1   0   6  4250.55  3663.17    20.66 o
   0   0   6  4120.48  4823.23    38.37 o
   1   0   6  2426.38  2113.48    20.66 o
   2   0   6   489.75   425.06    23.61 o
   3   0   6    48.33    56.08     8.86 o
   4   0   6   106.06   103.31    11.81 o
   5   0   6   136.76   129.88    26.57 o
  -4   1   6  1771.30  1614.63    38.37 o
  -3   1   6  1958.03  1965.89    35.42 o
  -2   1   6  1533.31  1632.34    29.52 o
  -1   1   6  1002.96   956.38     8.86 o
   0   1   6   468.34   495.90     8.86 o
   1   1   6    15.01    29.52     8.86 o
   2   1   6   461.37   478.19    14.76 o
   3   1   6  1072.00  1009.51    20.66 o
   4   1   6  1083.26   959.33    20.66 o
   5   1   6   976.22   885.54    29.52 o
  -4   2   6   397.77   383.73    23.61 o
  -3   2   6   201.87   212.53    17.71 o
  -2   2   6     7.32     8.86     5.90 <
  -1   2   6    89.93   103.31     5.90 o
   0   2   6   804.48   829.45     8.86 o
   1   2   6  2891.89  2851.43    17.71 o
   2   2   6  3243.68  2972.45    23.61 o
   3   2   6  3147.55  3217.45    29.52 o
   4   2   6  2455.00  2544.44    41.33 o
   5   2   6  1558.99  1505.41    26.57 o
  -3   3   6   199.58   150.54    14.76 o
  -2   3   6   904.71   752.71    17.71 o
  -1   3   6  1779.32  1732.70    23.61 o
   0   3   6  5287.03  5519.85    20.66 o
   1   3   6  5314.49  5053.46    23.61 o
   2   3   6  4973.11  4988.53    32.47 o
   3   3   6  3978.40  4209.25    44.28 o
   4   3   6  2147.26  2503.12    38.37 o
   5   3   6  1104.94  1033.13    32.47 o
  -3   4   6  1283.60  1275.17    35.42 o
  -2   4   6  1813.74  1653.00    23.61 o
  -1   4   6  4826.45  5009.19    29.52 o
   0   4   6  5094.06  5248.28    26.57 o
   1   4   6  4400.51  4380.46    23.61 o
   2   4   6  3858.88  3934.74    35.42 o
   3   4   6  1760.13  1821.25    32.47 o
   4   4   6   735.44   773.37    26.57 o
   5   4   6   163.99   147.59    20.66 o
  -3   5   6  1123.46   929.81    23.61 o
  -1   5   6  2888.18  2934.08    41.33 o
   0   5   6  2105.56  2346.67    23.61 o
   2   5   6   649.18   619.88    17.71 o
   3   5   6    92.20   103.31    14.76 o
   4   5   6     0.36    -5.90    17.71 <
  -2   6   6   941.32  1334.21    38.37 o
  -1   6   6   480.36   599.21    20.66 o
   0   6   6   242.32   197.77    17.71 o
   1   6   6    17.90    26.57     8.86 <
   2   6   6   148.82   159.40    14.76 o
   3   6   6   296.67   312.89    17.71 o
   4   6   6   858.80   850.12    29.52 o
  -2   7   6    19.29    35.42    23.61 <
  -1   7   6    30.97    32.47    14.76 <
   0   7   6   143.98   132.83    14.76 o
   2   7   6   920.12   959.33    17.71 o
   3   7   6  1412.68  1523.12    32.47 o
   4   7   6   897.48   979.99    41.33 o
  -1   8   6   360.22   454.58    29.52 o
   0   8   6   858.05   932.77    23.61 o
   1   8   6  1172.39  1393.24    32.47 o
   2   8   6  1329.49  1275.17    26.57 o
   0   9   6   861.17  1021.32    47.23 o
   2   9   6   567.22   634.64    29.52 o
  -2  -6   7   388.57   498.85    38.37 o
  -1  -6   7   872.59   977.04    26.57 o
   0  -6   7  1568.49  1679.57    35.42 o
   1  -6   7  1514.85  1564.45    35.42 o
  -3  -5   7  1099.92  1006.56    50.18 o
  -2  -5   7  1860.87  1977.70    47.23 o
  -1  -5   7  2927.53  2978.36    47.23 o
   0  -5   7  2962.15  3548.05    50.18 o
   1  -5   7  2507.52  2458.84    38.37 o
   2  -5   7  2308.78  2367.34    44.28 o
  -3  -4   7  2312.56  2308.30    50.18 o
  -2  -4   7  3257.29  3521.49    44.28 o
  -1  -4   7  3563.47  3751.73    53.13 o
   0  -4   7  2708.67  3406.37    47.23 o
   1  -4   7  2484.05  2565.11    38.37 o
   2  -4   7   699.05   684.82    26.57 o
   3  -4   7   174.87   123.97    17.71 o
  -3  -3   7  2264.32  2125.29    32.47 o
  -2  -3   7  2469.70  2237.46    41.33 o
  -1  -3   7  1678.72  1933.42    26.57 o
   0  -3   7  1245.20  1461.14    32.47 o
   1  -3   7   155.28   141.69    11.81 o
   2  -3   7    32.10    29.52    11.81 <
   3  -3   7   217.23   215.48    23.61 o
   4  -3   7   392.25   354.21    38.37 o
  -3  -2   7   788.76   749.76    20.66 o
  -2  -2   7   389.12   357.17    20.66 o
  -1  -2   7    46.80    53.13     8.86 o
   0  -2   7   177.44   221.38    14.76 o
   1  -2   7  1219.55  1304.69    26.57 o
   2  -2   7  1853.14  2075.11    35.42 o
   3  -2   7  1785.99  1886.19    41.33 o
   4  -2   7  1537.55  1614.63    26.57 o
  -4  -1   7    26.08    26.57    23.61 <
  -3  -1   7     7.51     8.86    14.76 <
  -2  -1   7   481.90   516.56    17.71 o
   0  -1   7  3978.26  4179.74    41.33 o
   1  -1   7  5452.50  5696.96    44.28 o
   2  -1   7  4264.55  3917.03    35.42 o
   3  -1   7  3344.96  3246.97    35.42 o
   4  -1   7  2275.90  2075.11    38.37 o
  -4   0   7   302.21   277.47    20.66 o
  -3   0   7  1416.84  1405.05    23.61 o
  -2   0   7  3141.06  3102.33    38.37 o
  -1   0   7  5581.71  4663.83    26.57 o
   0   0   7  7947.79  8037.72    32.47 o
   1   0   7  5990.52  5729.42    35.42 o
   2   0   7  4234.58  4017.39    32.47 o
   3   0   7  3100.41  2659.56    29.52 o
   4   0   7   847.69   761.56    20.66 o
  -4   1   7  1437.80  1281.08    47.23 o
  -3   1   7  2820.65  2712.70    32.47 o
  -2   1   7  4394.14  4409.97    35.42 o
  -1   1   7  6061.79  5283.70    23.61 o
   0   1   7  4839.45  5596.59    35.42 o
   1   1   7  2713.24  2662.51    17.71 o
   2   1   7  2442.82  2373.24    32.47 o
   3   1   7   283.72   265.66    11.81 o
   4   1   7    88.22    97.41    11.81 o
  -3   2   7  2205.09  2290.59    41.33 o
  -2   2   7  2545.20  2833.72    29.52 o
  -1   2   7  2137.08  2402.76    26.57 o
   0   2   7   613.17   652.35    11.81 o
   1   2   7   754.33   758.61     8.86 o
   2   2   7    24.61    11.81     8.86 <
   3   2   7   112.65   109.22    11.81 o
   4   2   7   517.96   481.14    17.71 o
   5   2   7   467.54   410.30    20.66 o
  -3   3   7   544.15   608.07    26.57 o
  -2   3   7   411.95   460.48    14.76 o
  -1   3   7     5.34    11.81     8.86 <
   0   3   7     2.42    -2.95    11.81 <
   1   3   7   688.60   605.12     8.86 o
   2   3   7  1143.87  1101.02    20.66 o
   3   3   7  1731.10  1951.13    23.61 o
   4   3   7  1393.51  1558.55    29.52 o
   5   3   7  1011.57  1021.32    41.33 o
  -3   4   7     0.93     5.90    17.71 <
  -2   4   7   263.61   227.29    14.76 o
  -1   4   7   477.61   519.52    17.71 o
   0   4   7  1532.90  1588.06    20.66 o
   1   4   7  2442.04  2098.72    17.71 o
   2   4   7  3134.93  3344.38    32.47 o
   3   4   7  2316.24  2452.94    38.37 o
   4   4   7  1705.01  1797.64    38.37 o
  -3   5   7   425.76   339.46    23.61 o
  -2   5   7   888.40   856.02    29.52 o
  -1   5   7  1704.78  1918.66    32.47 o
   0   5   7  2574.64  2405.71    29.52 o
   1   5   7  3502.93  2948.84    29.52 o
   2   5   7  2356.21  2355.53    26.57 o
   3   5   7  1781.12  1809.45    32.47 o
   4   5   7   974.12  1039.03    29.52 o
  -2   6   7  1209.51   965.23    29.52 o
  -1   6   7  1612.87  1346.02    23.61 o
   0   6   7  2421.60  1927.52    38.37 o
   1   6   7  1451.16  1151.20    23.61 o
   2   6   7   985.89  1024.27    23.61 o
   3   6   7   555.72   593.31    20.66 o
   4   6   7    73.93    70.84    17.71 o
   0   7   7   494.00   351.26    17.71 o
   1   7   7   167.92   144.64    14.76 o
   2   7   7   102.22    76.75    14.76 o
   3   7   7    41.56    44.28    17.71 <
   0   8   7    15.84     8.86    11.81 <
   1   8   7    14.70    11.81    14.76 <
   2   8   7   349.83   321.74    26.57 o
   3   8   7   338.23   475.24    26.57 o
   0  -6   8     1.08   -11.81    17.71 <
   1  -6   8   128.35   185.96    29.52 o
  -2  -5   8    32.40    61.99    20.66 <
  -1  -5   8   340.88   386.68    17.71 o
   0  -5   8   919.96  1174.81    32.47 o
   1  -5   8  1290.91  1351.92    32.47 o
   2  -5   8  1377.53  1706.13    61.99 o
  -2  -4   8  1233.25  1322.40    29.52 o
  -1  -4   8  2293.81  2331.91    29.52 o
   0  -4   8  2667.85  3152.51    47.23 o
   1  -4   8  3053.90  3751.73    56.08 o
   2  -4   8  1908.44  2013.12    32.47 o
  -3  -3   8  1729.92  1540.83    38.37 o
  -2  -3   8  3170.32  2904.56    44.28 o
  -1  -3   8  3211.58  3211.55    47.23 o
   0  -3   8  4140.61  4737.62    50.18 o
   1  -3   8  2266.47  2287.64    35.42 o
   2  -3   8  2032.99  2328.96    35.42 o
   3  -3   8   739.26   507.71    29.52 o
  -3  -2   8  2745.32  2447.03    32.47 o
  -2  -2   8  2411.58  2337.82    35.42 o
  -1  -2   8  3338.14  3146.61    32.47 o
   0  -2   8  1601.29  1803.54    26.57 o
   1  -2   8  1233.84  1499.51    32.47 o
   2  -2   8   324.04   368.97    23.61 o
   3  -2   8     3.56    11.81    17.71 <
   4  -2   8    74.29    47.23    29.52 <
  -3  -1   8  1115.68  1086.26    32.47 o
  -2  -1   8  1408.67  1387.34    26.57 o
  -1  -1   8   470.48   436.86    14.76 o
   0  -1   8   148.99   180.06    14.76 o
   1  -1   8    11.29    17.71    14.76 <
   2  -1   8   609.83   625.78    23.61 o
   3  -1   8   935.18   944.57    26.57 o
   4  -1   8   891.11   953.43    32.47 o
  -3   0   8   176.99   177.11    14.76 o
  -2   0   8     0.57    11.81     8.86 <
  -1   0   8   208.52   180.06    14.76 o
   0   0   8   938.20  1192.52    23.61 o
   1   0   8  2530.30  2756.97    29.52 o
   2   0   8  3217.13  3252.87    35.42 o
   3   0   8  2538.89  2514.93    26.57 o
   4   0   8  1880.19  1723.85    26.57 o
  -3   1   8   329.83   377.83    26.57 o
  -2   1   8  1054.34  1092.16    23.61 o
  -1   1   8  2593.62  2523.78    38.37 o
   0   1   8  4459.02  4743.53    26.57 o
   1   1   8  5511.63  6251.89    38.37 o
   2   1   8  4362.75  3872.75    41.33 o
   3   1   8  2645.21  2328.96    23.61 o
  -3   2   8  1348.22  1461.14    35.42 o
  -2   2   8  2913.39  2866.19    38.37 o
  -1   2   8  4351.09  4395.22    29.52 o
   0   2   8  5012.64  6142.68    50.18 o
   1   2   8  4470.89  4522.14    23.61 o
   2   2   8  2012.14  1794.69    32.47 o
   3   2   8  1412.42  1254.51    23.61 o
   4   2   8   359.06   357.17    14.76 o
  -3   3   8  1785.12  2075.11    44.28 o
  -2   3   8  2617.66  3223.35    41.33 o
  -1   3   8  2423.86  2328.96    29.52 o
   0   3   8  2531.24  2839.62    35.42 o
   1   3   8   599.67   537.23    17.71 o
   2   3   8   447.01   448.67    17.71 o
   3   3   8    17.37    23.61     8.86 <
   4   3   8    68.50    61.99    14.76 o
  -3   4   8  1012.18  1582.16    64.94 o
  -2   4   8   566.72   681.86    23.61 o
  -1   4   8   674.40   670.06    17.71 o
   0   4   8     6.84    23.61    14.76 <
   1   4   8     3.38     0.00     8.86 <
   2   4   8   185.78   171.20    11.81 o
   3   4   8   664.88   681.86    17.71 o
   4   4   8   697.53   811.74    20.66 o
  -2   5   8    29.06    44.28    17.71 <
  -1   5   8   196.97   206.62    11.81 o
   0   5   8   390.73   330.60    14.76 o
   1   5   8   734.12   649.39    11.81 o
   2   5   8  1437.72  1254.51    23.61 o
   3   5   8  1414.13  1505.41    29.52 o
  -2   6   8   380.82   507.71    29.52 o
  -1   6   8   706.02   873.73    29.52 o
   0   6   8  1045.85  1071.50    29.52 o
   2   6   8  1732.18  1496.56    26.57 o
   3   6   8  1153.32  1269.27    29.52 o
   4   6   8   834.73   867.83    29.52 o
  -1   7   8   889.05  1127.58    53.13 o
   0   7   8  1055.98   838.31    23.61 o
   2   7   8   846.72   746.80    20.66 o
   3   7   8   529.59   596.26    23.61 o
   2   8   8   133.28   112.17    14.76 o
   3   8   8    47.29    56.08    20.66 <
  -1  -5   9   698.32   711.38    29.52 o
   0  -5   9   193.66   194.82    20.66 o
   1  -5   9    18.30    35.42    26.57 <
  -2  -4   9    86.94    73.79    17.71 o
  -1  -4   9     8.69    23.61    14.76 <
   0  -4   9   241.93   242.05    17.71 o
   1  -4   9   620.51   791.08    29.52 o
   2  -4   9  1110.47  1540.83    41.33 o
  -2  -3   9   419.23   436.86    17.71 o
  -1  -3   9  1203.11  1195.48    26.57 o
   0  -3   9  2043.11  1965.89    35.42 o
   1  -3   9  2539.01  3308.96    50.18 o
   2  -3   9  2184.75  2151.86    41.33 o
   3  -3   9  1493.67  1168.91    38.37 o
  -3  -2   9   981.85   808.79    26.57 o
  -2  -2   9  1918.93  1918.66    29.52 o
  -1  -2   9  3307.06  3010.83    23.61 o
   0  -2   9  3383.53  3173.17    38.37 o
   1  -2   9  3212.39  3890.46    50.18 o
   2  -2   9  2028.55  2482.46    44.28 o
   3  -2   9  1238.39  1145.29    32.47 o
  -3  -1   9  1641.80  1484.75    32.47 o
  -2  -1   9  3146.53  2789.44    41.33 o
  -1  -1   9  2800.14  2467.70    23.61 o
   1  -1   9  1709.83  1830.11    32.47 o
   2  -1   9   777.77   920.96    29.52 o
   3  -1   9   325.85   306.99    20.66 o
   4  -1   9     7.57    29.52    32.47 <
  -3   0   9  1881.86  1700.23    50.18 o
  -2   0   9  1454.01  1632.34    41.33 o
  -1   0   9  1264.12  1201.38    14.76 o
   0   0   9   716.32   805.84    23.61 o
   1   0   9   107.95   123.97    14.76 o
   2   0   9     5.00     8.86    11.81 <
   3   0   9   155.01   144.64    11.81 o
   4   0   9   521.66   469.33    20.66 o
  -3   1   9   422.05   428.01    29.52 o
  -2   1   9   200.29   203.67    23.61 o
  -1   1   9    35.03    20.66     8.86 <
   0   1   9   116.99   115.12    14.76 o
   1   1   9   443.65   487.05    20.66 o
   2   1   9   989.85  1041.98    23.61 o
   3   1   9  1902.94  1809.45    26.57 o
   4   1   9  1060.67  1030.17    20.66 o
  -3   2   9     9.06    17.71    20.66 <
  -2   2   9   172.61   224.34    26.57 o
  -1   2   9   733.55   729.09    17.71 o
   0   2   9  1699.66  1818.30    29.52 o
   1   2   9  2262.97  2414.56    38.37 o
   2   2   9  3617.94  3725.16    29.52 o
   3   2   9  2092.06  1942.28    23.61 o
   4   2   9  1585.78  1617.58    29.52 o
  -2   3   9  1106.96  1121.68    32.47 o
  -1   3   9  2362.76  2482.46    29.52 o
   1   3   9  3928.71  3323.72    38.37 o
   2   3   9  2513.41  2677.27    41.33 o
   3   3   9  1563.74  1537.88    29.52 o
   4   3   9   678.22   702.53    17.71 o
  -2   4   9  1727.83  2030.83    47.23 o
  -1   4   9  2145.50  2030.83    26.57 o
   0   4   9  2411.12  2836.67    41.33 o
   2   4   9   796.00   696.62    20.66 o
   3   4   9   216.43   227.29    14.76 o
   4   4   9    57.62    79.70    14.76 o
  -2   5   9   991.08  1165.96    38.37 o
  -1   5   9   783.58   979.99    29.52 o
   0   5   9   497.52   501.80    23.61 o
   1   5   9   115.93    67.89    11.81 o
   2   5   9    11.04    -5.90    11.81 <
   3   5   9    34.44    44.28    11.81 o
   4   5   9   235.76   203.67    26.57 o
  -1   6   9    15.32    26.57    17.71 <
   0   6   9    19.40    17.71    17.71 <
   2   6   9   330.26   280.42    14.76 o
   3   6   9   608.22   752.71    29.52 o
   0   7   9   599.47   472.29    23.61 o
   1   7   9   609.42   425.06    23.61 o
  -1  -4  10  1124.13  1558.55    44.28 o
   0  -4  10   773.12   740.90    26.57 o
   1  -4  10   369.70   345.36    20.66 o
  -2  -3  10   430.16   295.18    23.61 o
  -1  -3  10   130.55   100.36    14.76 o
   0  -3  10    23.13    17.71    11.81 <
   1  -3  10   187.25   203.67    17.71 o
   2  -3  10   276.64   298.13    17.71 o
  -2  -2  10    77.80    61.99    14.76 o
  -1  -2  10   198.17   221.38    20.66 o
   0  -2  10  1153.48  1198.43    26.57 o
   1  -2  10  1330.60  1390.29    29.52 o
   3  -2  10  1500.18  1304.69    32.47 o
  -2  -1  10   835.00  1000.66    44.28 o
  -1  -1  10  2143.32  2196.13    38.37 o
   0  -1  10  2614.55  2630.05    35.42 o
   1  -1  10  2987.67  3615.94    47.23 o
   2  -1  10  2383.98  2733.36    44.28 o
   3  -1  10  1342.85  1573.30    35.42 o
  -2   0  10  2078.22  2373.24    56.08 o
  -1   0  10  2766.28  3208.60    41.33 o
   0   0  10  2886.88  2591.67    32.47 o
   1   0  10  2184.25  2116.43    32.47 o
   2   0  10  1239.55  1275.17    29.52 o
   3   0  10   556.44   652.35    23.61 o
  -2   1  10  1710.93  1995.41    79.70 o
  -1   1  10  1742.74  1895.05    26.57 o
   0   1  10  1055.64  1160.05    23.61 o
   1   1  10   564.34   649.39    23.61 o
   2   1  10   132.62   168.25    11.81 o
   3   1  10     2.29     2.95     8.86 <
   4   1  10    27.71    32.47    17.71 <
  -2   2  10   618.66   752.71    38.37 o
  -1   2  10   189.21   250.90    20.66 o
   0   2  10    35.20    44.28    17.71 <
   1   2  10    16.61    11.81    11.81 <
   2   2  10   283.08   265.66    14.76 o
   3   2  10   324.22   363.07    14.76 o
   4   2  10   813.21   779.27    29.52 o
  -2   3  10     2.00     5.90    23.61 <
  -1   3  10   126.96   200.72    17.71 o
   0   3  10   297.93   501.80    35.42 o
   1   3  10  1140.69  1174.81    29.52 o
   2   3  10   917.61  1036.08    26.57 o
   3   3  10  1699.32  1670.71    32.47 o
   4   3  10  1068.49  1260.41    44.28 o
  -1   4  10   589.68   823.55    44.28 o
   0   4  10  1752.27  2246.31    53.13 o
   1   4  10  1402.59  1189.57    35.42 o
   2   4  10  2135.69  1936.37    32.47 o
   3   4  10  1440.15  1481.80    32.47 o
   0   5  10  1296.22  1514.27    44.28 o
   2   5  10  1144.79   918.01    32.47 o
   3   5  10   494.70   581.50    26.57 o
   0   6  10   746.61   684.82    26.57 o
   2   6  10   134.20    56.08    23.61 <
   3   6  10     2.34     5.90    20.66 <
   0  -3  11  1273.85  1180.72    38.37 o
   1  -3  11   724.37   578.55    29.52 o
  -1  -2  11   701.09   572.65    29.52 o
   0  -2  11   175.37   138.73    14.76 o
   1  -2  11    64.46    56.08    11.81 o
   2  -2  11    40.82    53.13    14.76 o
  -1  -1  11    35.79    85.60    20.66 o
   0  -1  11    85.67   109.22    14.76 o
   1  -1  11   590.20   749.76    26.57 o
   2  -1  11   914.02   915.05    26.57 o
  -1   0  11   659.32   743.85    29.52 o
   0   0  11  1487.36  1626.44    26.57 o
   1   0  11  2094.47  2331.91    41.33 o
   2   0  11  1850.05  1520.17    26.57 o
   3   0  11  1594.77  1564.45    32.47 o
  -1   1  11  1819.03  1945.23    38.37 o
   0   1  11  2510.80  2311.25    35.42 o
   1   1  11  2130.25  2396.85    41.33 o
   2   1  11  1636.18  1889.15    38.37 o
   3   1  11   883.39   870.78    26.57 o
  -1   2  11  1682.33  1945.23    41.33 o
   0   2  11  1491.15  1962.94    41.33 o
   1   2  11   903.57  1115.78    29.52 o
   2   2  11   456.45   498.85    26.57 o
   3   2  11    65.74    56.08    11.81 o
   0   3  11   204.80   348.31    32.47 o
   1   3  11    40.63    53.13    14.76 o
   2   3  11    13.98    14.76    11.81 <
   3   3  11    79.37    73.79    23.61 o
  -1   4  11     0.83    -2.95     2.95 <
   0   4  11    77.79    85.60    23.61 o
   1   4  11   194.65   224.34    23.61 o
   2   4  11   455.23   383.73    17.71 o
   1   5  11   789.16   602.16    26.57 o
   2   5  11   862.19   732.04    32.47 o
   0   0  12     1.92     5.90    11.81 <
   1   0  12    51.61    73.79    17.71 o
   0   1  12   523.34   613.97    26.57 o
   1   1  12   747.99   885.54    26.57 o
   0   2  12  1195.09  1487.70    35.42 o
   1   2  12  1686.80  1779.93    35.42 o
   0   3  12  1303.42  1505.41    47.23 o
   1   3  12  1321.16  1405.05    44.28 o
   2   3  12   539.53   469.33    26.57 o
   0   4  12   641.66   652.35    32.47 o
