# Supplementary material
Source: MDPI journal article supplement (https://www.mdpi.com/2304-6740/6/4/135)
Supplement: s1 [file s1 › Tl(dca).cif]

data_11913sadabs

loop_
_publ_author_name
_publ_author_address

'Markus Mann'
;     Institute of Inorganic Chemistry 
      RWTH Aachen University 
      Landoltweg 1 
      52056 Aachen
      Germany
;
'Olaf Reckeweg'
;     Institute of Inorganic Chemistry 
      RWTH Aachen University 
      Landoltweg 1 
      52056 Aachen
      Germany
;
'Nils N\"othling'
;     Max-Planck-Institut f\"ur Kohlenforschung
      Kaiser-Wilhelm-Platz 1
      45470 M\"ulheim an der Ruhr
      Germany
;
'Richard Goddard'
;     Max-Planck-Institut f\"ur Kohlenforschung
      Kaiser-Wilhelm-Platz 1
      45470 M\"ulheim an der Ruhr
      Germany
;
'Richard Dronskowski'
;     Institute of Inorganic Chemistry 
      RWTH Aachen University 
      Landoltweg 1 
      52056 Aachen
      Germany
;

_audit_creation_date             2018-10-09
_audit_creation_method           
;
Olex2 1.2
(compiled 2018.05.29 svn.r3508 for OlexSys, GUI svn.r5506)
;
_shelx_SHELXL_version_number     2014/7

_audit_block_code                NON-NA-095
_publ_requested_journal          '11913'
_publ_section_references         
;
Dolomanov, O.V., Bourhis, L.J., Gildea, R.J, Howard, J.A.K. & Puschmann, H.
 (2009), J. Appl. Cryst. 42, 339-341.

Sheldrick, G.M. (2015). Acta Cryst. A71, 3-8.

Sheldrick, G.M. (2015). Acta Cryst. C71, 3-8.
;

_publ_section_title              
;
? Markus_Mann_RWTH-Aachen_13_Sept_2018
;
_chemical_name_common            'thallium dicyanamide'
_chemical_name_systematic        
;
 thallium dicyanamide
;
_chemical_formula_moiety         'C2 N3 Tl'
_chemical_formula_sum            'C2 N3 Tl'
_chemical_formula_weight         270.42
_chemical_properties_physical    none
loop_
_atom_type_symbol
_atom_type_description
_atom_type_scat_dispersion_real
_atom_type_scat_dispersion_imag
_atom_type_scat_source
C C 0.0033 0.0016 'International Tables Vol C Tables 4.2.6.8 and 6.1.1.4'
N N 0.0061 0.0033 'International Tables Vol C Tables 4.2.6.8 and 6.1.1.4'
Tl Tl -2.8358 9.6688 'International Tables Vol C Tables 4.2.6.8 and 6.1.1.4'

_shelx_space_group_comment       
;
The symmetry employed for this shelxl refinement is uniquely defined
by the following loop, which should always be used as a source of
symmetry information in preference to the above space-group names.
They are only intended as comments.
;
_space_group_crystal_system      orthorhombic
_space_group_IT_number           57
_space_group_name_H-M_alt        'P b c m'
_space_group_name_Hall           '-P 2c 2b'

loop_
_space_group_symop_operation_xyz
'x, y, z'
'-x, -y, z+1/2'
'-x, y+1/2, -z+1/2'
'x, -y+1/2, -z'
'-x, -y, -z'
'x, y, -z-1/2'
'x, -y-1/2, z-1/2'
'-x, y-1/2, z'

_cell_length_a                   8.5770(17)
_cell_length_b                   6.4756(13)
_cell_length_c                   7.2306(14)
_cell_angle_alpha                90
_cell_angle_beta                 90
_cell_angle_gamma                90
_cell_volume                     401.60(14)
_cell_formula_units_Z            4
_cell_measurement_reflns_used    10004

_cell_measurement_temperature    100(2)
_cell_measurement_theta_max      33.1009
_cell_measurement_theta_min      2.8239
_exptl_absorpt_coefficient_mu    40.022
_exptl_absorpt_correction_T_max  0.46282
_exptl_absorpt_correction_T_min  0.15236

loop_
_exptl_crystal_face_index_h
_exptl_crystal_face_index_k
_exptl_crystal_face_index_l
_exptl_crystal_face_perp_dist
   0.000   0.000   1.000   0.01000
   0.000   0.000  -1.000   0.01000
  -1.000  -2.000   0.000   0.02500
   1.000   2.000   0.000   0.02500
   1.000  -2.000   0.000   0.02000
  -1.000   2.000   0.000   0.02000

_exptl_absorpt_correction_type   gaussian
_exptl_absorpt_process_details   'SADABS (Bruker AXS, 2012)'
_exptl_absorpt_special_details   ?
_exptl_crystal_colour            colourless
_exptl_crystal_density_diffrn    4.473
_exptl_crystal_density_meas      ?
_exptl_crystal_density_method    'not measured'
_exptl_crystal_recrystallization_method 
'Re-crystallisation from solvent:  water'

_exptl_crystal_description       plate
_exptl_crystal_F_000             456
_exptl_crystal_size_max          0.05
_exptl_crystal_size_mid          0.04
_exptl_crystal_size_min          0.02
_exptl_special_details           
;
 Crystal mounted on a MiTeGen loop using Perfluoropolyether PFO-XR75
;
_exptl_transmission_factor_max   ?
_exptl_transmission_factor_min   ?
_diffrn_reflns_av_R_equivalents  0.0307
_diffrn_reflns_av_unetI/netI     0.0153
_diffrn_reflns_Laue_measured_fraction_full 0.997
_diffrn_reflns_Laue_measured_fraction_max 0.998
_diffrn_reflns_limit_h_max       13
_diffrn_reflns_limit_h_min       -13
_diffrn_reflns_limit_k_max       9
_diffrn_reflns_limit_k_min       -9
_diffrn_reflns_limit_l_max       11
_diffrn_reflns_limit_l_min       -11
_diffrn_reflns_number            8880
_diffrn_reflns_point_group_measured_fraction_full 0.997
_diffrn_reflns_point_group_measured_fraction_max 0.998
_diffrn_reflns_theta_full        25.242
_diffrn_reflns_theta_max         33.088
_diffrn_reflns_theta_min         3.943

_diffrn_ambient_temperature      100(2)
_diffrn_detector_area_resol_mean 18.02
_diffrn_measured_fraction_theta_full 0.997
_diffrn_measured_fraction_theta_max 0.998
_diffrn_measurement_device_type  'Bruker AXS Enraf-Nonius KappaCCD'
_diffrn_measurement_method       'CCD \f- and \w-scans'
_diffrn_radiation_type           MoK\a
_diffrn_radiation_wavelength     0.71073
_diffrn_radiation_source         '0.2 x 2mm^2^ focus rotating anode'
_diffrn_radiation_monochromator  'Incoatec Helios focusing multilayer optics'
_diffrn_standards_number         0
_reflns_Friedel_coverage         0.000
_reflns_Friedel_fraction_full    .
_reflns_Friedel_fraction_max     .
_reflns_number_gt                549
_reflns_number_total             816
_reflns_special_details          
;
 Reflections were merged by SHELXL according to the crystal
 class for the calculation of statistics and refinement.
 
 _reflns_Friedel_fraction is defined as the number of unique
 Friedel pairs measured divided by the number that would be
 possible theoretically, ignoring centric projections and
 systematic absences.
;
_reflns_threshold_expression     'I > 2\s(I)'
_computing_cell_refinement       'REVALCCD V. 1.6, 2008'

_computing_data_collection       'DATCOL (Bruker AXS, 2006)'
_computing_data_reduction        'REVALCCD V. 1.6, 2008'
_computing_molecular_graphics    'DIAMOND (Crystal Impact GbR, 1997-2013)'
_computing_publication_material  'Olex2 (Dolomanov et al., 2009)'
_computing_structure_refinement  'SHELXL (Sheldrick, 2015)'
_computing_structure_solution    'SHELXT (Sheldrick, 2015)'
_refine_diff_density_max         0.768
_refine_diff_density_min         -1.883
_refine_diff_density_rms         0.260
_refine_ls_extinction_coef       .
_refine_ls_extinction_method     none
_refine_ls_goodness_of_fit_ref   1.088
_refine_ls_hydrogen_treatment    none
_refine_ls_matrix_type           full
_refine_ls_number_parameters     36
_refine_ls_number_reflns         816
_refine_ls_number_restraints     0
_refine_ls_R_factor_all          0.0325
_refine_ls_R_factor_gt           0.0187
_refine_ls_restrained_S_all      1.088
_refine_ls_shift/su_max          0.001
_refine_ls_shift/su_mean         0.000
_refine_ls_structure_factor_coef Fsqd
_refine_ls_weighting_details     
'w=1/[\s^2^(Fo^2^)+(0.0220P)^2^+0.6298P] where P=(Fo^2^+2Fc^2^)/3'
_refine_ls_weighting_scheme      calc
_refine_ls_wR_factor_gt          0.0394
_refine_ls_wR_factor_ref         0.0445

_refine_special_details          
;
 Refinement of F^2^ against ALL reflections.  The weighted R-factor wR and
 goodness of fit S are based on F^2^, conventional R-factors R are based
 on F, with F set to zero for negative F^2^. The threshold expression of
 F^2^ > 2sigma(F^2^) is used only for calculating R-factors(gt) etc. and is
 not relevant to the choice of reflections for refinement.  R-factors based
 on F^2^ are statistically about twice as large as those based on F, and R-
 factors based on ALL data will be even larger.

 The minimum and maximum estimated transmissions from the multi-scan
 scaling are 0.1446 and 0.4545 (SADABS).

INTENSITY STATISTICS FOR DATASET 

 Resolution   #Data #Theory %Complete Redundancy Mean I Mean I/s Rmerge  Rsigma

  Inf - 3.15      14     15     93.3    13.47    225.65   68.28  0.0208  0.0083
 3.15 - 1.99      32     32    100.0    13.66    239.53   83.11  0.0221  0.0070
 1.99 - 1.51      46     46    100.0    13.07    187.24   69.55  0.0211  0.0087
 1.51 - 1.29      47     47    100.0    13.53    129.71   58.71  0.0246  0.0083
 1.29 - 1.17      45     45    100.0    12.53     87.43   41.24  0.0252  0.0112
 1.17 - 1.06      48     48    100.0    12.50    109.97   52.48  0.0235  0.0116
 1.06 - 1.00      49     49    100.0    12.27     84.57   42.88  0.0245  0.0113
 1.00 - 0.95      40     40    100.0    11.60     43.21   27.81  0.0347  0.0161
 0.95 - 0.90      49     49    100.0    11.20     74.06   37.95  0.0274  0.0145
 0.90 - 0.86      52     52    100.0    10.17     67.48   34.88  0.0286  0.0160
 0.86 - 0.83      45     45    100.0    11.22     36.91   24.70  0.0383  0.0210
 0.83 - 0.80      50     50    100.0     9.68     47.56   27.13  0.0392  0.0214
 0.80 - 0.78      34     34    100.0     9.56     36.72   22.44  0.0473  0.0251
 0.78 - 0.76      45     45    100.0     9.20     49.01   25.73  0.0411  0.0225
 0.76 - 0.74      49     49    100.0     9.69     22.57   16.21  0.0607  0.0334
 0.74 - 0.72      43     43    100.0     8.63     32.99   18.09  0.0544  0.0311
 0.72 - 0.70      68     68    100.0     8.00     33.41   18.74  0.0545  0.0326
 0.70 - 0.69      26     26    100.0     8.77     37.42   22.27  0.0484  0.0311
 0.69 - 0.67      69     69    100.0     7.97     19.61   11.56  0.0776  0.0484
 0.67 - 0.66      32     32    100.0     7.53     23.09   15.38  0.0774  0.0487
 0.66 - 0.65      39     40     97.5     7.10     19.36   12.54  0.0872  0.0569
------------------------------------------------------------------------------
 0.75 - 0.65     300    301     99.7     8.08     27.14   16.19  0.0618  0.0383
  Inf - 0.65     922    924     99.8    10.39     69.27   33.00  0.0296  0.0155
-------------------------------------------------------------------------------

 Highest peak    0.77  at  0.3569  0.0828  0.5041  [  1.14 A from TL1 ]
 Deepest hole   -1.88  at  0.3966  0.2500  0.5000  [  0.69 A from TL1 ]
;
_olex2_refinement_description    
;
;
_atom_sites_solution_hydrogens   none

_atom_sites_solution_primary     direct
_atom_sites_solution_secondary   difmap
loop_
_atom_site_label
_atom_site_type_symbol
_atom_site_fract_x
_atom_site_fract_y
_atom_site_fract_z
_atom_site_U_iso_or_equiv
_atom_site_adp_type
_atom_site_occupancy
_atom_site_site_symmetry_order
_atom_site_calc_flag
_atom_site_refinement_flags_posn
_atom_site_refinement_flags_adp
_atom_site_refinement_flags_occupancy
_atom_site_disorder_assembly
_atom_site_disorder_group
C1 C 0.6880(5) 0.2630(11) 0.7500 0.0144(10) Uani 1 2 d S T P . .
C2 C 0.9369(7) 0.1356(9) 0.7500 0.0150(10) Uani 1 2 d S T P . .
N2 N 0.7848(7) 0.1054(9) 0.7500 0.0218(12) Uani 1 2 d S T P . .
N1 N 0.5898(6) 0.3835(8) 0.7500 0.0183(10) Uani 1 2 d S T P . .
N3 N 1.0707(6) 0.1391(8) 0.7500 0.0194(10) Uani 1 2 d S T P . .
Tl1 Tl 0.31674(2) 0.2500 0.5000 0.01287(6) Uani 1 2 d S T P . .

loop_
_atom_site_aniso_label
_atom_site_aniso_U_11
_atom_site_aniso_U_22
_atom_site_aniso_U_33
_atom_site_aniso_U_23
_atom_site_aniso_U_13
_atom_site_aniso_U_12
C1 0.012(2) 0.009(3) 0.022(3) 0.000 0.000 -0.003(3)
C2 0.017(3) 0.008(2) 0.020(3) 0.000 0.000 -0.002(2)
N2 0.012(2) 0.010(2) 0.043(4) 0.000 0.000 -0.003(2)
N1 0.0111(19) 0.013(2) 0.031(3) 0.000 0.000 -0.002(2)
N3 0.015(2) 0.012(2) 0.031(3) 0.000 0.000 0.0007(19)
Tl1 0.01236(9) 0.01241(10) 0.01384(9) -0.00016(13) 0.000 0.000

_geom_special_details            
;
 All esds (except the esd in the dihedral angle between two l.s. planes)
 are estimated using the full covariance matrix.  The cell esds are taken
 into account individually in the estimation of esds in distances, angles
 and torsion angles; correlations between esds in cell parameters are only
 used when they are defined by crystal symmetry.  An approximate (isotropic)
 treatment of cell esds is used for estimating esds involving l.s. planes.
;
loop_
_geom_bond_atom_site_label_1
_geom_bond_atom_site_label_2
_geom_bond_distance
_geom_bond_site_symmetry_2
_geom_bond_publ_flag
C1 N2 1.316(8) . ?
C1 N1 1.148(8) . ?
C2 N2 1.319(7) . ?
C2 N3 1.148(7) . ?
Tl1 Tl1 3.6153(7) 6_556 ?
Tl1 Tl1 3.6153(7) 6_557 ?

loop_
_geom_angle_atom_site_label_1
_geom_angle_atom_site_label_2
_geom_angle_atom_site_label_3
_geom_angle
_geom_angle_site_symmetry_1
_geom_angle_site_symmetry_3
_geom_angle_publ_flag
N1 C1 N2 172.0(6) . . ?
N3 C2 N2 172.6(6) . . ?
C1 N2 C2 120.6(5) . . ?
Tl1 Tl1 Tl1 180.0 6_557 6_556 ?

_shelx_res_file                  
;
    11913sadabs.res created by SHELXL-2014/7

TITL 11913sadabs_dick_t in Pbcm
CELL 0.71073 8.577 6.4756 7.2306 90 90 90
ZERR 4 0.0017 0.0013 0.0014 0 0 0
LATT 1
SYMM -X,-Y,0.5+Z
SYMM -X,0.5+Y,0.5-Z
SYMM +X,0.5-Y,-Z
SFAC C N Tl
UNIT 8 12 4

L.S. 30
PLAN  20
LIST 4
fmap 2
acta
REM <olex2.extras>
REM <HklSrc "%.\\11913sadabs.hkl">
REM </olex2.extras>

WGHT    0.022000    0.629800
FVAR       0.11531
C1    1    0.687969    0.263047    0.750000    10.50000    0.01179    0.00932 =
         0.02198    0.00000    0.00000   -0.00279
C2    1    0.936907    0.135563    0.750000    10.50000    0.01705    0.00835 =
         0.01973    0.00000    0.00000   -0.00209
N2    2    0.784848    0.105427    0.750000    10.50000    0.01197    0.01029 =
         0.04313    0.00000    0.00000   -0.00304
N1    2    0.589830    0.383544    0.750000    10.50000    0.01105    0.01279 =
         0.03102    0.00000    0.00000   -0.00195
N3    2    1.070735    0.139111    0.750000    10.50000    0.01505    0.01227 =
         0.03094    0.00000    0.00000    0.00072
TL1   3    0.316740    0.250000    0.500000    10.50000    0.01236    0.01241 =
         0.01384   -0.00016    0.00000    0.00000
HKLF 4

REM  11913sadabs_dick_t in Pbcm
REM R1 =  0.0187 for     549 Fo > 4sig(Fo)  and  0.0325 for all     816 data
REM     36 parameters refined using      0 restraints

END

WGHT      0.0220      0.6238

REM Highest difference peak  0.768,  deepest hole -1.883,  1-sigma level  0.260
Q1    1   0.3569  0.0828  0.5041  11.00000  0.05    0.77
Q2    1   0.8560  0.2500  0.5000  10.50000  0.05    0.65
Q3    1   0.3826  0.1885  0.3617  11.00000  0.05    0.62
Q4    1   0.8350  0.0703  0.4956  11.00000  0.05    0.59
Q5    1   1.0854 -0.0568  0.7500  10.50000  0.05    0.58
Q6    1   1.1219 -0.0525  0.5558  11.00000  0.05    0.54
Q7    1   1.0850  0.0076  0.5122  11.00000  0.05    0.53
Q8    1   0.7107  0.0225  0.7500  10.50000  0.05    0.53
Q9    1   0.6163  0.4602  1.0027  11.00000  0.05    0.53
Q10   1   0.5595  0.4351  0.8866  11.00000  0.05    0.51
Q11   1   0.6893  0.4711  0.7500  10.50000  0.05    0.50
Q12   1   0.3768  0.1846  0.6391  11.00000  0.05    0.49
Q13   1   0.7400 -0.0063  0.5876  11.00000  0.05    0.49
Q14   1   0.6524  0.3346  1.0018  11.00000  0.05    0.48
Q15   1   0.7267  0.0578  0.5150  11.00000  0.05    0.48
Q16   1   0.5580  0.5114  0.7500  10.50000  0.05    0.48
Q17   1   0.6442  0.4643  0.9536  11.00000  0.05    0.48
Q18   1   0.7944  0.1318  0.4998  11.00000  0.05    0.47
Q19   1   1.1004  0.0821  0.7049  11.00000  0.05    0.47
Q20   1   0.8450  0.1346  0.6893  11.00000  0.05    0.46
;
_shelx_res_checksum              97599
_shelx_hkl_file                  
;
   0  -1   0    0.50    0.18
   0  -1   0    0.50    0.15
   0   1   0   -0.07    0.14
   0  -1   0    0.57    0.18
   0  -2   0  994.09   19.44
   0  -2   0  974.26   19.72
   0   2   0  946.93   19.70
   0   3   0    0.39    0.36
   0  -3   0    0.40    0.32
   0   3   0    0.62    0.40
   0  -3   0   -0.30    0.38
   0  -4   0  432.00   10.10
   0  -4   0  401.55    9.36
   0   4   0  423.28   10.06
   0  -5   0   -0.49    0.51
   0   5   0    0.87    0.55
   0  -5   0    0.32    0.52
   0   6   0  341.71    9.63
   0  -6   0  350.23    9.63
   0   7   0    1.16    0.83
   0  -7   0    0.17    0.69
   0   8   0  219.03    7.99
   0  -8   0  217.90    7.92
   0   9   0   -3.12    1.28
   0  -9   0   -0.32    1.02
   0   0  -1    0.18    0.13
   0   0   1    0.16    0.13
   0   0  -1    0.03    0.12
   0   0  -1    0.05    0.08
   0   0   1    0.00    0.14
   0   0   1    0.24    0.15
   0  -1   1    0.19    0.15
   0   1   1   -0.13    0.18
   0  -1  -1   -0.11    0.15
   0   1  -1   -0.03    0.18
   0   1  -1   -0.03    0.12
   0  -1  -1    0.12    0.18
   0  -1   1    0.14    0.20
   0  -1  -1   -0.08    0.16
   0   1  -1   -0.06    0.12
   0  -1   1   -0.22    0.16
   0   1   1   -0.07    0.20
   0   1  -1    0.32    0.21
   0  -1  -1    0.03    0.20
   0   1   1    0.01    0.16
   0   1  -1    0.13    0.17
   0   1   1    0.46    0.23
   0   2  -1   15.31    0.84
   0  -2   1   14.95    0.85
   0  -2  -1   15.02    0.86
   0  -2   1   13.36    0.73
   0  -2  -1   14.19    0.90
   0   2   1   14.18    0.89
   0   2  -1   15.10    0.80
   0   2  -1   14.40    0.81
   0  -2  -1   14.60    0.81
   0  -2  -1   14.65    0.88
   0   2   1   15.26    0.85
   0   3  -1    0.61    0.40
   0  -3   1    0.68    0.31
   0   3  -1    0.11    0.34
   0   3   1   -0.66    0.45
   0  -3   1    0.32    0.35
   0  -3  -1    0.61    0.47
   0  -4  -1   -0.15    0.39
   0   4  -1   -0.27    0.36
   0  -4   1   -0.06    0.27
   0  -4   1   -0.90    0.43
   0   4   1   -0.55    0.46
   0  -5   1    0.62    0.36
   0  -5  -1    0.10    0.39
   0   5   1   -0.35    0.62
   0  -5   1    0.70    0.48
   0   5  -1   -0.36    0.48
   0  -5  -1   -0.72    0.58
   0  -5   1    1.31    0.57
   0  -6  -1    4.04    1.00
   0  -6   1    1.86    0.69
   0  -6  -1    3.06    0.73
   0   6  -1    2.82    0.81
   0   6   1    2.26    0.84
   0  -7  -1   -0.63    0.59
   0   7   1    0.72    0.76
   0  -7  -1   -1.04    0.78
   0  -7   1   -1.09    0.75
   0   7  -1    0.13    0.61
   0  -8  -1   -0.98    0.76
   0   8  -1    0.56    0.83
   0   8   1    0.99    0.91
   0  -8   1    1.05    0.92
   0  -8  -1   -1.46    0.96
   0  -9  -1   -0.39    1.09
   0   9  -1    1.23    1.22
   0   9   1    0.52    1.07
   0  -9   1    0.20    1.29
   0   0  -2  430.03    8.99
   0   0   2  437.15    9.26
   0   0  -2  431.30    9.16
   0   0   2  426.25    9.06
   0   0   2  425.62    9.12
   0   0  -2  425.89    9.23
   0   1  -2   -0.06    0.31
   0  -1   2   -0.02    0.27
   0  -1   2    0.28    0.13
   0   1  -2    0.05    0.30
   0   1  -2   -0.19    0.32
   0  -1   2    0.20    0.31
   0  -1  -2    0.24    0.19
   0   1  -2    0.31    0.13
   0  -1   2    1.06    0.34
   0  -1   2    0.41    0.31
   0  -1  -2    0.23    0.27
   0   1   2   -0.05    0.20
   0   1   2    0.45    0.33
   0   1   2    0.08    0.20
   0  -1  -2    0.28    0.20
   0  -1  -2   -0.08    0.29
   0   1   2    0.60    0.34
   0  -2   2  716.07   15.30
   0   2  -2  738.42   15.30
   0  -2   2  774.03   14.98
   0   2  -2  734.99   15.48
   0  -2  -2  736.07   15.76
   0   2  -2  717.33   15.35
   0  -2  -2  724.31   15.29
   0  -2  -2  767.55   15.41
   0  -2   2  731.09   15.19
   0   2   2  727.17   15.26
   0  -2  -2  703.73   15.57
   0  -2  -2  719.42   15.25
   0   2  -2  753.84   14.98
   0   2   2  732.74   15.09
   0   2  -2  707.81   15.98
   0   3   2    0.35    0.39
   0   3  -2    0.29    0.34
   0  -3   2   -0.34    0.46
   0  -3  -2    0.77    0.45
   0  -3   2   -0.12    0.30
   0   3  -2   -0.42    0.35
   0   3  -2    0.18    0.32
   0  -3  -2    0.73    0.48
   0  -3  -2    0.26    0.45
   0   3  -2   -0.56    0.36
   0  -4  -2  706.56   15.37
   0   4  -2  660.24   14.95
   0  -4  -2  693.96   15.28
   0   4   2  706.83   15.37
   0  -4   2  691.10   15.06
   0  -4   2  641.50   14.36
   0  -4  -2  668.42   14.88
   0   4  -2  662.37   14.75
   0  -5  -2    0.41    0.44
   0   5  -2   -0.50    0.51
   0  -5  -2    0.29    0.53
   0  -5   2    0.09    0.43
   0   5  -2    0.04    0.44
   0  -5   2   -0.56    0.45
   0  -6  -2  292.66    8.69
   0   6   2  279.17    8.45
   0  -6   2  288.68    7.12
   0  -6   2  280.64    8.22
   0   6  -2  282.64    7.60
   0   6  -2  272.97    8.13
   0  -6  -2  280.58    7.77
   0  -7  -2    0.60    0.65
   0   7   2    0.93    0.78
   0  -7  -2    0.23    0.68
   0   7  -2    0.35    0.71
   0  -8   2  112.59    5.29
   0   8   2  115.14    5.51
   0  -8  -2  118.22    5.57
   0  -8  -2  114.16    4.66
   0   8  -2  117.03    5.33
   0   9  -2   -0.15    1.21
   0   9   2   -0.35    1.08
   0  -9  -2    0.89    1.09
   0   0  -3    0.47    0.37
   0   0  -3    0.13    0.30
   0   0  -3   -0.19    0.38
   0   1  -3    0.56    0.42
   0  -1  -3    0.22    0.22
   0  -1  -3    0.10    0.18
   0   1   3   -0.15    0.34
   0   1   3    0.49    0.23
   0  -1  -3   -0.24    0.33
   0   1  -3   -0.13    0.41
   0  -1   3    0.78    0.41
   0   1  -3    0.17    0.40
   0  -1  -3   -0.45    0.43
   0  -1  -3   -0.54    0.43
   0   2   3    6.50    0.66
   0   2  -3    7.86    0.80
   0  -2   3    6.20    0.49
   0   2   3    5.89    0.63
   0  -2  -3    5.57    0.60
   0  -2   3    5.93    0.77
   0   2  -3    6.04    0.72
   0  -2  -3    5.84    0.75
   0  -2  -3    6.19    0.65
   0   2  -3    5.41    0.48
   0   2  -3    6.13    0.50
   0  -2  -3    6.91    0.78
   0  -2  -3    6.18    0.67
   0   3  -3    0.72    0.47
   0  -3  -3    1.26    0.58
   0   3  -3    0.64    0.34
   0   3   3    0.20    0.35
   0   3   3    0.26    0.36
   0   3  -3   -0.45    0.51
   0  -3   3   -0.67    0.59
   0   3  -3   -0.61    0.32
   0  -3   3    0.11    0.27
   0  -3  -3   -0.17    0.34
   0   4  -3    0.56    0.45
   0  -4   3   -0.04    0.47
   0  -4   3    0.26    0.38
   0  -4  -3   -0.73    0.54
   0   4   3    0.44    0.49
   0   4  -3    0.69    0.44
   0  -4   3    0.45    0.39
   0  -4  -3    0.53    0.47
   0  -5   3    0.14    0.44
   0  -5   3   -0.45    0.41
   0   5   3   -0.38    0.59
   0  -5  -3    0.99    0.57
   0  -5  -3   -0.33    0.64
   0   5  -3    0.59    0.54
   0   5  -3   -0.36    0.50
   0   6  -3    0.79    0.62
   0  -6   3    1.30    0.48
   0  -6  -3    0.48    0.59
   0   6   3    2.05    0.79
   0   6  -3    1.90    0.70
   0  -6  -3    2.37    0.82
   0  -6   3    1.40    0.67
   0  -7   3   -0.94    0.78
   0   7   3    0.51    0.76
   0   7  -3    0.15    0.76
   0  -7  -3   -0.85    0.75
   0  -7  -3    1.85    0.90
   0  -8  -3    1.53    1.03
   0   8   3    0.45    0.89
   0  -8  -3    2.95    1.19
   0   8  -3    1.30    0.96
   0   9  -3    0.17    1.02
   0  -9  -3    0.55    1.18
   0   9   3    1.76    1.30
   0   0  -4  973.04   20.77
   0   0  -4  966.80   20.58
   0   0  -4  976.93   20.21
   0   1  -4    1.52    0.51
   0   1  -4    0.10    0.42
   0  -1  -4    0.95    0.37
   0  -1  -4    0.56    0.48
   0   1   4    0.47    0.26
   0  -1  -4    0.50    0.20
   0   1   4    0.33    0.46
   0  -1  -4    0.81    0.51
   0   1  -4    0.67    0.58
   0  -1   4   -0.07    0.33
   0   2  -4  593.26   12.34
   0   2  -4  609.38   13.48
   0  -2  -4  591.82   12.86
   0   2   4  594.20   12.98
   0  -2   4  608.33   12.80
   0   2  -4  601.20   13.38
   0  -2  -4  583.82   12.77
   0  -2  -4  611.29   13.60
   0  -2   4  602.45   13.63
   0   2   4  567.34   12.81
   0   3  -4    0.40    0.30
   0   3  -4   -0.09    0.46
   0  -3  -4    0.46    0.49
   0   3  -4    0.00    0.37
   0   3   4   -0.18    0.36
   0  -3   4    0.22    0.28
   0   3  -4   -0.06    0.28
   0  -3  -4    0.11    0.39
   0  -3   4    0.29    0.52
   0  -3  -4   -0.08    0.33
   0   4  -4  303.74    7.61
   0   4  -4  314.40    8.20
   0  -4   4  322.98    8.52
   0   4   4  304.40    8.24
   0  -4  -4  318.73    8.30
   0  -4  -4  300.75    8.29
   0  -4   4  321.89    7.75
   0  -5  -4    0.98    0.64
   0  -5   4    0.32    0.49
   0   5  -4   -0.67    0.58
   0   5  -4   -0.33    0.53
   0   5   4    0.31    0.57
   0  -5   4    1.94    0.65
   0  -5  -4    0.04    0.54
   0  -6  -4  253.04    7.96
   0   6  -4  246.01    7.17
   0  -6  -4  243.76    7.55
   0   6   4  251.98    7.94
   0   6  -4  251.20    7.38
   0   7  -4   -1.13    0.82
   0  -7  -4    1.53    0.88
   0   7   4   -0.76    0.85
   0  -7  -4    1.44    0.92
   0   8   4  165.54    7.05
   0  -8  -4  163.77    6.27
   0   8  -4  169.26    6.51
   0  -8  -4  164.53    6.92
   0   9   4    1.28    1.75
   0  -9  -4    2.86    2.60
   0   9  -4    1.24    1.51
   0   0  -5   -0.07    0.49
   0   0  -5    0.56    0.56
   0   0  -5    1.05    0.49
   0   1  -5    1.66    0.54
   0  -1  -5    0.05    0.24
   0   1   5    0.24    0.27
   0  -1  -5   -0.41    0.36
   0   1  -5    0.86    0.56
   0   1  -5    0.32    0.57
   0  -1  -5   -0.45    0.53
   0  -1  -5   -0.01    0.47
   0   1   5    0.22    0.55
   0  -1   5   -0.09    0.46
   0  -2   5    1.40    0.59
   0   2  -5    1.27    0.56
   0  -2  -5    2.12    0.43
   0  -2  -5    1.92    0.44
   0   2   5    1.78    0.50
   0  -2  -5    1.77    0.63
   0   2  -5    2.30    0.67
   0  -2  -5    0.76    0.47
   0   2   5    2.81    0.53
   0   3  -5    0.28    0.55
   0   3  -5    0.19    0.27
   0   3   5    0.06    0.40
   0  -3  -5    0.42    0.47
   0  -3  -5   -0.70    0.63
   0  -3   5    0.27    0.27
   0   3   5    0.09    0.41
   0  -3   5   -0.09    0.54
   0  -3  -5   -0.75    0.48
   0   3  -5    0.12    0.49
   0   4  -5   -0.90    0.63
   0   4   5   -1.20    0.59
   0  -4  -5    0.00    0.64
   0  -4  -5   -0.28    0.50
   0   4  -5   -0.31    0.38
   0   4  -5    0.02    0.61
   0  -4  -5   -0.15    0.48
   0  -4   5   -1.94    1.03
   0  -5  -5    0.52    0.59
   0  -5  -5    0.20    0.61
   0  -5  -5    0.88    0.75
   0  -5   5    2.50    0.86
   0   5   5   -0.11    0.62
   0   5  -5   -0.65    0.54
   0   5  -5    0.54    0.67
   0  -6  -5    1.90    0.89
   0   6   5   -1.42    0.91
   0   6  -5    0.57    0.67
   0  -6  -5    1.12    0.85
   0   6  -5    0.24    0.68
   0  -7  -5   -1.02    1.02
   0  -7  -5   -0.99    0.89
   0   7   5    1.00    1.00
   0   7  -5    0.77    0.79
   0  -8  -5    2.64    1.26
   0  -8  -5    0.62    1.13
   0   8   5   -0.04    1.77
   0   8  -5    0.81    1.49
   0   0  -6  279.49    7.34
   0   0   6  280.65    8.48
   0   0  -6  268.17    7.89
   0   0  -6  276.86    8.14
   0  -1   6    0.25    0.60
   0   1  -6    1.20    0.56
   0  -1  -6    1.33    0.77
   0  -1  -6    0.95    0.54
   0   1  -6    0.01    0.60
   0   1  -6    0.35    0.64
   0   1   6    0.79    0.61
   0   2  -6  327.46    9.14
   0  -2   6  312.02    9.00
   0   2  -6  315.42    8.57
   0  -2  -6  324.26    7.96
   0  -2  -6  309.68    8.86
   0   2   6  314.63    7.87
   0   2  -6  320.24    8.89
   0  -2  -6  317.74    7.60
   0  -3  -6   -0.06    0.70
   0  -3  -6   -0.45    0.50
   0   3  -6    0.39    0.61
   0  -3   6   -1.11    0.80
   0   3   6    0.10    0.41
   0   3  -6    1.74    0.81
   0  -3  -6    1.28    0.56
   0   4  -6  300.87    6.94
   0  -4  -6  294.08    8.07
   0  -4  -6  284.24    8.68
   0   4  -6  297.84    8.50
   0  -4  -6  292.65    7.51
   0   4  -6  296.56    8.67
   0  -4   6  282.65    9.03
   0  -5  -6   -0.41    0.75
   0  -5  -6   -0.23    0.77
   0   5  -6    0.94    0.55
   0   5  -6   -1.00    0.81
   0  -6  -6  147.33    6.05
   0   6  -6  152.12    5.15
   0  -6  -6  160.60    6.15
   0   6  -6  162.50    5.96
   0  -7  -6    2.54    1.17
   0  -7  -6    0.05    1.31
   0   7  -6    0.13    0.84
   0  -8  -6   63.80    4.08
   0   8  -6   67.64    3.86
   0  -8  -6   70.02    4.52
   0   0   7    1.70    1.10
   0   0  -7   -0.82    0.62
   0   0  -7    0.40    0.76
   0   0  -7   -1.19    0.82
   0   0   7    0.51    0.71
   0  -1  -7   -0.25    0.75
   0   1  -7    0.45    0.60
   0   1  -7    0.59    0.68
   0   1   7    0.39    0.63
   0  -1   7    0.07    0.67
   0   1  -7   -0.10    0.72
   0  -1  -7    0.72    0.61
   0   2  -7   -0.10    0.65
   0  -2  -7    0.19    0.44
   0   2   7   -0.73    0.75
   0  -2  -7    0.73    0.72
   0   2  -7    0.17    0.69
   0  -2  -7    0.66    0.58
   0  -2   7    1.44    0.85
   0  -3  -7   -1.12    0.59
   0   3  -7    0.60    0.82
   0   3  -7   -0.08    0.67
   0  -3  -7    0.22    0.77
   0  -3  -7   -0.62    0.57
   0  -3   7    0.52    0.88
   0  -4  -7    0.48    0.78
   0  -4   7    0.10    0.90
   0  -4  -7    0.94    0.70
   0   4  -7   -0.28    0.77
   0   4  -7    1.15    0.96
   0  -5  -7   -0.04    0.74
   0   5  -7    0.00    0.84
   0  -5  -7   -1.06    0.90
   0  -6  -7   -0.88    1.07
   0  -6  -7    1.30    1.01
   0   6  -7    0.76    1.03
   0  -7  -7    1.18    1.18
   0  -7  -7   -1.61    1.82
   0   0   8  268.86    9.05
   0   0  -8  278.58    8.99
   0   0  -8  278.21    8.95
   0   0  -8  258.15    7.68
   0  -1  -8    2.21    0.78
   0   1  -8   -0.79    1.02
   0  -1   8    1.26    0.90
   0   1  -8    0.61    0.92
   0  -1  -8   -0.83    0.91
   0   1  -8    1.21    0.77
   0   2  -8  210.16    7.46
   0  -2  -8  208.57    6.23
   0  -2  -8  209.10    7.43
   0  -2   8  205.57    7.80
   0   2  -8  215.79    7.00
   0  -3  -8    1.65    0.83
   0   3  -8    0.06    0.86
   0  -3   8    0.31    1.18
   0  -3  -8   -1.27    0.95
   0  -4  -8  131.99    4.84
   0   4  -8  127.55    5.64
   0  -4  -8  134.52    5.95
   0  -5  -8   -0.99    1.21
   0  -5  -8    1.31    1.02
   0   5  -8   -2.38    1.25
   0  -6  -8  101.80    5.33
   0  -6  -8   98.71    4.83
   0   0  -9    1.35    0.86
   0   0  -9   -0.25    1.08
   0   0   9    1.68    1.16
   0   1   9    2.93    1.28
   0  -1   9    2.61    1.25
   0   1  -9   -0.03    0.87
   0   1  -9    1.34    1.03
   0  -1  -9   -0.07    1.07
   0   1  -9   -2.33    1.38
   0  -1  -9    1.74    1.10
   0  -2   9    1.80    1.31
   0  -2  -9    2.45    1.30
   0   2  -9   -0.14    1.03
   0   2  -9   -0.51    0.91
   0   3  -9   -0.47    1.00
   0  -3  -9   -0.59    1.19
   0  -3   9   -0.11    1.90
   0   3  -9   -0.56    1.06
   0   4  -9    0.00    1.24
   0  -4  -9   -0.40    1.16
   0  -5  -9    0.66    1.68
   0   5  -9   -0.62    2.28
   0   0 -10   93.55    5.24
   0   0  10   86.69    5.30
   0   1  10    1.15    1.35
   0   1 -10    0.34    1.02
   0   1 -10   -1.79    1.59
   0  -1 -10   -0.66    1.28
   0  -1  10    1.49    1.35
   0   2  10   99.36    5.72
   0  -2 -10   92.07    5.28
   0   2 -10   91.77    5.23
   0   2 -10   86.78    4.55
   0  -2  10   92.57    5.69
   0   3 -10    1.47    1.42
   0  -3 -10    1.25    1.32
   0   3 -10   -0.54    1.26
   0  -4 -10   84.34    5.23
   0   4 -10   86.00    5.01
   0   0 -11    2.71    1.71
   0   0  11    2.82    1.79
   0   1  11   -2.49    1.69
   0  -1  11    1.34    2.25
   0  -1 -11   -2.26    1.77
   1  -1   0  661.83   13.08
   1   1   0  646.02   13.05
  -1   1   0  649.80   12.72
  -1  -1   0  626.37   13.01
  -1  -1   0  628.74   12.99
   1  -1   0  654.73   13.09
   1   1   0  635.41   13.00
  -1   1   0  664.58   13.09
  -1   1   0  637.53   13.03
   1  -1   0  616.39   13.03
  -1   1   0  663.42   13.08
  -1   1   0  607.19   12.98
   1  -2   0  156.70    4.04
   1   2   0  162.60    4.08
  -1   2   0  159.17    4.07
   1  -2   0  165.49    3.69
  -1  -2   0  156.61    4.05
  -1   2   0  153.47    4.01
   1   2   0  153.67    3.99
   1  -2   0  154.56    3.99
   1   2   0  166.77    3.59
   1   3   0  668.93   14.51
  -1  -3   0  684.29   14.55
   1  -3   0  650.37   14.40
   1  -3   0  674.68   14.28
   1   3   0  661.68   15.03
  -1   3   0  666.99   14.44
   1  -4   0  132.16    4.22
   1   4   0  126.78    4.24
  -1  -4   0  134.07    4.32
   1  -4   0  125.64    3.90
  -1   4   0  126.85    4.14
  -1  -5   0  348.10    9.17
   1  -5   0  348.14    9.06
   1  -5   0  338.92    8.50
  -1   5   0  340.30    9.01
   1   5   0  334.29    9.09
   1  -6   0   65.67    2.90
   1  -6   0   63.41    3.30
   1   6   0   64.36    3.36
  -1  -6   0   60.83    3.24
  -1   6   0   64.27    3.32
  -1  -6   0   65.94    2.52
   1   7   0  161.89    6.17
   1  -7   0  159.00    6.11
   1  -7   0  160.88    6.20
  -1  -7   0  162.51    4.91
  -1   7   0  159.66    6.12
  -1  -7   0  161.30    6.20
  -1  -8   0   22.95    2.33
  -1   8   0   24.42    2.42
   1  -8   0   17.22    2.12
   1   8   0   27.57    2.55
  -1  -9   0   93.07    5.23
   1   9   0   99.10    5.29
   1  -9   0   81.08    4.97
  -1   9   0   92.43    5.24
  -1   0   1   -0.06    0.25
   1   0   1   -0.35    0.25
  -1   0   1    0.10    0.14
   1   0   1    0.07    0.12
   1   0  -1    0.04    0.19
   1   0   1    0.25    0.46
  -1   0  -1   -0.04    0.27
  -1   0   1   -0.02    0.27
  -1   0  -1   -0.07    0.25
  -1   0   1   -0.03    0.13
   1   0   1    0.30    0.30
   1   0   1    0.15    0.25
   1   0  -1   -0.16    0.12
   1   0  -1   -0.03    0.12
  -1   0  -1   -0.49    0.40
  -1   0  -1   -0.06    0.24
  -1   0  -1    0.61    0.27
   1   0   1    0.14    0.39
   1  -1   1    0.05    0.24
  -1   1   1    0.44    0.22
  -1   1   1    0.84    0.39
   1  -1   1    0.43    0.27
   1  -1   1    0.77    0.26
   1  -1   1    0.07    0.23
  -1   1   1    0.69    0.26
  -1   1   1    0.18    0.16
   1  -1   1    0.28    0.19
   1   1  -1    0.60    0.25
   1   1  -1    0.67    0.19
  -1   1   1    0.71    0.29
  -1  -1  -1    0.64    0.22
   1   1  -1    0.55    0.15
  -1  -1  -1    0.39    0.24
   1  -1   1    1.16    0.42
  -1  -1  -1    0.83    0.30
  -1   1  -1    0.69    0.33
   1   1   1    0.56    0.30
  -1  -1   1    0.10    0.24
   1  -1  -1    0.47    0.30
   1   1   1    0.53    0.22
  -1   1  -1    0.44    0.16
   1  -1  -1    0.22    0.21
  -1   1  -1    0.28    0.22
   1   1   1    0.48    0.26
   1  -1  -1    0.26    0.33
   1  -1  -1    0.51    0.25
  -1   2   1   37.37    1.52
   1  -2   1   38.51    1.60
   1   2  -1   36.43    1.43
  -1  -2  -1   39.05    1.33
  -1  -2  -1   37.31    1.55
  -1   2   1   37.33    1.26
   1  -2   1   38.54    1.49
  -1   2   1   36.65    1.58
   1   2  -1   37.56    1.42
  -1   2  -1   37.36    1.62
  -1   2  -1   33.25    1.41
   1  -2  -1   36.84    1.53
  -1   2  -1   38.11    1.16
   1  -2  -1   39.24    1.55
   1   2   1   38.08    1.58
  -1   2  -1   35.68    1.44
  -1  -2   1   37.33    1.45
  -1   2  -1   38.93    1.47
   1  -2  -1   35.69    1.49
   1   3  -1    0.17    0.27
   1   3  -1   -0.26    0.36
  -1   3   1   -0.45    0.48
   1  -3   1    0.61    0.40
  -1  -3  -1    0.32    0.37
   1  -3   1   -0.65    0.51
  -1   3   1    0.31    0.35
  -1  -3  -1    0.05    0.28
  -1   3  -1    0.40    0.38
   1  -3  -1    0.11    0.23
  -1  -3   1   -0.18    0.35
   1   3   1    0.61    0.41
   1  -3  -1    0.74    0.49
   1  -3  -1    0.64    0.40
  -1  -3   1    0.08    0.17
  -1   3  -1    0.22    0.25
  -1   3  -1    0.38    0.37
  -1  -4  -1    0.25    0.42
  -1   4   1    1.03    0.54
   1   4  -1    0.84    0.37
   1  -4   1    0.20    0.38
   1   4  -1    0.08    0.36
  -1  -4  -1    0.35    0.32
   1  -4  -1   -0.83    0.53
  -1   4  -1    0.28    0.42
   1  -4  -1   -0.17    0.38
   1   4   1   -0.01    0.41
  -1  -4   1   -0.06    0.34
  -1  -5  -1    0.61    0.37
  -1  -5  -1    1.88    0.70
  -1   5   1    0.28    0.52
   1  -5   1    0.86    0.55
   1   5  -1    0.05    0.55
   1  -5   1    0.61    0.45
   1   5   1    0.23    0.51
  -1  -5   1    1.01    0.58
   1  -5  -1    0.58    0.58
  -1   5  -1    0.31    0.54
  -1  -6  -1    4.22    0.97
  -1   6   1    2.57    0.84
  -1  -6  -1    2.36    0.60
   1  -6   1    2.07    0.80
   1  -6   1    4.25    0.81
   1   6  -1    2.38    0.80
   1  -6  -1    3.12    0.90
   1   6   1    4.04    0.96
  -1  -6   1    2.65    0.83
  -1   6  -1    4.16    0.94
   1  -7   1   -0.64    0.72
  -1  -7  -1    0.62    0.79
   1  -7   1   -1.14    0.87
   1  -7   1   -0.22    0.57
   1   7  -1    0.44    0.68
  -1  -7  -1    0.91    0.57
  -1   7   1    0.01    0.70
   1  -7  -1   -0.84    0.64
   1   7   1    0.48    0.79
   1  -7  -1    0.33    0.66
  -1  -7   1   -0.46    0.64
  -1   8   1   -0.80    0.98
   1   8  -1   -1.10    1.01
  -1  -8  -1    0.52    0.84
   1  -8   1   -0.36    0.82
  -1   8  -1    0.07    0.79
  -1  -8   1    1.48    0.99
   1  -8  -1    0.10    0.74
   1  -8  -1    0.84    1.06
   1   8   1    0.08    0.80
  -1  -9  -1    1.90    1.29
   1   9  -1   -0.16    1.12
   1  -9   1    1.37    1.22
  -1   9   1   -3.61    1.46
  -1  -9   1    0.49    1.35
  -1   9  -1   -0.49    1.11
   1   9   1   -0.36    1.15
   1  -9  -1   -0.91    1.16
  -1   0   2  216.15    4.55
   1   0  -2  213.02    4.99
  -1   0   2  216.24    4.78
  -1   0   2  214.60    5.20
   1   0   2  214.12    5.16
  -1   0  -2  226.80    5.37
  -1   0  -2  217.51    4.93
   1   0   2  231.27    4.99
   1   0  -2  215.54    4.54
   1   0  -2  213.43    5.21
  -1   0  -2  221.53    5.25
   1   0   2  206.86    5.18
   1   0   2  212.25    5.22
  -1   0  -2  221.88    5.23
   1   0   2  223.88    5.37
   1   0  -2  220.41    4.74
  -1   0   2  211.55    4.83
  -1   0   2  219.18    4.96
   1   0   2  219.20    5.27
  -1   1   2  907.50   18.77
   1  -1   2  911.20   19.48
  -1   1   2  867.75   19.64
  -1  -1  -2  951.95   19.13
   1   1  -2  952.78   19.33
   1  -1   2  930.29   19.77
  -1   1   2  888.36   19.06
   1   1  -2  958.19   18.90
   1  -1   2  968.92   18.77
   1   1  -2  941.91   18.98
  -1  -1  -2  933.57   18.98
  -1   1  -2  947.01   19.23
  -1  -1   2  983.31   19.52
   1   1   2  926.89   19.13
  -1  -1   2  962.30   19.04
  -1   1  -2  909.03   19.26
   1  -1  -2  889.45   19.92
  -1   1  -2  946.49   18.98
   1  -1  -2  943.46   18.79
  -1   1  -2  942.47   19.21
  -1   1  -2  922.66   18.74
   1  -1  -2  945.86   19.73
   1   1   2  934.32   18.97
   1  -1  -2  913.62   20.06
   1  -1  -2  974.83   19.19
  -1  -1   2 1000.00   19.27
   1  -1  -2  984.68   19.25
  -1  -2  -2  128.95    3.58
  -1  -2  -2  132.42    3.71
   1   2  -2  138.44    3.91
   1   2  -2  131.87    3.42
  -1   2   2  138.44    3.67
   1  -2   2  136.48    4.04
  -1  -2  -2  134.80    3.32
   1   2  -2  132.76    3.38
   1  -2   2  135.54    3.50
   1  -2   2  134.69    3.57
  -1  -2  -2  136.81    3.69
  -1   2   2  133.88    3.84
   1  -2  -2  129.82    3.61
  -1   2  -2  134.62    3.74
  -1  -2   2  134.71    3.29
  -1   2  -2  136.54    3.44
  -1   2  -2  130.38    3.50
   1  -2  -2  138.96    3.69
  -1  -2   2  136.12    3.42
  -1  -2   2  133.97    3.29
  -1   2  -2  135.44    3.49
   1   2   2  129.43    3.71
   1  -2  -2  138.70    3.83
  -1   3   2  506.18   11.39
  -1  -3  -2  519.60   11.18
   1   3  -2  495.43   13.29
  -1   3   2  509.50   11.51
   1   3  -2  465.69   12.32
   1   3  -2  509.49   11.22
  -1  -3  -2  516.07   11.53
   1  -3   2  532.57   11.27
   1  -3   2  513.74   11.59
  -1  -3   2  491.72   10.37
  -1   3  -2  521.83   11.44
  -1  -3   2  512.89   11.17
   1  -3  -2  499.47   11.35
  -1   3  -2  520.52   10.89
   1  -3  -2  499.43   11.39
  -1  -3   2  495.25   11.26
   1   3   2  495.74   11.47
  -1   3  -2  512.11   11.21
   1   4  -2   60.67    1.91
   1   4  -2   62.28    2.57
  -1  -4  -2   60.58    2.38
  -1   4   2   62.16    2.70
   1  -4   2   61.65    2.52
   1  -4   2   62.41    2.58
  -1  -4  -2   60.33    2.72
  -1   4  -2   58.22    2.14
   1  -4  -2   58.63    2.62
  -1  -4   2   60.35    2.53
  -1  -4   2   62.25    1.83
   1  -4  -2   62.83    2.59
   1   4   2   60.61    2.76
  -1   4  -2   62.26    2.56
   1  -5   2  350.47    8.65
   1   5  -2  344.43    9.06
  -1   5   2  335.46    9.21
  -1  -5  -2  341.01    8.51
  -1  -5  -2  344.08    9.31
   1  -5   2  350.75    9.05
  -1   5  -2  349.42    8.18
  -1   5  -2  358.19    9.07
  -1  -5   2  338.98    8.97
   1  -5  -2  350.42    9.35
   1  -5  -2  350.19    8.92
   1   5   2  352.17    9.34
  -1  -5   2  334.77    7.60
  -1  -6  -2   37.65    2.06
   1   6  -2   37.78    2.42
  -1   6   2   39.94    2.62
   1  -6   2   41.07    2.53
   1  -6   2   36.81    2.08
  -1  -6  -2   35.26    2.50
   1   6   2   38.85    2.59
  -1  -6   2   38.69    2.47
  -1   6  -2   38.31    1.91
   1  -6  -2   36.51    2.56
   1  -6  -2   40.28    2.41
  -1   6  -2   38.63    2.45
   1  -6  -2   37.96    2.58
  -1  -7  -2  215.01    7.58
   1  -7   2  215.33    6.40
  -1  -7  -2  217.31    6.50
   1   7  -2  225.43    6.99
  -1   7   2  213.75    7.61
   1  -7   2  219.99    7.38
   1   7  -2  226.80    7.44
   1  -7  -2  220.24    7.03
  -1   7  -2  222.64    7.54
  -1  -7   2  226.13    7.41
   1   7   2  223.30    7.73
   1  -7  -2  214.38    7.57
  -1  -8  -2   25.31    2.56
   1  -8   2   25.00    2.55
   1   8  -2   31.46    2.67
  -1   8   2   33.74    2.92
  -1   8  -2   26.52    2.51
  -1  -8   2   24.37    2.45
   1   8   2   27.92    2.62
   1  -8  -2   27.07    2.29
   1  -8  -2   24.21    2.54
   1   9  -2  101.41    5.41
  -1   9   2   86.11    5.30
  -1  -9  -2  104.67    5.74
  -1   9  -2  105.96    5.49
   1  -9  -2  103.35    5.63
   1   9   2   95.57    5.51
   1   0   3    0.54    0.26
  -1   0  -3   -1.08    0.53
   1   0  -3    0.63    0.48
   1   0  -3    0.45    0.38
  -1   0  -3    0.29    0.42
  -1   0   3   -0.03    0.29
   1   0   3    0.02    0.40
   1   0  -3    0.13    0.26
   1   0   3   -1.02    0.49
  -1   0  -3   -0.41    0.44
   1   1  -3   -0.10    0.42
  -1  -1  -3    0.61    0.41
  -1   1   3    1.18    0.36
  -1  -1  -3    0.05    0.25
   1  -1   3    0.27    0.19
  -1   1   3    0.13    0.21
   1   1  -3    0.49    0.44
   1  -1   3    0.16    0.47
   1   1  -3    0.32    0.33
  -1  -1  -3   -0.14    0.32
  -1  -1  -3    0.28    0.39
  -1   1   3    0.79    0.66
   1  -1  -3    0.51    0.24
  -1   1  -3    0.05    0.47
   1  -1  -3   -0.05    0.19
  -1   1  -3    0.23    0.38
   1   1   3   -0.40    0.33
   1   1   3    0.07    0.16
   1  -1  -3    0.15    0.40
   1  -1  -3    0.47    0.24
   1  -1  -3    0.64    0.40
  -1   1  -3    0.63    0.44
  -1   1  -3    0.07    0.21
  -1   2   3   16.73    1.26
  -1   2   3   16.59    1.01
   1   2  -3   17.93    0.83
   1   2  -3   16.73    1.13
  -1  -2  -3   17.31    0.97
  -1  -2  -3   16.36    1.06
  -1  -2  -3   17.72    1.17
   1  -2   3   16.14    0.88
  -1  -2  -3   18.31    1.11
   1  -2   3   16.82    1.34
   1   2  -3   17.27    1.25
   1   2  -3   16.39    0.85
   1  -2  -3   15.04    0.98
   1  -2  -3   18.54    1.27
   1  -2  -3   17.48    0.81
   1   2   3   16.55    1.08
   1  -2  -3   16.92    1.02
  -1  -2   3   16.66    1.03
  -1   2  -3   17.94    1.09
  -1  -2   3   16.47    0.84
  -1   2  -3   16.86    0.90
  -1   2  -3   17.02    0.97
  -1   2  -3   17.91    1.22
  -1   3   3    0.45    0.34
  -1  -3  -3   -0.62    0.44
  -1  -3  -3   -0.37    0.42
   1   3  -3    0.13    0.27
   1  -3   3    0.09    0.63
   1  -3   3    0.31    0.32
  -1   3   3    0.43    0.44
   1   3  -3    0.28    0.32
   1   3  -3   -0.37    0.46
  -1   3  -3    0.43    0.43
   1   3   3    0.38    0.43
  -1   3  -3    0.17    0.33
  -1  -3   3    0.11    0.27
  -1   3  -3   -0.06    0.31
   1  -3  -3    0.15    0.34
   1  -3  -3   -0.64    0.47
  -1   3  -3    0.33    0.32
  -1  -3   3    0.25    0.41
  -1  -4  -3    0.41    0.41
  -1   4   3   -0.13    0.46
   1  -4   3   -0.73    0.69
   1   4  -3   -0.48    0.39
   1   4  -3    0.25    0.53
  -1   4   3   -0.38    0.51
  -1  -4  -3    0.10    0.50
   1  -4   3    0.50    0.43
  -1   4  -3    0.79    0.56
  -1   4  -3    0.32    0.37
  -1  -4   3   -0.11    0.28
  -1   4  -3   -0.14    0.41
   1  -4  -3    1.32    0.59
   1   4   3    0.17    0.44
   1  -4  -3    0.04    0.45
   1   5  -3    0.76    0.55
   1  -5   3    0.66    0.62
  -1  -5  -3    0.21    0.60
  -1   5   3    0.67    0.56
  -1  -5  -3    1.05    0.55
   1   5  -3    0.18    0.50
   1  -5   3    0.09    0.46
   1  -5  -3    0.03    0.62
  -1  -5   3    0.60    0.53
  -1   5  -3    0.59    0.55
  -1   5  -3    0.32    0.42
   1   5   3    1.26    0.68
   1  -5  -3    0.07    0.50
   1   6  -3    1.83    0.77
  -1  -6  -3    0.85    0.76
  -1   6   3    1.50    0.76
   1  -6   3    3.19    0.79
   1   6  -3    1.54    0.82
   1  -6   3    0.90    0.71
  -1  -6  -3    2.27    0.70
  -1  -6   3    1.72    0.71
  -1   6  -3    2.91    0.67
   1  -6  -3    2.39    0.82
   1  -6  -3    1.41    0.76
   1   6   3    2.02    0.90
  -1   7   3   -1.01    0.81
   1  -7   3   -1.05    0.82
  -1  -7  -3   -0.81    0.78
   1   7  -3   -0.25    0.76
  -1  -7  -3    0.33    0.59
   1   7  -3    0.18    0.94
  -1  -7   3   -1.01    0.77
   1   7   3    1.18    0.85
  -1   7  -3    0.60    0.81
   1  -7  -3    1.38    0.90
   1  -7  -3   -0.87    0.79
   1   8  -3   -0.10    0.94
  -1  -8  -3   -0.63    0.80
  -1   8   3   -0.46    0.96
  -1  -8  -3   -0.36    0.97
  -1   8  -3    0.99    0.92
   1  -8  -3    0.12    0.88
   1  -8  -3   -0.15    0.88
   1   8   3    1.03    1.07
  -1   9   3    1.38    1.80
   1   9  -3   -2.04    1.38
  -1  -9  -3    0.68    1.27
   1  -9  -3    0.06    1.20
  -1   9  -3    0.72    1.12
   1  -9  -3    0.49    1.09
   1   9   3    0.42    1.36
  -1   0  -4   89.71    3.23
  -1   0  -4   89.90    3.26
   1   0   4   84.50    3.27
   1   0  -4   92.17    3.18
  -1   0  -4   88.82    3.11
   1   0  -4   88.71    2.72
   1   0  -4   90.81    3.34
   1   0   4   90.57    2.84
  -1   0  -4   92.06    2.80
  -1   1   4  428.83    9.17
   1   1  -4  432.84   10.02
  -1  -1  -4  445.74    9.58
   1  -1   4  417.40   10.31
  -1   1   4  436.77   11.24
   1   1  -4  427.02   10.30
   1  -1   4  427.18    9.27
  -1  -1  -4  441.28   10.02
  -1  -1  -4  443.42   10.23
   1   1  -4  413.00    9.65
  -1  -1  -4  419.57   10.22
  -1   1  -4  417.32    8.77
   1   1   4  428.53    9.18
  -1   1  -4  421.04   10.09
   1  -1  -4  423.63    9.00
  -1   1  -4  428.87   10.05
   1  -1  -4  418.08    9.24
   1  -1  -4  423.56   10.10
  -1   1  -4  413.29   10.23
   1  -1  -4  436.88   10.35
   1   1   4  448.51    9.59
   1  -1  -4  435.49    9.08
  -1  -2  -4   83.97    2.81
   1   2  -4   97.08    3.51
  -1   2   4   91.24    2.84
  -1  -2  -4   92.45    3.25
   1   2  -4   94.16    3.32
   1   2  -4   94.11    3.18
  -1  -2  -4   85.95    2.94
   1  -2   4   92.70    2.51
   1  -2   4   88.91    3.58
   1   2  -4   90.27    2.40
  -1   2   4   92.69    3.40
  -1  -2  -4   91.03    3.34
   1  -2  -4   95.65    3.44
   1   2   4   94.31    3.05
  -1   2  -4   92.26    2.49
  -1   2  -4   93.00    3.33
   1  -2  -4   88.06    2.53
  -1  -2   4   93.91    3.19
   1   2   4   88.29    2.39
  -1  -2   4   92.71    2.44
   1  -2  -4   90.58    2.83
   1  -2  -4   87.40    2.77
  -1   2  -4   89.46    2.81
  -1   2  -4   90.39    3.17
  -1  -3  -4  425.04   10.09
  -1  -3  -4  393.27    9.72
   1   3  -4  411.57    9.08
   1   3  -4  380.04   10.16
  -1   3   4  405.61    9.87
   1   3  -4  417.66   10.21
  -1  -3  -4  420.60   10.06
   1  -3   4  408.27    9.12
   1  -3   4  397.49   10.52
  -1   3   4  406.07    9.63
   1  -3  -4  416.51    8.90
  -1   3  -4  419.73    9.76
   1   3   4  407.44    9.84
  -1   3  -4  420.26    9.14
  -1   3  -4  405.40   10.09
   1  -3  -4  409.01   10.17
  -1   3  -4  389.52   11.11
  -1  -3   4  397.97    9.72
  -1  -3   4  396.91    9.01
   1  -3  -4  413.84    9.65
   1   4  -4   86.66    3.54
   1   4  -4   83.24    2.98
  -1   4   4   80.34    3.25
  -1   4   4   82.09    3.34
   1  -4   4   83.37    3.01
   1  -4   4   99.60    4.36
  -1  -4  -4   80.07    3.38
  -1  -4  -4   81.13    3.37
  -1   4  -4   81.55    3.49
  -1  -4   4   82.44    2.95
  -1   4  -4   83.24    3.14
   1  -4  -4   78.83    2.64
   1  -4  -4   80.52    3.32
   1  -4  -4   82.99    3.38
  -1   4  -4   83.02    3.00
   1  -4  -4   83.74    3.57
  -1  -4   4   87.84    3.01
   1   4   4   79.86    3.41
   1   5  -4  242.50    7.20
  -1   5   4  244.66    7.30
   1  -5   4  250.18    7.30
   1  -5   4  241.60    6.78
   1   5  -4  240.44    6.72
  -1  -5  -4  242.95    7.11
  -1  -5  -4  256.44    7.49
   1  -5  -4  241.22    7.25
  -1   5  -4  241.94    6.62
  -1  -5   4  226.94    5.77
  -1  -5   4  226.87    6.64
   1  -5  -4  249.21    7.36
   1   5   4  245.53    7.41
  -1   5  -4  243.95    6.80
   1   6  -4   45.97    2.65
  -1   6   4   48.92    3.01
   1   6  -4   49.11    2.82
  -1  -6  -4   45.83    2.94
   1  -6   4   46.65    2.56
  -1  -6  -4   46.91    2.67
   1  -6  -4   43.94    2.91
  -1   6  -4   46.17    2.36
   1   6   4   40.54    2.84
   1  -6  -4   48.06    2.88
  -1   6  -4   44.28    2.64
  -1  -7  -4  123.26    5.56
   1   7  -4  124.19    5.11
  -1   7   4  122.72    5.52
   1   7  -4  125.02    5.05
  -1  -7  -4  120.58    4.89
   1   7   4  118.97    5.52
   1  -7  -4  119.65    5.44
  -1   7  -4  126.63    5.11
   1  -7  -4  127.51    5.23
  -1  -8  -4   18.72    1.97
   1   8  -4   16.95    2.07
  -1   8   4   18.01    2.26
  -1  -8  -4   21.14    2.44
   1  -8  -4   18.29    2.28
   1   8   4   16.99    2.25
   1  -8  -4   14.41    1.95
  -1   8  -4   18.06    2.07
   1   9  -4   65.41    4.22
  -1   9   4   60.55    4.47
  -1  -9  -4   73.91    4.85
  -1   9  -4   72.90    4.37
   1   9   4   64.75    4.68
   1  -9  -4   64.61    3.98
   1  -9  -4   66.59    4.54
   1   0  -5   -0.04    0.33
  -1   0  -5    0.52    0.60
   1   0  -5    0.40    0.49
  -1   0  -5    0.04    0.51
   1   0   5    0.55    0.54
  -1   0  -5    0.09    0.44
   1   0  -5    0.58    0.59
  -1  -1  -5   -0.29    0.26
   1   1  -5    0.03    0.44
  -1  -1  -5   -0.01    0.33
   1  -1   5    0.10    0.48
   1   1  -5   -0.53    0.40
  -1  -1  -5   -0.32    0.48
  -1   1   5   -0.38    0.24
  -1   1   5   -0.64    0.67
  -1  -1  -5    0.46    0.54
   1   1  -5    0.96    0.66
  -1   1  -5    0.27    0.55
   1  -1  -5    0.00    0.50
   1  -1  -5   -0.16    0.31
   1   1   5   -0.49    0.36
   1  -1  -5    0.48    0.22
   1   1   5    0.29    0.42
   1  -1  -5   -0.18    0.33
  -1   1  -5    0.12    0.49
  -1   1  -5   -0.75    0.55
   1  -1  -5    0.56    0.58
  -1   2   5    6.43    0.95
  -1   2   5    5.26    0.63
  -1  -2  -5    4.61    0.89
   1   2  -5    5.37    0.83
   1  -2   5    4.73    0.99
   1   2  -5    6.38    0.98
  -1  -2  -5    5.87    0.74
  -1  -2  -5    6.00    0.86
   1   2  -5    4.69    0.91
  -1  -2  -5    4.71    0.63
  -1  -2   5    4.56    0.78
  -1   2  -5    4.61    0.85
   1  -2  -5    5.44    0.93
  -1   2  -5    6.13    0.94
   1  -2  -5    5.16    0.62
  -1   2  -5    5.91    0.68
   1   2   5    5.95    0.51
   1  -2  -5    4.28    0.57
   1   2   5    6.12    0.76
   1  -2  -5    4.28    0.59
   1  -3   5   -0.42    0.31
   1   3  -5   -0.37    0.32
  -1   3   5   -0.66    0.45
  -1   3   5    0.81    0.59
  -1  -3  -5    0.32    0.54
   1   3  -5   -0.40    0.65
  -1  -3  -5   -1.19    0.64
  -1  -3  -5    0.13    0.46
   1  -3   5   -0.79    0.76
  -1   3  -5    0.36    0.50
  -1   3  -5    0.13    0.60
   1   3   5   -0.75    0.53
   1  -3  -5    0.94    0.72
  -1   3  -5    0.03    0.28
   1  -3  -5   -0.20    0.40
   1  -3  -5    0.28    0.31
  -1  -3   5   -0.13    0.31
  -1  -3   5   -0.94    0.66
  -1  -4  -5    0.61    0.65
   1  -4   5    1.29    1.04
   1   4  -5   -0.17    0.38
   1   4  -5   -0.62    0.69
  -1   4   5   -0.07    0.50
  -1  -4  -5    0.69    0.63
  -1   4   5   -0.15    0.52
  -1  -4  -5   -0.84    0.66
  -1   4  -5    0.62    0.55
  -1   4  -5   -0.16    0.42
   1  -4  -5    0.04    0.55
  -1   4  -5    0.70    0.68
   1  -4  -5    0.30    0.69
  -1  -4   5   -0.23    0.63
   1   4   5   -0.19    0.56
   1  -4  -5   -0.26    0.37
   1   5  -5   -0.25    0.55
  -1  -5  -5    0.56    0.73
   1   5  -5    1.00    0.75
  -1   5   5    0.78    0.68
  -1  -5  -5    0.64    0.67
   1  -5   5    1.78    1.17
  -1  -5  -5    0.11    0.67
   1  -5  -5    0.90    0.70
   1   5   5   -0.58    0.72
   1  -5  -5    0.07    0.56
  -1   5  -5    1.36    0.62
  -1   5  -5   -0.64    0.60
   1   6  -5    1.53    0.79
  -1  -6  -5    1.92    0.90
  -1  -6  -5    0.36    0.72
   1   6  -5   -0.02    0.73
  -1   6   5    1.99    0.90
  -1   6  -5    1.12    0.69
   1  -6  -5    1.57    0.82
   1  -6  -5    2.39    0.94
   1   6   5    0.79    0.81
  -1   6  -5    0.99    0.74
   1   7  -5   -0.70    1.43
  -1  -7  -5    1.19    0.92
  -1  -7  -5    0.89    0.93
   1   7  -5   -0.20    0.77
  -1   7   5    1.75    1.00
   1   7   5   -0.62    1.10
  -1   7  -5    0.48    0.80
   1  -7  -5   -0.91    0.86
   1  -7  -5   -0.87    0.99
  -1  -8  -5   -1.29    1.12
  -1  -8  -5   -1.72    1.05
   1   8  -5    0.07    1.28
   1  -8  -5   -0.40    1.09
   1  -8  -5    1.87    1.17
  -1   8  -5   -0.93    1.12
   1   8   5    0.53    1.49
   1   0   6   71.47    3.53
   1   0  -6   75.21    3.41
   1   0  -6   72.65    3.51
   1   0  -6   71.21    2.79
  -1   0  -6   71.22    3.12
  -1   0  -6   71.12    3.42
  -1   0   6   69.44    3.86
   1   1  -6  349.11    9.35
   1  -1   6  344.43    9.76
  -1  -1  -6  351.90    8.94
  -1   1   6  345.80   10.17
  -1  -1  -6  340.74    9.46
  -1  -1  -6  351.21    8.47
   1   1  -6  345.67    8.74
   1   1  -6  344.00    9.55
   1  -1  -6  356.98    9.77
  -1   1  -6  349.15    9.52
   1  -1  -6  338.45    8.25
  -1   1  -6  348.31    9.56
   1  -1  -6  360.27    9.50
   1   1   6  345.21    8.22
  -1   1  -6  350.56    9.18
   1   2  -6   54.99    2.69
  -1   2   6   57.61    2.87
  -1  -2  -6   59.24    3.06
   1   2  -6   59.39    3.11
   1   2  -6   55.57    2.99
  -1  -2  -6   54.27    2.43
  -1  -2  -6   54.97    2.66
   1  -2   6   56.42    3.19
   1  -2  -6   57.60    2.25
  -1  -2   6   59.73    3.02
  -1   2  -6   57.02    2.91
   1   2   6   47.70    2.33
   1  -2  -6   54.66    2.96
   1  -2  -6   58.63    2.13
  -1   2  -6   52.95    2.83
   1   3  -6  248.17    7.62
  -1  -3  -6  249.85    6.91
  -1  -3  -6  237.81    6.79
  -1  -3  -6  245.44    7.56
   1   3  -6  239.38    7.19
   1  -3   6  243.42    7.94
  -1   3   6  242.98    6.94
   1   3   6  232.06    6.83
   1  -3  -6  252.45    7.62
   1  -3  -6  250.98    6.06
  -1   3  -6  239.90    7.39
  -1   3  -6  241.05    7.22
  -1  -3   6  238.05    7.47
   1  -3  -6  238.10    6.42
  -1  -4  -6   30.90    2.34
  -1  -4  -6   32.11    2.18
   1   4  -6   32.57    2.43
  -1   4   6   34.25    2.09
   1   4  -6   32.01    1.55
   1  -4   6   30.39    2.70
  -1  -4  -6   34.51    2.13
  -1  -4   6   31.40    2.38
  -1   4  -6   32.41    2.43
  -1   4  -6   33.45    1.60
   1  -4  -6   32.93    2.07
  -1   4  -6   32.67    2.24
   1  -4  -6   36.53    2.55
   1   5  -6  179.72    6.45
   1  -5   6  190.49    7.26
   1   5  -6  169.58    5.20
  -1  -5  -6  186.02    6.56
  -1  -5  -6  174.26    6.24
   1  -5  -6  183.09    6.68
   1  -5  -6  185.79    6.17
  -1   5  -6  179.65    5.25
  -1   5  -6  179.15    5.96
  -1  -6  -6   19.42    2.08
   1   6  -6   23.21    2.21
  -1  -6  -6   17.83    1.98
   1   6  -6   20.77    1.71
   1  -6  -6   22.21    2.07
  -1   6  -6   23.05    1.76
   1  -6  -6   20.55    2.21
  -1  -7  -6  113.13    5.29
   1   7  -6  124.34    4.84
  -1  -7  -6  119.78    5.63
   1  -7  -6  121.99    5.50
   1  -7  -6  111.63    5.45
  -1   7  -6  108.89    4.64
   1   8  -6   15.41    2.02
  -1  -8  -6   13.61    2.05
  -1  -8  -6   15.44    2.37
   1  -8  -6   13.29    2.23
   1  -8  -6   12.55    2.06
  -1   8  -6   15.36    1.99
   1   0  -7    1.74    0.88
  -1   0  -7   -0.05    0.65
   1   0   7   -0.51    0.71
  -1   0  -7   -1.03    0.72
  -1   0   7   -0.93    0.94
   1   0  -7   -0.24    0.51
   1   0  -7   -0.35    0.84
   1   0   7    0.27    0.76
   1   1  -7   -0.54    0.84
   1  -1   7    0.98    0.77
  -1  -1  -7    0.13    0.56
  -1  -1  -7    1.19    0.82
   1   1  -7    0.16    0.77
   1   1  -7    1.92    0.74
  -1   1   7   -0.83    0.87
  -1   1  -7    0.02    0.65
   1  -1  -7   -0.26    0.73
  -1   1  -7    1.00    0.77
   1  -1  -7    0.46    0.50
  -1   1  -7   -0.01    0.73
   1  -1  -7    0.21    0.74
  -1  -1   7   -0.51    0.66
  -1  -2  -7    2.76    0.72
  -1  -2  -7    2.62    0.80
   1   2  -7    1.71    0.74
   1   2  -7    2.81    1.05
   1   2  -7    3.40    1.07
  -1  -2  -7    1.22    0.84
  -1  -2   7    1.96    0.85
   1  -2  -7    3.10    0.64
  -1   2  -7    2.37    0.88
   1  -2  -7    3.27    0.97
  -1   2  -7    2.41    0.93
  -1  -3  -7    0.75    0.68
  -1  -3  -7   -0.48    0.80
   1  -3   7    0.17    0.88
   1   3  -7    1.44    0.89
  -1   3   7    0.38    0.60
   1   3  -7   -0.75    0.79
  -1  -3  -7   -0.60    0.63
   1  -3  -7    0.17    0.49
  -1   3  -7   -0.11    0.71
   1  -3  -7    0.42    0.81
  -1   3  -7    0.52    0.78
  -1  -3   7    1.37    0.93
   1  -4   7   -0.78    1.13
  -1  -4  -7   -0.39    0.78
   1   4  -7    0.58    0.93
  -1  -4  -7   -0.02    0.65
  -1  -4  -7   -0.28    0.81
   1  -4  -7   -0.90    0.82
   1  -4  -7   -0.31    0.63
  -1   4  -7   -0.06    0.75
  -1  -5  -7   -0.32    0.90
   1   5  -7   -1.06    0.99
  -1  -5  -7    0.69    0.81
   1  -5  -7    0.11    0.90
  -1   5  -7    1.11    0.99
   1  -5  -7    1.15    0.84
   1   6  -7    1.21    1.17
  -1  -6  -7   -0.06    0.86
  -1  -6  -7    0.22    0.98
   1  -6  -7    3.32    1.31
   1  -6  -7   -0.45    1.12
  -1  -7  -7   -1.35    2.26
  -1  -7  -7    0.55    1.07
   1  -7  -7    0.38    1.29
   1  -7  -7    1.74    1.21
  -1   0  -8   34.59    2.76
   1   0  -8   33.75    2.74
  -1   0  -8   32.76    2.32
   1   0   8   32.98    2.85
  -1   0   8   31.16    3.02
   1   0  -8   32.71    2.10
   1   0  -8   35.01    2.73
  -1  -1  -8  156.96    5.47
  -1  -1  -8  158.22    6.29
   1   1  -8  161.63    6.29
   1   1  -8  153.57    5.36
   1   1  -8  163.85    6.41
   1  -1   8  156.96    6.54
  -1   1   8  152.66    6.06
  -1   1  -8  163.43    6.46
   1  -1  -8  148.79    6.09
   1  -1  -8  155.41    5.03
   1   1   8  160.90    6.60
  -1   1  -8  147.61    5.59
  -1  -1   8  155.60    6.27
   1   2  -8   30.71    2.72
   1   2  -8   32.32    2.33
  -1  -2  -8   31.36    2.59
   1  -2   8   29.44    2.79
   1   2  -8   32.92    2.80
  -1  -2  -8   29.14    2.14
   1  -2  -8   29.46    2.60
  -1   2  -8   32.95    2.64
  -1   2  -8   33.45    2.46
  -1  -2   8   36.60    2.87
  -1  -3  -8  150.89    6.25
   1   3  -8  146.78    6.16
   1  -3   8  149.72    6.63
  -1  -3  -8  142.08    5.07
  -1  -3  -8  145.68    5.00
  -1   3  -8  144.47    5.83
  -1  -3   8  151.05    6.37
  -1   3  -8  142.91    5.89
   1  -3  -8  149.33    6.25
   1   4  -8   33.13    2.77
  -1  -4  -8   29.78    2.31
   1  -4   8   27.45    2.97
  -1  -4  -8   32.92    2.81
   1  -4  -8   31.26    2.09
  -1   4  -8   31.16    2.72
   1  -4  -8   27.64    2.66
  -1   4  -8   26.78    2.46
   1   5  -8  102.73    5.09
  -1  -5  -8   94.99    4.50
  -1  -5  -8   93.14    4.99
   1  -5  -8   93.95    5.12
  -1   5  -8   96.88    4.65
   1  -5  -8   98.27    4.27
  -1  -6  -8   19.38    2.45
  -1  -6  -8   19.33    2.33
   1   6  -8   17.73    2.35
   1  -6  -8   17.19    2.40
   1  -6  -8   24.37    2.39
   1   0   9    0.18    0.95
  -1   0  -9    1.21    1.13
   1   0  -9   -0.51    1.18
  -1   0  -9    0.98    0.92
   1   0  -9    1.02    0.83
  -1   0   9    1.53    1.10
   1   0  -9   -0.04    0.94
   1   1  -9   -0.78    0.79
   1   1  -9   -0.63    1.33
  -1  -1  -9   -1.17    0.89
   1  -1   9   -1.80    1.27
   1   1  -9    1.19    1.19
  -1  -1  -9    0.69    1.11
  -1   1  -9    0.34    1.11
   1  -1  -9   -0.83    1.08
   1   1   9    1.13    1.04
  -1  -1   9   -0.20    1.05
  -1   1  -9    2.15    1.32
   1  -2   9   -1.47    1.35
   1   2  -9    1.94    1.16
  -1  -2  -9    0.35    0.93
   1   2  -9   -1.23    1.15
   1   2   9    1.79    1.15
   1  -2  -9    0.96    1.04
  -1  -2   9    0.38    1.08
  -1   2  -9    1.78    1.02
   1   3  -9   -0.24    1.14
  -1  -3  -9    0.72    1.11
   1  -3   9   -0.81    1.34
   1  -3  -9    0.57    1.15
  -1   3  -9    0.22    1.07
  -1   3  -9   -0.73    0.99
  -1  -4  -9    0.91    1.11
   1   4  -9   -0.19    1.27
  -1   4  -9    2.17    1.30
   1  -4  -9   -0.57    1.23
  -1   4  -9    2.20    1.27
   1   5  -9    2.18    1.61
  -1  -5  -9   -2.19    1.40
   1  -5  -9   -0.54    1.37
   1   0 -10   19.09    2.47
  -1   0  10   18.28    2.51
  -1   0 -10   15.44    2.40
   1   0  10   18.79    2.63
  -1   0 -10   20.76    2.21
  -1  -1 -10   92.33    5.31
   1  -1  10   90.07    5.65
   1   1 -10   86.41    4.24
   1   1 -10   92.43    5.37
   1   1 -10   95.02    5.38
  -1   1  10   85.78    5.24
  -1  -1  10   87.26    5.27
   1   1  10   86.27    5.45
  -1   1 -10   97.06    4.75
   1  -1 -10   90.72    5.24
   1  -2  10   12.56    2.36
  -1  -2 -10   15.91    2.32
   1   2 -10   16.70    2.42
   1  -2 -10   14.40    2.17
  -1   2 -10   11.58    1.99
   1   2  10   17.66    2.61
  -1  -3 -10   76.98    4.88
   1   3 -10   71.09    4.70
   1  -3 -10   65.21    4.53
   1   3  10   69.52    4.98
  -1   3 -10   71.95    4.32
   1   4 -10   10.73    2.28
  -1  -4 -10    6.55    1.83
   1  -4 -10    9.40    2.10
  -1   4 -10   12.15    2.22
   1   4  10   10.51    2.28
   1   0 -11   -2.11    1.87
   1   0  11    1.20    1.64
  -1   0 -11   -3.46    2.30
  -1   0  11    2.83    1.69
   2   0   0  452.67   10.63
   2   0   0  445.95   10.57
  -2   0   0  466.79    9.71
  -2   0   0  433.65   10.51
  -2   0   0  473.52   10.28
  -2   0   0  446.03   10.55
   2   0   0  467.33    9.68
   2   0   0  457.54   10.28
  -2  -1   0  451.40    9.64
  -2   1   0  441.89    9.52
  -2   1   0  423.79    9.55
   2  -1   0  434.80    9.52
   2  -1   0  435.16    9.56
  -2   1   0  422.46    9.53
  -2  -1   0  443.70    9.05
   2   1   0  429.25    8.98
   2  -1   0  426.18    9.03
   2   1   0  439.67    9.61
  -2  -1   0  424.57    9.60
   2  -1   0  441.14    9.52
   2   1   0  443.67    8.88
  -2   1   0  426.84    9.50
  -2   1   0  450.02    9.06
   2   1   0  430.09    9.56
   2  -1   0  433.09    9.58
   2   2   0  411.38    9.20
   2  -2   0  414.45    9.27
  -2   2   0  405.07    9.29
   2   2   0  406.99    8.41
  -2   2   0  425.28    8.63
  -2  -2   0  399.61    8.18
  -2  -2   0  416.29    9.27
  -2   2   0  400.23    9.20
   2  -2   0  407.10    9.23
   2  -2   0  403.56    8.57
  -2   3   0  374.46    9.02
  -2   3   0  370.21    9.15
   2  -3   0  388.08    9.12
   2  -3   0  400.85    9.18
  -2  -3   0  384.63    7.96
  -2  -3   0  376.92    9.08
   2   3   0  403.12    9.24
   2   3   0  369.55    8.62
  -2   3   0  392.50    8.47
   2  -4   0  300.04    7.89
  -2   4   0  297.40    7.81
   2  -4   0  307.02    7.81
   2   4   0  304.53    7.96
   2   4   0  280.85    7.89
  -2  -4   0  301.56    6.59
  -2  -4   0  309.48    7.99
  -2  -5   0  238.92    6.97
   2   5   0  231.99    6.94
  -2  -5   0  228.42    5.45
   2  -5   0  221.65    6.83
  -2   5   0  219.46    6.80
   2  -5   0  229.40    6.58
  -2  -6   0  170.20    4.45
   2   6   0  164.83    5.98
   2  -6   0  165.87    5.50
   2  -6   0  161.62    5.92
  -2  -6   0  163.61    5.94
  -2   6   0  161.64    5.86
   2   7   0  109.25    5.06
  -2  -7   0  110.73    5.10
   2  -7   0  115.58    5.11
  -2   7   0  114.49    5.05
   2  -7   0  111.16    4.53
   2  -8   0   75.42    4.39
  -2  -8   0   75.24    4.36
  -2   8   0   69.84    4.20
   2  -8   0   68.04    4.20
   2   8   0   73.21    4.33
  -2   9   0   49.08    3.86
   2   9   0   56.28    4.10
   2  -9   0   50.10    3.95
  -2  -9   0   51.43    3.92
  -2   0  -1   -0.86    0.65
   2   0   1    0.20    0.65
   2   0   1   -0.70    0.72
  -2   0  -1    0.35    0.23
  -2   0  -1   -0.12    0.36
  -2   0  -1    0.55    0.47
  -2   0   1   -0.80    0.55
  -2   0  -1   -0.67    0.69
   2   0   1    0.42    0.33
   2   0  -1    0.25    0.28
   2   0   1   -0.09    0.37
  -2   0   1   -0.37    0.29
   2   0  -1    0.25    0.52
   2   0  -1   -0.51    0.36
  -2   0   1   -0.93    0.66
   2   0  -1    1.20    0.66
  -2   1   1    5.51    0.45
   2  -1   1    4.33    0.63
   2   1  -1    4.72    0.31
   2   1  -1    5.12    0.60
  -2  -1  -1    5.23    0.47
  -2   1   1    5.65    0.62
  -2  -1  -1    4.53    0.64
   2   1  -1    4.69    0.65
   2  -1   1    5.11    0.53
   2  -1   1    6.16    0.59
  -2   1   1    4.96    0.58
  -2  -1  -1    5.54    0.67
   2  -1   1    5.44    0.38
  -2   1   1    3.63    0.74
   2  -1   1    5.09    0.71
   2   1  -1    4.78    0.27
   2  -1  -1    5.08    0.45
   2   1   1    5.66    0.68
  -2  -1   1    5.61    0.37
   2  -1  -1    5.84    0.63
   2  -1  -1    4.89    0.72
  -2  -1   1    5.09    0.61
  -2  -1   1    4.55    0.65
  -2   1  -1    5.59    0.66
   2   1   1    5.23    0.54
  -2   1  -1    5.81    0.62
   2  -1  -1    4.60    0.59
   2  -1  -1    5.53    0.61
  -2   1  -1    5.46    0.57
  -2   1  -1    5.17    0.64
   2   1   1    5.12    0.49
  -2   1  -1    5.77    0.71
  -2   2   1   -0.55    0.57
   2   2  -1   -0.38    0.38
   2  -2   1    0.55    0.41
   2  -2   1   -0.46    0.73
   2   2  -1   -0.30    0.30
  -2  -2  -1   -0.46    0.41
  -2  -2  -1    0.43    0.24
  -2   2   1    0.58    0.43
   2   2   1    0.35    0.25
  -2   2  -1    0.14    0.34
   2  -2  -1    0.33    0.47
   2   2   1    0.45    0.42
  -2   2  -1    0.29    0.37
  -2  -2   1    0.35    0.37
   2  -2  -1   -0.08    0.35
   2  -3   1    1.84    0.55
  -2  -3  -1    1.33    0.32
  -2   3   1    1.43    0.27
   2  -3   1    0.50    0.54
  -2  -3  -1    0.88    0.49
  -2   3   1    0.68    0.65
  -2   3   1    0.96    0.47
  -2   3  -1    0.67    0.42
  -2   3  -1    1.02    0.45
   2  -3  -1    1.04    0.26
   2   3   1    1.30    0.53
   2  -3  -1    0.69    0.51
  -2  -3   1    1.20    0.47
  -2  -4  -1    2.11    0.40
  -2   4   1    1.84    0.35
  -2  -4  -1    2.39    0.71
   2  -4  -1    2.00    0.61
   2  -4  -1    2.77    0.66
  -2  -4   1    1.29    0.53
   2   4   1    2.29    0.69
  -2   4  -1    1.82    0.60
  -2  -5  -1    0.65    0.36
   2  -5   1    1.08    0.56
  -2   5   1    0.47    0.57
   2   5  -1    0.42    0.54
  -2  -5  -1   -0.19    0.54
   2   5   1    2.21    0.73
   2  -5  -1    0.84    0.58
   2  -5  -1    0.87    0.60
  -2  -5   1    1.13    0.30
  -2   5  -1    0.80    0.30
  -2   5  -1    0.24    0.60
  -2  -5   1    1.10    0.56
   2   6  -1    0.53    0.63
  -2  -6  -1    0.13    0.39
  -2  -6  -1   -0.71    0.66
   2  -6   1   -0.39    0.62
  -2   6   1    0.06    0.62
   2  -6   1    0.39    0.56
  -2  -6   1    0.07    0.30
   2   6   1   -0.98    0.73
   2  -6  -1    1.18    0.71
   2  -6  -1   -0.59    0.64
  -2   6  -1   -0.77    0.66
  -2  -6   1    0.26    0.57
  -2   7   1    1.93    0.93
  -2  -7  -1    0.69    0.83
   2  -7   1    0.93    0.78
   2   7  -1    0.66    0.83
   2  -7   1    0.20    0.64
  -2   7  -1   -1.45    0.83
   2  -7  -1    0.21    0.70
  -2  -7   1    0.42    0.80
   2   7   1    0.93    0.90
   2  -8   1    0.85    0.94
  -2  -8  -1    0.94    0.90
  -2   8   1   -2.28    1.18
   2  -8   1    0.33    0.91
   2   8  -1    0.15    0.93
   2  -8  -1   -0.05    0.76
   2  -8  -1    1.37    1.04
  -2   8  -1    0.35    0.86
   2   8   1    0.27    0.81
  -2  -8   1    3.06    1.22
   2  -8  -1    1.38    1.16
   2  -9   1   -2.12    1.40
  -2  -9  -1   -0.63    1.19
   2   9  -1    0.56    1.15
  -2   9   1    0.49    1.20
  -2   9  -1    3.64    1.49
  -2  -9   1    1.14    1.70
   2  -9  -1    1.60    1.10
   2   9   1    1.78    1.33
   2  -9  -1    1.09    1.31
  -2   0  -2  435.36   10.37
   2   0   2  420.71   10.42
   2   0  -2  430.41    9.58
   2   0   2  429.57    8.86
   2   0  -2  439.71    9.45
  -2   0  -2  428.79    9.79
   2   0  -2  429.83    9.89
  -2   0   2  427.79    9.37
  -2   0  -2  438.71    9.97
  -2   0   2  413.03    9.84
  -2   0  -2  453.29    9.71
   2   0  -2  425.35    9.20
   2   0   2  440.02    9.80
  -2   0   2  438.66    8.93
  -2   0   2  409.24    9.16
   2   1  -2  550.55   12.22
  -2  -1  -2  547.89   12.06
   2  -1   2  555.96   12.65
  -2  -1  -2  574.88   12.25
   2  -1   2  561.05   11.92
  -2  -1  -2  567.45   12.41
  -2   1   2  578.74   13.49
  -2   1   2  566.06   12.23
   2   1  -2  577.33   12.49
   2  -1   2  561.22   11.84
   2   1  -2  578.53   11.68
   2   1  -2  559.28   11.88
  -2   1   2  590.20   12.02
   2  -1   2  542.52   12.22
   2   1   2  599.54   12.49
   2   1   2  560.17   12.30
  -2  -1   2  582.36   12.33
   2  -1  -2  567.92   12.14
   2  -1  -2  559.02   12.20
   2  -1  -2  599.15   12.05
   2  -1  -2  545.26   12.08
  -2  -1   2  573.39   11.64
  -2   1  -2  557.32   12.27
   2  -1  -2  574.25   12.09
  -2  -1   2  592.43   11.60
  -2   1  -2  559.68   12.62
  -2   1  -2  561.75   12.31
  -2  -2  -2  318.13    7.68
   2  -2   2  336.68    8.20
  -2   2   2  313.69    7.18
   2  -2   2  341.10    7.53
   2   2  -2  309.65    7.34
   2   2  -2  298.07    7.16
  -2  -2  -2  323.97    7.39
  -2   2   2  320.62    8.09
  -2  -2  -2  334.93    7.40
  -2   2   2  311.05    7.43
   2  -2   2  291.09    6.99
  -2   2  -2  312.18    7.58
   2  -2  -2  301.46    7.42
  -2   2  -2  323.59    7.61
  -2  -2   2  320.60    7.36
   2  -2  -2  323.35    7.33
   2   2   2  326.58    7.76
  -2   2  -2  323.93    6.94
   2  -2  -2  323.77    7.71
  -2  -2   2  331.81    6.71
   2  -2  -2  320.36    7.50
  -2   2  -2  323.52    7.46
  -2  -3  -2  348.91    8.62
  -2   3   2  357.32    8.90
   2  -3   2  349.61    8.37
   2   3  -2  333.96    8.26
   2  -3   2  362.61    9.07
  -2   3   2  364.07    8.59
  -2  -3  -2  343.53    8.00
   2  -3  -2  350.88    8.51
  -2  -3   2  339.78    8.27
   2  -3  -2  354.09    8.66
  -2   3  -2  343.50    8.40
  -2   3  -2  329.98    8.23
   2   3   2  357.91    8.72
  -2   3  -2  344.56    7.50
  -2  -3   2  347.70    7.50
  -2  -4  -2  177.88    5.56
   2  -4   2  176.52    5.53
  -2   4   2  185.47    5.56
   2   4  -2  178.39    5.30
   2  -4   2  179.54    5.36
  -2  -4  -2  182.76    4.88
  -2   4   2  175.29    5.54
   2  -4  -2  171.29    4.68
   2  -4  -2  184.31    5.56
  -2   4  -2  178.45    4.31
  -2  -4   2  173.38    4.16
  -2   4  -2  178.11    5.31
  -2  -4   2  174.01    5.23
   2   4   2  184.44    5.64
  -2   4  -2  188.14    5.34
   2  -5   2  210.42    6.47
   2   5  -2  216.72    6.51
   2  -5   2  213.18    6.38
  -2   5   2  216.83    6.69
  -2  -5  -2  210.36    6.75
  -2  -5  -2  211.76    5.71
   2   5   2  205.33    6.71
  -2   5  -2  225.14    6.59
   2  -5  -2  214.12    6.65
  -2   5  -2  213.07    5.17
  -2  -5   2  212.64    6.47
  -2  -6  -2  100.17    3.57
   2   6  -2  106.24    4.43
   2  -6   2   99.59    4.35
   2  -6   2  102.79    4.10
  -2  -6  -2  110.16    4.76
  -2   6   2  103.44    4.62
  -2  -6   2  103.66    4.42
   2   6   2  109.31    4.73
   2  -6  -2  105.84    4.64
  -2   6  -2  105.40    4.41
   2  -6  -2  108.22    4.33
  -2   7   2  130.00    5.60
   2  -7   2  125.28    5.38
  -2  -7  -2  129.65    5.63
   2   7  -2  131.56    5.43
   2  -7   2  132.01    4.89
  -2  -7  -2  124.54    4.32
   2   7   2  122.76    5.51
  -2   7  -2  125.43    5.32
   2  -7  -2  126.80    5.10
   2  -7  -2  128.18    5.58
  -2  -7   2  127.67    5.34
   2   8  -2   73.31    4.22
   2  -8   2   72.25    4.21
  -2   8   2   70.18    4.33
   2   8  -2   69.66    3.90
  -2  -8  -2   65.27    4.21
   2  -8   2   62.25    4.01
  -2   8  -2   72.17    4.19
   2  -8  -2   70.47    3.88
  -2  -8   2   69.98    4.14
   2   8   2   64.86    4.23
   2  -8  -2   68.11    4.24
  -2  -9  -2   62.47    4.45
   2   9  -2   64.85    4.38
  -2   9   2   60.85    4.43
   2  -9  -2   65.95    4.59
   2   9   2   68.39    4.61
  -2   9  -2   60.96    4.15
   2  -9  -2   58.32    3.79
  -2   0  -3    0.00    0.40
   2   0   3   -0.38    0.50
  -2   0   3    0.27    0.30
  -2   0  -3    0.60    0.57
   2   0  -3    0.51    0.25
  -2   0  -3    1.16    0.60
  -2   0  -3    0.63    0.67
   2   0  -3   -0.35    0.39
  -2   0   3    0.47    0.25
   2   0  -3   -0.09    0.43
   2   0   3    0.87    0.66
   2   0  -3   -0.47    0.45
  -2  -1  -3    2.18    0.46
  -2  -1  -3    2.32    0.66
   2   1  -3    2.07    0.57
   2  -1   3    1.29    0.47
   2   1  -3    2.53    0.49
   2   1  -3    3.33    0.71
  -2   1   3    2.49    0.33
  -2  -1  -3    1.31    0.44
   2  -1   3    2.88    0.44
  -2   1   3    2.50    0.40
  -2  -1  -3    2.72    0.57
  -2   1   3    3.30    1.18
   2  -1   3    1.58    0.70
   2  -1  -3    2.31    0.60
  -2   1  -3    2.39    0.53
   2  -1  -3    2.07    0.44
   2  -1  -3    2.36    0.59
  -2   1  -3    1.46    0.57
   2  -1  -3    2.58    0.41
  -2   1  -3    1.47    0.68
  -2  -1   3    1.69    0.53
   2   1   3    2.65    0.62
   2  -1  -3    1.92    0.25
   2   1   3    1.53    0.52
  -2  -2  -3   -0.34    0.40
   2   2  -3    0.87    0.42
   2   2  -3   -0.17    0.25
   2   2  -3   -0.13    0.25
  -2  -2  -3   -0.11    0.37
   2  -2   3   -0.43    0.36
   2  -2   3    0.06    0.59
   2   2  -3   -0.08    0.45
  -2   2   3   -0.08    0.30
  -2   2   3   -0.71    0.67
   2   2  -3   -0.37    0.36
  -2   2  -3    0.07    0.29
  -2  -2   3   -0.29    0.28
  -2  -2   3    0.08    0.35
   2  -2  -3   -0.40    0.37
  -2  -2   3   -0.70    0.33
   2  -2  -3   -0.36    0.36
   2  -2  -3    0.24    0.52
   2   2   3    0.27    0.38
  -2   2  -3    0.57    0.43
  -2   2  -3   -0.47    0.46
   2  -2  -3   -0.85    0.51
  -2   2  -3    0.11    0.30
  -2  -3  -3    1.55    0.56
   2   3  -3    1.23    0.46
   2   3  -3   -0.08    0.31
   2  -3   3    0.87    0.87
  -2  -3  -3    1.04    0.35
  -2  -3  -3    0.56    0.45
   2  -3   3    0.12    0.33
  -2   3   3    0.47    0.41
   2   3  -3    0.11    0.52
   2  -3  -3    0.88    0.61
  -2  -3   3    0.46    0.37
  -2   3  -3    0.49    0.32
   2   3   3    0.98    0.50
  -2   3  -3    0.25    0.32
   2  -3  -3    0.79    0.50
  -2  -3   3    0.40    0.29
  -2   3  -3    0.82    0.51
   2  -4   3    1.13    0.92
   2   4  -3    0.28    0.60
  -2   4   3    1.17    0.68
  -2  -4  -3    2.01    0.70
   2  -4   3    1.39    0.57
   2   4  -3    1.51    0.57
  -2   4  -3    0.95    0.57
  -2  -4   3    0.26    0.44
   2  -4  -3   -0.57    0.64
  -2   4  -3    2.06    0.62
   2  -4  -3    0.71    0.30
   2  -4  -3    1.38    0.58
  -2   4  -3    1.26    0.40
   2   5  -3    0.72    0.65
   2   5  -3    0.79    0.61
  -2  -5  -3    0.29    0.42
   2  -5   3    0.37    0.57
  -2   5   3    0.94    0.63
   2  -5   3    0.32    0.73
  -2  -5   3    0.64    0.56
   2  -5  -3    1.82    0.72
  -2   5  -3    0.52    0.58
  -2   5  -3    1.22    0.74
   2   5   3    0.74    0.69
  -2   5  -3    1.39    0.43
   2  -5  -3   -0.29    0.68
   2   6  -3    0.19    0.79
  -2   6   3    0.58    0.73
  -2  -6  -3    0.44    0.54
  -2  -6  -3   -0.32    0.67
   2  -6   3    0.13    0.54
   2  -6   3    0.28    0.64
   2   6  -3    0.01    0.58
  -2   6  -3   -0.40    0.58
   2  -6  -3   -0.40    0.69
  -2  -6   3    0.57    0.64
   2   6   3    2.11    0.89
   2  -6  -3    2.84    0.97
  -2   7   3   -0.49    0.88
  -2  -7  -3    1.13    0.66
   2   7  -3   -1.37    0.92
   2  -7   3   -0.24    0.69
   2   7  -3   -0.10    0.94
   2  -7   3    0.01    0.68
  -2  -7  -3   -2.02    1.01
  -2  -7   3   -0.77    0.80
   2   7   3   -0.27    0.81
  -2   7  -3    0.21    0.73
   2  -7  -3   -2.14    0.97
   2  -7  -3   -0.49    0.86
   2  -7  -3    1.30    0.91
   2   8  -3    0.51    0.91
  -2  -8  -3   -0.02    0.88
  -2   8  -3    0.33    0.98
   2  -8  -3   -0.14    0.97
   2   8   3   -1.04    1.03
   2  -8  -3    0.56    1.08
  -2   9   3   -2.34    1.49
  -2  -9  -3    0.17    1.08
   2   9  -3    1.52    1.28
  -2   9  -3    0.57    1.10
   2  -9  -3    1.62    1.33
   2  -9  -3   -0.48    1.79
   2   9   3   -0.08    1.37
   2   0  -4  255.17    5.50
   2   0  -4  257.39    7.00
  -2   0  -4  257.24    6.95
   2   0  -4  254.63    6.03
   2   0  -4  252.00    6.60
  -2   0  -4  268.31    7.02
   2   0   4  263.78    7.19
  -2   0  -4  262.51    7.02
  -2   0  -4  255.09    6.14
   2   0   4  269.39    7.22
  -2   0   4  260.23    5.53
  -2  -1  -4  277.04    7.34
   2   1  -4  288.88    7.55
   2  -1   4  272.30    6.52
  -2  -1  -4  260.15    6.53
  -2  -1  -4  274.35    7.19
  -2   1   4  274.64    6.23
  -2  -1  -4  274.71    7.12
   2  -1   4  272.04    7.67
   2   1  -4  278.82    6.97
  -2   1   4  263.86    6.45
  -2   1   4  272.36    8.78
   2  -1  -4  285.97    7.21
   2  -1  -4  282.82    6.15
   2  -1  -4  278.45    6.24
   2  -1  -4  286.63    7.44
   2   1   4  286.14    7.56
   2   1   4  284.74    7.26
  -2   1  -4  277.19    7.07
  -2   1  -4  270.88    6.50
  -2   1  -4  270.96    7.01
  -2   1  -4  286.87    7.39
   2  -1  -4  273.49    6.51
  -2  -2  -4  243.49    6.48
   2  -2   4  241.21    7.22
   2   2  -4  246.24    6.35
  -2   2   4  235.45    7.21
   2   2  -4  255.30    7.01
  -2  -2  -4  243.24    6.80
  -2   2   4  242.46    6.03
   2   2  -4  246.14    5.94
   2  -2   4  250.17    5.91
  -2  -2  -4  244.06    6.60
  -2  -2  -4  226.36    6.16
  -2   2  -4  242.50    6.77
  -2  -2   4  242.49    6.12
   2  -2  -4  222.06    5.98
   2  -2  -4  245.16    6.82
  -2   2  -4  255.36    6.42
  -2   2  -4  246.23    5.89
   2   2   4  247.10    6.51
   2  -2  -4  244.68    6.77
  -2  -2   4  249.55    5.97
  -2   2  -4  245.78    6.52
   2  -2  -4  241.36    6.02
   2   3  -4  246.69    6.11
  -2   3   4  234.09    7.05
  -2  -3  -4  240.47    6.64
   2   3  -4  224.01    6.43
  -2  -3  -4  236.70    6.68
  -2   3   4  247.52    6.43
   2   3  -4  244.54    7.04
   2  -3   4  243.48    6.14
  -2  -3  -4  232.05    6.69
   2  -3   4  250.45    7.70
  -2   3  -4  248.73    6.18
   2   3   4  246.01    6.82
   2  -3  -4  250.15    6.98
  -2  -3   4  240.21    6.08
  -2  -3   4  238.13    6.06
  -2   3  -4  250.14    6.34
  -2   3  -4  241.20    6.89
  -2   3  -4  216.29    6.32
   2  -3  -4  244.26    6.39
   2  -4   4  207.62    7.01
   2   4  -4  192.39    6.21
   2  -4   4  196.55    5.61
  -2  -4  -4  198.39    5.89
   2   4  -4  194.03    5.49
  -2   4   4  193.58    5.88
  -2   4   4  188.29    6.16
  -2  -4  -4  202.15    6.21
   2  -4  -4  194.94    6.18
   2  -4  -4  190.03    5.82
  -2  -4   4  192.58    5.47
   2   4   4  192.71    6.17
  -2   4  -4  195.49    5.34
  -2   4  -4  191.98    5.55
  -2   4  -4  194.81    6.21
   2  -5   4  165.15    5.26
  -2  -5  -4  156.84    5.72
   2   5  -4  160.52    5.13
   2   5  -4  159.71    5.70
  -2   5   4  157.21    5.63
  -2  -5  -4  161.79    5.26
  -2   5   4  158.73    5.58
   2  -5   4  163.08    6.03
   2   5   4  153.96    5.69
  -2   5  -4  156.11    4.62
   2  -5  -4  156.72    5.62
  -2  -5   4  158.86    5.12
  -2   5  -4  156.23    5.16
   2  -5  -4  153.72    5.51
  -2   5  -4  156.62    5.65
  -2  -6  -4  128.51    5.31
   2   6  -4  116.33    4.69
  -2  -6  -4  123.35    4.60
   2   6  -4  115.05    4.92
  -2   6   4  113.93    4.95
   2  -6   4  121.47    4.95
   2  -6  -4  125.64    5.17
   2  -6  -4  126.72    5.13
   2   6   4  122.90    5.23
  -2   6  -4  126.43    4.78
   2  -6  -4  117.28    4.97
  -2   7   4   84.61    4.53
  -2  -7  -4   80.80    3.76
   2   7  -4   87.05    4.30
  -2  -7  -4   84.11    4.58
   2   7  -4   84.84    4.18
   2  -7  -4   85.79    4.46
  -2   7  -4   89.11    4.20
   2   7   4   84.22    4.59
   2  -7  -4   85.14    4.36
  -2  -8  -4   55.63    3.98
   2   8  -4   51.65    3.46
  -2   8   4   50.90    3.81
   2  -8  -4   55.94    3.93
  -2   8  -4   58.36    3.66
   2   8   4   49.37    3.85
   2  -8  -4   49.54    3.49
  -2   9   4   41.34    3.80
   2   9  -4   44.77    3.51
  -2  -9  -4   44.77    3.83
   2   9   4   39.44    3.66
  -2   9  -4   43.21    3.54
   2  -9  -4   37.02    3.27
   2  -9  -4   42.95    3.75
  -2   0  -5    0.15    0.47
  -2   0  -5    0.53    0.58
   2   0  -5   -0.05    0.33
   2   0  -5    0.19    0.52
  -2   0  -5   -0.35    0.29
   2   0   5   -0.20    0.47
   2   0  -5   -0.48    0.50
   2   0   5    0.25    0.58
  -2   0   5    0.12    0.80
  -2   0  -5    0.36    0.53
  -2  -1  -5    0.89    0.43
   2  -1   5    1.33    0.76
  -2   1   5   -0.87    1.02
   2  -1   5    0.36    0.30
   2   1  -5    0.91    0.68
  -2  -1  -5    0.68    0.55
   2   1  -5   -0.56    0.59
  -2  -1  -5    0.75    0.60
  -2  -1  -5    2.00    0.67
   2   1  -5    0.39    0.42
  -2   1   5    0.29    0.24
  -2   1  -5    1.41    0.62
   2   1   5    0.30    0.55
  -2   1  -5    0.15    0.27
   2   1   5   -0.38    0.59
   2  -1  -5    1.63    0.69
   2  -1  -5    0.67    0.29
   2  -1  -5    0.42    0.25
   2  -1  -5    0.52    0.59
  -2   2   5    0.58    0.77
   2  -2   5    1.74    0.89
  -2  -2  -5   -0.28    0.53
  -2  -2  -5   -0.56    0.61
   2   2  -5    0.50    0.68
  -2   2   5   -0.10    0.33
  -2  -2  -5    0.51    0.61
   2   2  -5    0.94    0.65
   2   2   5    0.66    0.49
  -2   2  -5   -0.03    0.26
  -2   2  -5   -0.17    0.50
   2  -2  -5    0.59    0.44
  -2  -2   5   -0.12    0.43
   2  -2  -5    0.21    0.61
   2  -2  -5    0.49    0.59
   2  -2  -5    0.29    0.25
  -2   2  -5    1.92    0.75
  -2   2  -5    0.05    0.56
   2   3  -5    1.13    0.46
  -2  -3  -5    0.34    0.57
   2  -3   5    1.20    0.97
  -2   3   5    0.13    0.66
   2  -3   5    0.38    0.38
   2   3  -5    0.75    0.66
  -2  -3  -5    0.37    0.66
  -2   3   5    0.45    0.43
  -2  -3  -5    0.04    0.52
  -2   3  -5   -0.29    0.63
  -2  -3   5   -0.20    0.50
   2   3   5    0.12    0.53
  -2   3  -5    0.92    0.54
  -2   3  -5    0.92    0.40
   2  -3  -5    0.81    0.49
   2  -3  -5    0.93    0.65
   2   4  -5   -0.28    0.46
  -2   4   5    0.38    0.53
   2   4  -5   -1.44    0.85
   2  -4   5    0.48    1.08
  -2  -4  -5    0.92    0.67
  -2   4   5    0.00    0.70
  -2  -4  -5   -0.54    0.63
  -2  -4  -5   -0.20    0.75
  -2   4  -5    0.29    0.43
   2   4   5    1.90    0.78
   2  -4  -5    1.11    0.77
  -2  -4   5    0.17    1.14
   2  -4  -5    0.63    0.61
  -2   4  -5    2.19    0.93
  -2   4  -5    0.19    0.55
   2  -5   5   -0.60    1.20
  -2  -5  -5   -1.15    0.68
  -2  -5  -5   -1.95    0.91
   2   5  -5    0.24    0.58
   2   5  -5   -1.89    0.99
  -2   5   5   -0.11    0.62
  -2   5   5    0.62    0.70
   2  -5  -5    1.91    0.86
  -2   5  -5   -0.84    0.75
  -2   5  -5    1.27    0.59
   2   5   5    0.28    0.69
   2  -5  -5    1.36    0.79
  -2   5  -5    0.27    0.55
   2   6  -5   -0.32    0.69
  -2  -6  -5    0.68    0.77
   2  -6   5    1.57    1.11
  -2   6   5   -1.14    0.89
   2   6  -5    0.59    0.95
  -2  -6  -5   -0.38    0.85
   2   6   5   -1.04    0.89
  -2   6  -5    0.46    0.77
   2  -6  -5   -0.52    0.83
   2  -6  -5    1.49    0.99
   2   7  -5   -0.08    1.22
  -2  -7  -5    0.11    0.92
  -2   7   5    0.93    1.04
   2   7  -5    0.39    0.82
  -2  -7  -5   -0.88    0.84
   2  -7  -5    1.31    1.07
  -2   7  -5    0.61    0.97
   2  -7  -5   -2.27    1.16
   2   7   5    1.45    1.09
   2   8  -5   -0.82    1.53
  -2  -8  -5    1.75    1.24
   2  -8  -5    0.36    1.16
   2   8   5    1.44    1.19
   2  -8  -5    0.37    1.17
  -2   8  -5    0.87    1.31
   2   0  -6  162.58    5.85
   2   0  -6  166.64    4.80
  -2   0  -6  171.64    5.60
   2   0  -6  169.84    5.66
   2   0   6  168.62    6.05
  -2   0  -6  172.32    4.48
  -2   0  -6  171.04    5.90
  -2   0   6  171.48    6.85
  -2  -1  -6  211.87    6.80
   2   1  -6  215.86    6.94
  -2   1   6  227.10    8.32
   2   1  -6  221.81    6.07
   2   1  -6  223.80    6.70
  -2  -1  -6  216.84    6.44
  -2  -1  -6  210.60    6.44
   2  -1   6  206.40    7.08
   2  -1  -6  213.17    7.00
  -2   1  -6  215.51    6.70
  -2   1  -6  213.73    6.92
   2  -1  -6  213.44    6.63
   2  -1  -6  223.82    5.57
   2   1   6  215.46    7.12
   2  -2   6  143.43    5.66
  -2  -2  -6  140.93    5.18
  -2  -2  -6  136.00    4.71
  -2   2   6  138.38    5.53
   2   2  -6  137.27    5.03
   2   2  -6  137.87    5.32
  -2  -2  -6  148.03    5.03
  -2   2  -6  140.04    3.46
   2  -2  -6  139.18    3.75
   2  -2  -6  133.54    5.10
   2   2   6  140.84    4.86
   2  -2  -6  139.54    3.95
   2  -2  -6  140.20    5.44
  -2  -2   6  144.24    4.95
  -2   2  -6  142.54    5.16
  -2   2  -6  141.52    4.99
  -2  -3  -6  162.79    5.78
  -2  -3  -6  160.96    5.56
  -2   3   6  165.78    5.87
   2  -3   6  162.82    6.42
  -2  -3  -6  157.52    5.40
   2   3  -6  162.19    5.95
  -2   3  -6  168.47    5.94
  -2   3  -6  160.40    4.23
  -2   3  -6  169.11    5.53
  -2  -3   6  156.52    5.45
   2  -3  -6  169.97    5.95
   2   3   6  161.24    5.48
   2  -3  -6  166.73    4.92
   2   4  -6   90.11    4.34
  -2  -4  -6   92.46    3.95
   2  -4   6   82.40    4.59
  -2   4   6   90.58    4.03
  -2  -4  -6   89.97    3.99
   2   4  -6   89.18    3.12
  -2  -4  -6   94.11    4.20
   2  -4  -6   95.79    4.35
  -2   4  -6   89.93    3.76
  -2   4  -6   90.98    3.10
  -2   4  -6   90.04    4.31
   2  -4  -6   90.47    3.69
  -2  -5  -6  109.64    4.54
   2   5  -6  109.36    5.04
  -2   5   6  110.17    4.64
   2   5  -6  111.72    3.96
   2  -5   6  110.78    5.61
  -2  -5  -6  111.27    4.85
  -2  -5  -6  115.33    4.89
   2  -5  -6  113.55    5.05
   2  -5  -6  115.16    4.66
  -2   5  -6  119.15    5.18
  -2   5  -6  106.02    4.26
  -2   5  -6  113.62    3.93
  -2  -6  -6   57.21    3.63
  -2  -6  -6   56.88    3.47
   2   6  -6   65.19    3.13
   2   6  -6   59.52    3.70
  -2   6  -6   60.84    3.02
   2  -6  -6   59.25    3.73
   2  -6  -6   62.77    3.59
   2   7  -6   72.69    4.29
  -2  -7  -6   67.89    4.31
   2   7  -6   72.11    3.73
  -2  -7  -6   62.78    3.86
   2  -7  -6   71.00    4.29
  -2   7  -6   73.12    3.66
   2  -7  -6   72.17    4.21
   2   8  -6   32.76    2.90
  -2  -8  -6   39.81    3.52
   2  -8  -6   37.94    3.33
   2  -8  -6   38.51    3.35
  -2   8  -6   38.20    2.88
   2   0  -7    0.96    0.89
  -2   0   7    2.28    1.33
   2   0  -7   -0.67    0.81
   2   0   7    1.06    0.83
  -2   0  -7   -0.33    0.73
   2   0  -7    0.04    0.47
  -2   0  -7    0.58    0.73
  -2  -1  -7    0.20    0.74
  -2  -1  -7   -0.22    0.68
   2   1  -7    2.03    0.96
   2   1  -7   -2.31    1.03
   2  -1   7    0.29    0.79
  -2  -1  -7    0.89    0.64
  -2   1   7    0.89    1.11
   2  -1  -7    0.30    0.76
  -2   1  -7    0.27    0.66
   2   1   7    1.08    0.94
   2  -1  -7    0.47    0.45
   2   2  -7    2.16    1.01
   2   2  -7   -0.74    0.84
   2  -2   7    0.68    0.85
  -2   2   7   -0.04    0.83
  -2  -2  -7   -0.01    0.63
  -2  -2  -7   -1.48    0.77
  -2  -2  -7    0.63    0.75
  -2   2  -7    0.83    0.78
  -2  -2   7    0.14    0.70
   2  -2  -7    0.85    0.88
   2  -2  -7    0.06    0.41
  -2   2  -7    1.05    0.77
   2   2   7    0.39    0.76
  -2  -3  -7   -1.30    0.85
  -2  -3  -7    0.53    0.75
   2   3  -7    0.60    0.96
  -2   3   7   -1.29    0.88
  -2  -3  -7   -0.85    0.73
   2  -3   7    0.52    1.05
  -2  -3   7   -0.76    0.87
  -2   3  -7    0.06    0.68
   2  -3  -7    1.04    0.81
   2  -3  -7    0.10    0.46
  -2   3  -7   -0.73    0.87
  -2  -4  -7    2.25    1.04
   2   4  -7    0.11    0.97
   2  -4   7    1.26    1.24
  -2   4   7   -0.33    0.74
  -2  -4  -7   -0.27    0.79
  -2  -4  -7   -0.01    0.78
   2  -4  -7    0.16    0.70
   2  -4  -7   -0.33    0.94
  -2   4  -7    3.48    1.23
  -2   4  -7    2.34    0.93
  -2  -5  -7    1.71    1.03
  -2  -5  -7    0.62    0.82
   2  -5   7    0.96    1.38
   2   5  -7    0.06    1.00
   2  -5  -7    0.27    0.75
  -2   5  -7   -0.79    1.00
  -2   5  -7    0.52    1.16
   2  -5  -7    0.46    0.88
   2   6  -7    0.14    1.08
  -2  -6  -7    1.08    1.18
  -2  -6  -7   -1.84    1.12
   2  -6  -7   -1.43    1.14
   2  -6  -7    1.49    1.00
   2   7  -7    0.14    1.46
  -2  -7  -7   -1.20    1.25
  -2  -7  -7   -1.75    1.26
   2  -7  -7    0.08    1.25
   2  -7  -7    3.26    1.46
  -2   0  -8   86.89    4.08
   2   0  -8   81.47    3.38
   2   0  -8   84.76    4.50
  -2   0  -8   85.57    4.43
   2   0  -8   79.35    4.21
  -2   0   8   83.51    5.06
   2   0   8   88.61    4.68
   2   1  -8   99.92    5.00
   2  -1   8  101.89    5.26
  -2   1   8  107.19    5.43
  -2  -1  -8  100.67    4.42
   2   1  -8  101.33    4.10
  -2  -1  -8   97.17    4.81
   2   1  -8  110.37    5.07
   2  -1  -8  103.38    4.87
   2  -1  -8   99.69    5.02
   2   1   8  102.65    5.22
  -2  -1   8  103.03    5.77
  -2   1  -8  105.53    4.63
  -2  -1   8  105.75    4.89
  -2   2   8   74.44    4.11
   2   2  -8   84.56    4.56
  -2  -2  -8   84.27    4.47
   2  -2   8   87.95    4.92
   2   2  -8   85.19    4.41
  -2  -2  -8   88.53    3.99
   2  -2  -8   85.45    4.49
  -2  -2   8   84.79    4.38
  -2   2  -8   89.44    4.36
   2   2   8   89.54    4.85
   2  -3   8  100.58    5.36
   2   3  -8   89.75    4.76
  -2  -3  -8   86.49    4.57
  -2  -3  -8   88.38    4.10
  -2  -3  -8   85.07    3.99
  -2   3  -8   99.17    4.82
   2   3   8   96.46    5.17
   2  -3  -8   99.91    4.98
   2  -4   8   69.79    4.76
   2   4  -8   71.56    4.24
  -2  -4  -8   72.66    4.18
  -2  -4  -8   72.78    3.80
   2  -4  -8   69.87    3.16
  -2   4  -8   71.60    3.92
  -2   4  -8   73.54    4.27
   2  -4  -8   77.24    4.37
  -2  -5  -8   64.49    3.88
   2   5  -8   64.29    4.12
  -2  -5  -8   62.32    4.08
   2  -5  -8   67.01    4.23
   2  -5  -8   66.10    3.39
  -2   5  -8   67.27    4.28
  -2  -6  -8   46.66    3.55
   2   6  -8   43.13    3.53
  -2  -6  -8   47.01    3.58
   2  -6  -8   44.44    3.61
   2  -6  -8   43.11    3.03
   2   0  -9    0.07    1.02
   2   0  -9   -1.19    1.07
  -2   0  -9    2.33    1.71
   2   0   9    2.80    1.35
  -2   0  -9   -0.93    1.19
   2  -1   9   -1.55    1.31
   2   1  -9   -3.06    1.36
   2   1  -9   -0.20    1.07
  -2  -1  -9   -0.97    0.99
  -2  -1  -9    2.64    1.35
   2  -1  -9    0.79    1.16
  -2  -1   9   -0.31    2.59
  -2   1  -9    0.00    1.04
  -2  -1   9    0.52    0.95
   2   1   9    2.45    1.27
   2   2  -9    0.99    1.26
   2  -2   9   -0.03    1.12
   2   2  -9   -0.83    1.17
  -2  -2  -9   -0.86    1.13
  -2  -2  -9    0.98    1.40
   2   2   9   -0.95    1.04
  -2   2  -9   -0.69    1.06
   2  -2  -9   -2.38    1.29
  -2  -2   9    1.52    1.24
   2   3  -9    1.07    1.19
  -2  -3  -9   -1.23    1.14
   2  -3   9    1.00    1.40
   2   3   9   -0.88    1.12
  -2   3  -9    3.23    1.40
   2  -3  -9    0.28    1.07
   2   4  -9    2.53    1.38
  -2  -4  -9   -1.76    1.25
   2  -4  -9    2.50    1.45
   2   4   9   -0.96    1.23
  -2  -5  -9    0.26    1.18
   2   5  -9   -0.28    1.55
   2  -5  -9    0.58    1.36
   2   5   9    0.11    1.33
  -2   0  10   41.31    3.64
  -2   0 -10   48.11    3.36
   2   0 -10   46.83    3.83
   2   0 -10   42.65    3.68
   2   0  10   47.01    4.03
  -2  -1 -10   54.32    3.46
   2  -1  10   67.04    4.89
   2   1 -10   59.24    4.23
  -2  -1 -10   64.43    4.37
   2   1 -10   58.50    4.22
  -2  -1  10   55.23    4.12
  -2   1 -10   54.08    3.71
   2  -1 -10   57.79    4.19
   2   1  10   57.94    4.45
   2   2 -10   42.09    3.67
   2  -2  10   40.27    3.97
  -2  -2 -10   39.81    3.51
  -2   2 -10   42.07    3.35
   2  -2 -10   44.31    3.71
   2   2  10   37.00    3.69
   2   3 -10   50.30    4.02
   2  -3  10   45.44    4.22
  -2  -3 -10   48.59    3.79
   2   3  10   44.61    4.06
  -2   3 -10   50.47    3.82
   2  -3 -10   51.81    4.04
  -2  -4 -10   25.51    3.06
   2   4 -10   28.79    3.30
   2  -4 -10   28.13    3.18
   2   4  10   30.47    3.44
  -2   4 -10   31.00    3.26
  -3   0   0  842.81   19.33
  -3   0   0  903.25   18.28
   3   0   0  879.37   18.21
   3   0   0  886.52   19.49
  -3   0   0  874.90   19.00
   3   1   0   77.85    3.04
  -3  -1   0   73.80    2.95
  -3   1   0   71.03    2.72
   3  -1   0   73.90    2.92
  -3   1   0   76.98    2.97
   3  -1   0   72.93    2.66
  -3  -1   0   73.66    2.33
   3   1   0   73.05    2.28
  -3   1   0   67.98    2.31
  -3   2   0  759.93   16.74
   3   2   0  803.39   16.82
  -3  -2   0  761.74   16.78
  -3   2   0  768.77   16.75
   3  -2   0  794.19   16.80
   3   2   0  787.81   16.04
   3  -2   0  763.65   16.74
   3  -2   0  745.42   17.31
  -3   2   0  758.74   15.82
   3   3   0   52.78    1.66
   3   3   0   55.01    2.51
  -3   3   0   54.44    2.48
   3  -3   0   51.24    2.43
  -3   3   0   53.85    2.59
   3  -3   0   54.85    2.47
  -3   3   0   51.29    1.86
  -3  -3   0   52.59    2.43
  -3   4   0  471.50   11.46
   3  -4   0  489.39   11.51
   3   4   0  468.94   11.46
   3   4   0  463.58   10.07
  -3  -4   0  473.61   11.53
   3   4   0  427.83   15.77
   3  -4   0  453.70   11.36
  -3  -5   0   34.73    2.33
   3   5   0   33.02    2.33
  -3  -5   0   32.86    1.25
   3  -5   0   33.27    2.30
  -3   5   0   32.21    2.23
   3  -5   0   31.96    2.15
   3  -6   0  264.46    8.31
   3   6   0  266.35    8.42
   3  -6   0  260.80    7.96
  -3  -6   0  265.99    8.41
  -3   6   0  254.22    8.22
  -3   7   0   16.67    1.97
   3   7   0   20.52    2.21
   3  -7   0   20.05    1.92
  -3  -7   0   18.15    2.08
   3  -7   0   17.39    2.01
  -3   8   0  157.48    6.73
   3  -8   0  154.56    6.74
   3   8   0  149.20    6.61
  -3  -8   0  146.57    6.61
   3  -9   0   11.35    2.18
  -3  -9   0   10.73    2.05
   3  -9   0   12.81    2.24
  -3   9   0   11.51    2.12
   3   9   0   11.81    2.01
  -3   0   1   -0.53    0.76
  -3   0  -1    0.16    0.37
   3   0   1   -0.84    0.62
   3   0   1   -0.48    0.79
  -3   0   1    0.42    0.44
  -3   0  -1    1.09    0.81
   3   0   1   -0.24    0.46
   3   0  -1   -0.83    0.70
   3   0  -1   -0.23    0.38
   3   0  -1    0.28    0.75
   3   1  -1    9.56    0.60
  -3   1   1    9.89    0.99
   3   1  -1    9.36    1.02
  -3   1   1    8.48    0.65
  -3   1   1    9.59    1.26
   3   1  -1    9.80    1.09
   3  -1   1   10.69    1.12
  -3  -1  -1   10.66    1.15
   3  -1   1    8.96    1.13
  -3   1  -1   10.76    0.92
   3  -1  -1    9.41    0.69
  -3  -1   1   10.20    1.08
  -3  -1   1    9.07    0.67
   3   1   1   12.06    1.20
   3   1   1    9.16    0.86
   3   1   1    9.70    0.77
  -3   1  -1    9.53    0.85
   3  -1  -1    8.04    0.82
  -3   1  -1   11.71    1.22
   3  -1  -1   10.44    1.03
  -3   2   1    0.36    0.63
  -3   2   1    0.48    0.17
   3  -2   1    2.22    0.89
  -3  -2  -1    0.58    0.52
  -3  -2  -1   -0.24    0.27
   3   2  -1    0.50    0.51
  -3   2   1    0.68    0.57
   3  -2   1    0.54    0.51
  -3  -2   1    0.36    0.49
   3   2   1    1.47    0.59
   3  -2  -1    0.30    0.45
  -3   2  -1    1.16    0.56
  -3   2  -1    0.55    0.42
   3  -2  -1    0.43    0.24
   3   2   1    0.54    0.30
   3   2   1    0.53    0.36
   3  -2  -1   -0.93    0.54
  -3   2  -1    0.37    0.53
  -3  -3  -1    1.70    0.64
   3  -3   1    2.86    0.91
   3   3  -1    2.34    0.67
  -3   3   1    2.60    0.77
   3  -3   1    2.92    0.69
  -3   3   1    2.27    0.63
  -3  -3  -1    2.43    0.37
  -3  -3   1    2.08    0.62
   3  -3  -1    2.09    0.62
   3   3   1    2.54    0.46
   3  -3  -1    2.27    0.32
   3   3   1    2.79    0.72
   3  -3  -1    2.26    0.64
   3   3   1    1.80    0.35
  -3   3  -1    1.89    0.63
  -3   3  -1    1.41    0.47
   3  -4   1    0.91    0.53
  -3  -4  -1    0.31    0.54
  -3   4   1    0.51    0.74
   3   4  -1    0.30    0.54
  -3   4   1    0.58    0.56
  -3  -4  -1    0.42    0.27
   3  -4   1   -0.37    0.65
  -3   4   1    0.25    0.17
   3  -4  -1    0.21    0.51
   3   4   1    0.02    0.49
  -3  -4   1   -0.09    0.48
  -3   4  -1   -0.51    0.45
  -3   4  -1    1.09    0.57
   3  -4  -1    0.59    0.64
  -3  -5  -1    0.06    0.67
   3   5  -1    1.57    0.72
  -3   5   1    3.49    0.90
   3  -5   1    0.99    0.78
  -3  -5  -1    1.84    0.41
   3  -5   1    1.20    0.68
   3   5   1    1.89    0.83
  -3   5  -1    2.79    0.82
   3  -5  -1    3.24    0.85
  -3  -5   1    3.34    0.87
   3  -5  -1    3.15    0.87
   3   6  -1    0.33    0.65
  -3   6   1    1.22    0.81
  -3  -6  -1   -0.52    0.36
   3  -6   1    0.00    0.59
  -3  -6  -1   -0.45    0.70
   3  -6   1   -0.05    0.68
   3  -6  -1    0.42    0.77
   3  -6  -1    0.55    0.65
  -3  -6   1    0.57    0.63
  -3   6  -1    0.56    0.70
   3   6   1   -0.18    0.68
  -3  -7  -1    1.30    0.87
   3  -7   1    0.16    0.82
   3   7  -1    1.13    0.87
  -3   7   1   -1.24    0.89
   3  -7   1   -0.95    0.80
   3  -7  -1   -0.96    0.82
   3   7   1    1.40    0.91
  -3  -7   1    0.65    0.79
  -3   7  -1    1.17    0.96
  -3   8   1    0.12    1.07
   3   8  -1    0.16    1.02
  -3  -8  -1    1.12    1.13
   3  -8   1    0.28    1.07
   3  -8   1    0.14    0.84
  -3   8  -1   -0.42    1.07
   3   8   1    1.23    1.06
   3  -8  -1    0.87    1.12
  -3  -8   1    0.66    1.00
   3  -9   1    0.29    1.31
   3   9  -1    2.85    1.32
  -3  -9  -1   -0.61    1.18
   3  -9   1    0.42    1.34
  -3   9   1    0.39    1.29
  -3  -9   1    0.36    1.95
   3  -9  -1    2.35    1.43
  -3   9  -1    1.63    1.30
   3  -9  -1   -0.48    1.17
   3   9   1    1.17    1.11
  -3   0  -2  642.73   15.09
  -3   0   2  687.78   14.45
  -3   0  -2  627.86   14.92
   3   0  -2  668.02   14.42
  -3   0  -2  644.11   14.34
  -3   0   2  644.47   15.36
   3   0  -2  651.49   13.95
   3   0  -2  647.65   13.57
   3   0   2  638.49   13.55
   3   0   2  634.74   14.27
   3   0  -2  582.18   14.50
   3   0  -2  652.39   13.46
   3   0   2  662.63   15.34
  -3   0  -2  621.90   13.12
   3  -1   2   81.16    2.52
  -3  -1  -2   91.29    3.39
   3   1  -2   86.57    3.35
   3   1  -2   85.44    3.03
   3   1  -2   81.13    2.31
  -3   1   2   85.79    2.93
   3  -1   2   88.44    3.32
   3  -1   2   87.42    3.38
  -3   1   2   92.52    4.08
  -3  -1  -2   85.06    2.78
   3   1  -2   82.59    2.99
  -3   1  -2   85.03    3.07
  -3  -1   2   91.02    3.44
  -3   1  -2   84.76    2.59
   3  -1  -2   81.36    2.85
  -3   1  -2   85.36    3.49
   3   1   2   87.44    3.35
   3  -1  -2   82.23    2.87
   3   1   2   85.55    2.98
  -3   1  -2   85.27    3.34
  -3  -1   2   84.44    2.38
   3  -1  -2   80.23    2.95
   3  -1  -2   84.78    2.78
   3   2  -2  493.22   12.37
  -3   2   2  560.91   13.39
  -3  -2  -2  551.20   12.69
  -3  -2  -2  535.54   11.83
   3  -2   2  536.26   12.08
   3  -2   2  538.13   13.02
   3   2  -2  572.26   12.57
   3  -2   2  540.72   12.48
  -3   2   2  560.84   12.37
   3  -2  -2  566.49   12.56
  -3   2  -2  551.85   12.41
   3   2   2  544.47   12.68
   3  -2  -2  558.24   12.34
   3  -2  -2  565.54   11.88
  -3  -2   2  545.89   12.45
  -3   2  -2  557.38   12.53
   3   2   2  541.18   12.17
  -3   3   2   58.70    2.95
  -3   3   2   62.15    2.65
  -3  -3  -2   57.59    2.73
  -3  -3  -2   60.62    2.19
   3   3  -2   63.48    2.60
   3  -3   2   58.13    2.97
   3  -3   2   58.32    2.61
  -3   3  -2   62.29    2.54
  -3  -3   2   61.91    2.62
   3   3   2   59.40    2.79
   3  -3  -2   59.40    2.70
   3  -3  -2   61.23    2.66
  -3   3  -2   59.33    2.60
   3   4  -2  393.29    9.78
   3  -4   2  398.04   10.45
   3  -4   2  385.93    9.83
  -3   4   2  393.69   10.39
  -3  -4  -2  384.43    8.92
  -3  -4  -2  390.46   10.19
  -3   4   2  388.51   10.02
  -3   4  -2  392.81    9.62
  -3  -4   2  380.02    9.75
   3  -4  -2  391.01   10.04
   3   4   2  379.47   10.05
  -3   4  -2  382.64    9.73
   3  -4  -2  380.92   10.01
   3  -5   2   36.17    2.45
   3  -5   2   35.82    2.34
  -3  -5  -2   39.60    1.87
   3   5  -2   36.70    2.31
  -3  -5  -2   39.52    2.58
  -3   5   2   37.90    2.49
  -3   5   2   40.21    2.67
  -3  -5   2   37.56    2.39
  -3   5  -2   39.28    2.30
  -3   5  -2   41.57    2.48
   3  -5  -2   34.57    2.38
   3  -5  -2   37.45    2.48
   3   5   2   38.28    2.53
   3   6  -2  242.35    7.60
   3  -6   2  239.74    7.70
  -3  -6  -2  232.26    6.23
   3  -6   2  230.42    7.46
  -3  -6  -2  224.22    7.79
  -3   6   2  240.49    7.81
   3  -6  -2  245.12    7.84
   3   6   2  243.35    8.06
  -3   6  -2  234.66    7.64
  -3  -6   2  237.51    7.57
  -3   7   2   15.71    2.04
   3  -7   2   18.26    2.05
   3  -7   2   18.00    1.90
   3   7  -2   16.94    1.94
  -3  -7  -2   15.67    1.98
   3   7   2   18.63    2.15
   3  -7  -2   16.39    2.08
  -3   7  -2   16.30    1.95
  -3  -7   2   19.46    2.04
   3  -7  -2   17.13    1.92
  -3  -8  -2  117.65    5.87
   3  -8   2  109.39    5.56
  -3   8   2  116.71    5.83
   3   8  -2  122.76    5.63
   3  -8  -2  121.96    5.94
   3   8   2  112.66    5.74
  -3   8  -2  113.62    5.63
  -3  -8   2  119.99    5.75
   3  -8  -2  115.78    5.31
  -3  -9  -2    7.47    1.93
  -3   9   2   11.56    2.23
   3   9  -2    6.93    1.80
  -3   9  -2   10.39    2.04
   3   9   2    9.24    1.99
   3  -9  -2    8.18    1.94
   3  -9  -2    4.86    1.55
   3   0   3   -0.37    0.25
  -3   0  -3   -1.32    0.63
   3   0   3    0.74    0.57
   3   0  -3    0.26    0.44
  -3   0   3   -0.29    0.41
   3   0  -3    0.16    0.32
  -3   0   3    0.44    0.80
  -3   0  -3    0.18    0.56
   3   0  -3   -1.13    0.63
  -3   0  -3    0.39    0.72
   3   0  -3    1.02    0.47
   3   0   3    1.06    0.76
   3  -1   3    5.28    0.95
  -3   1   3    4.16    1.27
   3   1  -3    5.32    0.83
   3   1  -3    3.76    0.81
  -3  -1  -3    3.95    0.82
  -3   1   3    5.12    0.64
  -3   1   3    3.96    0.36
   3  -1   3    4.10    0.81
  -3  -1  -3    4.37    0.91
   3   1  -3    4.69    0.58
  -3  -1  -3    4.10    0.70
   3   1  -3    3.73    0.58
  -3  -1   3    3.27    0.77
  -3   1  -3    3.48    0.94
  -3   1  -3    2.92    0.78
   3  -1  -3    3.51    0.57
   3  -1  -3    4.14    0.69
   3   1   3    4.69    0.83
  -3   1  -3    3.92    0.79
   3  -1  -3    3.39    0.67
   3  -1  -3    5.20    0.76
   3   1   3    4.97    0.92
  -3   2   3    0.90    0.44
   3   2  -3    0.56    0.54
   3   2  -3   -0.28    0.50
  -3   2   3   -1.10    0.78
   3   2  -3    0.20    0.32
   3  -2   3    0.98    0.89
   3  -2   3    1.05    0.49
  -3  -2  -3    0.59    0.43
  -3  -2  -3   -0.02    0.47
   3  -2  -3    0.21    0.38
  -3   2  -3    0.37    0.47
  -3   2  -3   -0.64    0.69
   3  -2  -3   -0.15    0.45
  -3  -2   3    0.04    0.19
   3  -2  -3    0.73    0.44
  -3   2  -3    1.23    0.59
   3   2   3   -0.39    0.49
  -3  -2   3    0.01    0.19
  -3  -2   3   -0.01    0.46
   3   2   3   -0.64    0.52
   3   3  -3    0.68    0.48
  -3  -3  -3    1.44    0.36
   3  -3   3    1.44    0.59
   3  -3   3    0.47    0.81
   3   3  -3    1.53    0.53
   3   3  -3    1.36    0.56
  -3   3   3    1.08    0.74
  -3  -3  -3    1.69    0.65
   3   3  -3    2.13    0.70
  -3   3   3    0.92    0.47
  -3   3  -3    1.35    0.66
  -3   3  -3    1.28    0.58
   3  -3  -3    1.54    0.67
  -3  -3   3    1.26    0.53
   3  -3  -3    0.97    0.49
   3   3   3    0.21    0.51
  -3   4   3   -0.10    0.51
  -3   4   3    1.12    0.81
  -3  -4  -3    0.92    0.63
   3   4  -3    0.27    0.63
   3  -4   3    0.56    0.53
   3   4  -3    0.12    0.53
   3  -4   3    1.88    0.99
  -3  -4  -3    0.02    0.37
   3  -4  -3    0.21    0.56
  -3  -4   3   -0.67    0.50
   3  -4  -3   -0.21    0.57
   3   4   3    0.93    0.58
  -3   4  -3   -0.13    0.54
  -3   4  -3    0.20    0.27
  -3   4  -3    0.11    0.51
   3  -5   3    2.58    1.09
   3  -5   3    1.95    0.74
  -3  -5  -3    1.10    0.52
  -3   5   3    0.64    0.59
  -3  -5  -3    1.87    0.86
   3   5  -3    2.32    0.72
  -3   5   3    0.60    0.91
   3   5  -3    0.01    0.72
  -3  -5   3    0.62    0.58
   3   5   3    1.32    0.75
   3  -5  -3    1.78    0.75
  -3   5  -3    2.55    0.84
  -3   5  -3    1.96    0.73
   3  -6   3   -1.35    0.79
  -3   6   3   -0.30    0.72
  -3  -6  -3    0.36    0.50
   3   6  -3    0.84    0.69
  -3  -6  -3    0.64    0.77
   3   6  -3   -1.33    0.94
   3   6   3    0.44    0.76
   3  -6  -3    1.16    0.80
  -3  -6   3    0.26    0.59
  -3   6  -3    0.51    0.72
   3  -6  -3    0.38    0.76
   3   7  -3   -1.19    0.95
   3   7  -3   -0.03    0.93
   3  -7   3   -0.69    0.86
   3  -7   3   -1.21    0.87
  -3  -7  -3    0.90    0.89
  -3   7   3    0.21    0.96
   3  -7  -3   -1.74    1.08
   3   7   3    0.83    0.88
   3  -7  -3    1.16    0.84
  -3   7  -3   -1.11    0.90
   3   8  -3   -1.50    1.32
  -3   8   3    1.24    1.19
   3   8  -3    0.92    1.09
  -3  -8  -3    1.68    1.19
  -3   8  -3   -0.21    0.99
   3  -8  -3   -0.20    0.95
   3  -8  -3   -0.38    0.99
   3   8   3    0.10    0.93
   3  -8  -3    0.27    1.01
  -3   9   3    2.28    1.51
   3   9  -3   -2.42    1.43
  -3  -9  -3    2.75    1.43
   3  -9  -3    2.52    1.29
   3   9   3    0.85    1.39
   3  -9  -3   -1.15    1.32
  -3   9  -3   -1.12    1.36
  -3   0  -4  517.40   12.91
   3   0   4  531.35   13.10
   3   0  -4  494.43   12.89
  -3   0  -4  525.10   12.53
   3   0  -4  531.40   11.96
   3   0   4  500.13   12.65
   3   0  -4  549.50   12.61
   3   0  -4  527.72   11.20
  -3   0  -4  544.13   12.72
  -3   0   4  528.54   14.00
  -3   0  -4  530.16   12.50
  -3   0   4  533.46   11.55
  -3  -1  -4   40.94    2.09
  -3  -1  -4   49.63    2.60
  -3   1   4   47.35    3.26
   3   1  -4   46.80    1.92
   3  -1   4   46.25    2.29
   3  -1   4   46.11    2.62
  -3  -1  -4   47.18    2.50
   3   1  -4   46.75    2.06
  -3   1   4   44.67    1.63
  -3   1   4   46.86    1.85
   3   1  -4   43.20    1.68
  -3  -1  -4   46.18    2.29
   3   1  -4   46.05    2.47
   3  -1  -4   47.34    2.40
   3  -1  -4   44.65    2.12
   3   1   4   45.71    2.51
   3  -1  -4   47.37    2.30
  -3  -1   4   45.05    1.89
   3   1   4   48.26    2.61
   3  -1  -4   45.56    1.81
  -3   1  -4   46.97    2.27
  -3   1  -4   49.62    2.57
  -3  -2  -4  471.38   11.78
   3   2  -4  441.11   12.34
   3  -2   4  468.95   10.84
   3   2  -4  482.24   10.72
   3   2  -4  481.73   11.73
  -3   2   4  468.23   12.72
  -3  -2  -4  474.06   11.53
   3   2  -4  470.43   11.07
   3  -2   4  475.58   12.23
  -3   2   4  485.98   10.77
  -3  -2  -4  467.68   11.14
   3  -2  -4  434.00   13.45
   3   2   4  463.52   11.54
  -3  -2   4  461.42   11.08
  -3   2  -4  434.79   12.01
   3  -2  -4  478.00   11.38
   3  -2  -4  475.90   11.43
  -3   2  -4  499.07   11.75
  -3   2  -4  454.10   10.76
   3  -2  -4  479.08   10.71
   3   2   4  462.91   11.61
  -3   3   4   35.56    2.53
   3   3  -4   35.92    1.93
   3  -3   4   34.61    1.86
  -3   3   4   32.85    1.91
   3  -3   4   38.17    2.79
  -3  -3  -4   33.97    2.02
   3   3  -4   37.11    2.39
  -3  -3  -4   35.41    2.23
   3  -3  -4   33.55    2.14
  -3   3  -4   35.26    1.88
  -3  -3   4   32.07    1.40
  -3   3  -4   37.31    2.27
  -3  -3   4   36.72    1.97
   3  -3  -4   32.04    1.92
   3   3   4   35.35    2.22
  -3   4   4  339.44    9.63
  -3   4   4  326.94    8.88
  -3  -4  -4  332.07    9.22
   3   4  -4  326.22    8.53
   3   4  -4  312.88    9.19
   3  -4   4  319.36    8.54
  -3  -4  -4  330.95    8.64
   3  -4   4  321.85   10.02
  -3   4  -4  338.28    9.26
   3  -4  -4  326.56    8.82
  -3   4  -4  324.32    8.56
   3  -4  -4  342.57    9.30
  -3  -4   4  334.16    8.63
  -3   4  -4  318.08    7.79
   3   4   4  323.20    9.19
  -3  -5  -4   25.52    2.18
   3  -5   4   25.80    2.66
  -3   5   4   17.95    2.05
   3  -5   4   21.55    1.78
   3   5  -4   22.67    2.09
   3   5  -4   21.60    1.78
  -3  -5  -4   20.46    1.65
  -3   5   4   22.73    1.96
   3   5   4   23.31    2.07
  -3   5  -4   22.72    2.02
  -3  -5   4   20.92    1.74
   3  -5  -4   19.09    1.93
  -3   5  -4   22.22    1.80
   3  -5  -4   22.26    1.93
  -3  -6  -4  200.11    7.26
   3   6  -4  190.93    6.95
   3   6  -4  192.79    6.63
   3  -6   4  211.94    7.56
  -3  -6  -4  194.19    6.28
  -3   6   4  196.41    7.03
   3  -6  -4  209.55    7.16
  -3   6  -4  199.20    6.64
   3  -6  -4  198.76    7.03
   3   6   4  189.13    7.16
  -3  -7  -4   13.65    1.56
   3   7  -4   15.68    1.87
  -3   7   4   15.00    2.02
   3  -7   4   12.40    1.79
  -3  -7  -4   16.02    2.14
   3   7  -4   15.65    2.02
   3  -7  -4   12.66    1.83
   3  -7  -4   14.70    1.97
  -3   7  -4   16.18    1.92
   3   7   4   10.41    1.82
   3   8  -4  112.04    5.49
  -3  -8  -4  118.01    6.04
  -3   8   4  120.87    6.01
   3   8  -4  109.55    5.42
   3  -8  -4  110.27    5.45
   3   8   4   94.97    5.54
   3  -8  -4  120.67    5.94
  -3   8  -4  116.91    5.48
  -3  -9  -4    7.73    2.01
   3   9  -4    8.01    1.92
  -3   9   4    7.26    1.98
   3  -9  -4    5.76    1.82
   3  -9  -4    6.29    1.84
   3   0   5   -0.01    0.67
   3   0  -5   -0.13    0.36
   3   0   5    0.53    0.64
  -3   0  -5   -1.47    0.77
  -3   0   5   -0.72    1.03
   3   0  -5    0.00    0.47
  -3   0   5   -0.55    0.31
  -3   0  -5    0.90    0.75
   3   0  -5   -0.25    0.22
   3   0  -5   -0.81    0.66
  -3   0  -5    0.36    0.66
  -3   0  -5    1.25    0.74
  -3   1   5    0.15    1.01
   3  -1   5    2.13    0.94
  -3  -1  -5    1.25    0.72
   3   1  -5    1.37    0.25
  -3   1   5    1.62    0.38
   3   1  -5    1.38    0.58
  -3  -1  -5    1.72    0.79
   3  -1   5    1.28    0.58
  -3  -1  -5    1.94    0.78
   3   1   5    1.80    0.87
  -3   1  -5    2.29    0.60
  -3   1  -5    1.75    0.65
  -3   1  -5    0.98    0.68
   3  -1  -5    1.74    0.60
   3  -1  -5    0.66    0.33
   3  -1  -5    1.96    0.78
   3   1   5    1.42    0.72
   3   2  -5    1.37    0.63
   3  -2   5   -2.06    1.01
  -3  -2  -5    0.77    0.66
  -3   2   5    0.41    0.40
  -3  -2  -5   -0.17    0.50
   3   2  -5   -0.09    0.28
   3   2  -5    0.13    0.44
   3  -2   5    0.30    0.42
  -3   2   5    2.35    1.17
   3   2  -5   -0.67    0.64
  -3  -2  -5    0.79    0.67
   3   2   5   -0.92    0.72
   3  -2  -5    0.38    0.61
   3  -2  -5   -0.25    0.37
   3   2   5    1.04    0.70
   3  -2  -5   -0.21    0.56
  -3  -2   5    0.44    0.44
  -3   2  -5    0.35    0.40
  -3   2  -5   -0.83    0.69
  -3  -3  -5    1.69    0.82
   3  -3   5   -0.81    1.11
  -3   3   5    0.31    0.93
  -3  -3  -5    0.03    0.78
  -3  -3  -5    0.74    0.58
   3   3  -5    0.12    0.54
  -3   3   5    0.31    0.48
   3  -3   5    0.18    0.44
   3   3  -5    0.14    0.64
   3   3   5   -0.29    0.64
  -3   3  -5    0.15    0.37
   3  -3  -5    0.63    0.76
  -3   3  -5   -0.34    0.66
  -3  -3   5    0.65    0.51
   3  -3  -5   -0.21    0.46
   3   4  -5    0.04    0.74
   3  -4   5   -2.23    1.34
  -3   4   5   -0.21    0.55
  -3   4   5    1.64    0.94
  -3  -4  -5    0.54    0.88
  -3  -4  -5    0.96    0.69
  -3  -4  -5   -1.33    0.73
   3   4  -5   -0.59    0.57
  -3   4  -5    0.31    0.51
   3   4   5   -0.34    0.67
   3  -4  -5   -1.81    0.83
   3  -4  -5   -0.22    0.54
  -3   4  -5   -0.41    0.50
  -3   4  -5   -2.12    0.92
  -3   5   5    2.26    1.00
  -3   5   5    1.02    0.80
   3   5  -5   -0.15    0.78
  -3  -5  -5    0.75    0.66
   3   5  -5   -0.10    0.65
   3  -5   5    0.36    1.28
   3  -5  -5    2.23    0.89
  -3   5  -5    0.74    0.81
   3   5   5    0.59    0.85
   3  -5  -5    2.63    0.98
  -3   5  -5    1.40    0.70
   3  -6   5    3.67    1.46
   3   6  -5   -0.01    0.78
   3   6  -5    0.42    0.75
  -3  -6  -5   -0.96    0.79
  -3  -6  -5   -0.14    0.91
  -3   6   5    0.45    0.89
   3  -6  -5   -1.20    0.99
  -3   6  -5    0.17    0.71
   3   6   5    2.47    1.11
  -3   6  -5   -0.13    0.86
  -3  -7  -5   -0.73    0.85
  -3  -7  -5    0.67    1.12
   3   7  -5    0.51    1.16
   3   7  -5    0.89    1.09
  -3   7  -5   -0.16    0.77
   3   7   5    1.32    1.20
   3  -7  -5    2.06    1.09
   3  -7  -5   -1.76    1.10
   3   8  -5   -3.14    1.41
  -3  -8  -5    0.70    2.01
  -3   8  -5   -0.25    1.18
   3  -8  -5   -0.38    1.25
   3  -8  -5    1.69    1.68
   3   8   5   -1.32    1.44
   3   0   6  267.61    8.54
   3   0  -6  283.51    8.00
   3   0  -6  270.54    8.35
  -3   0   6  276.33    9.65
  -3   0  -6  280.82    8.22
  -3   0  -6  279.78    8.36
  -3   0  -6  284.10    7.51
  -3  -1  -6   30.60    2.23
   3   1  -6   33.55    2.42
  -3  -1  -6   33.29    2.35
  -3  -1  -6   31.77    2.30
  -3   1   6   28.90    2.86
   3   1  -6   28.47    2.05
   3  -1   6   31.51    2.59
   3  -1  -6   30.05    1.28
   3  -1  -6   32.28    2.25
  -3   1  -6   31.16    1.59
  -3   1  -6   34.27    2.34
   3  -1  -6   31.05    2.37
   3   1   6   33.13    2.50
   3   2  -6  250.80    8.06
  -3  -2  -6  264.92    7.90
  -3   2   6  262.59    9.11
   3  -2   6  254.22    8.56
   3   2  -6  259.10    7.64
  -3  -2  -6  251.45    7.79
  -3  -2  -6  253.26    7.89
   3  -2  -6  266.88    8.26
  -3   2  -6  264.88    8.11
   3  -2  -6  257.27    6.47
  -3   2  -6  267.59    6.41
  -3  -2   6  260.34    7.40
   3   2   6  246.12    7.76
   3   2   6  258.31    8.27
   3  -2  -6  262.05    7.88
  -3  -3  -6   31.70    2.28
  -3   3   6   28.70    2.50
  -3  -3  -6   32.35    2.35
   3   3  -6   26.27    2.33
  -3  -3  -6   28.75    2.20
   3  -3   6   27.03    2.62
  -3  -3   6   27.46    1.91
   3   3   6   31.72    2.49
  -3   3  -6   29.58    1.58
   3  -3  -6   28.42    1.75
  -3   3  -6   26.37    2.26
   3  -3  -6   29.72    2.29
   3   3   6   27.21    2.18
   3   4  -6  197.18    5.78
   3  -4   6  196.14    7.77
  -3  -4  -6  196.52    6.84
  -3   4   6  190.12    6.98
   3   4  -6  199.52    7.18
  -3  -4  -6  195.43    6.67
  -3  -4  -6  201.10    6.89
  -3   4  -6  196.36    5.63
  -3   4  -6  199.95    7.01
   3  -4  -6  188.15    6.06
   3  -4  -6  205.62    7.06
   3  -5   6   25.49    2.79
  -3  -5  -6   23.04    2.06
   3   5  -6   19.26    1.71
  -3   5   6   17.49    2.06
  -3  -5  -6   20.86    2.16
   3   5  -6   21.08    2.21
  -3  -5  -6   19.85    2.15
   3  -5  -6   18.80    2.05
   3  -5  -6   20.63    1.95
   3  -5  -6   20.02    1.90
  -3   5  -6   22.03    2.30
  -3   5  -6   20.94    1.64
  -3   6   6  133.68    5.79
  -3  -6  -6  120.99    5.75
  -3  -6  -6  138.13    5.79
   3  -6   6  134.66    6.64
  -3  -6  -6  124.48    5.31
   3   6  -6  127.14    5.02
   3   6  -6  124.67    5.71
  -3   6  -6  129.51    4.91
   3  -6  -6  139.73    5.97
   3  -6  -6  133.66    5.49
  -3   6  -6  129.24    5.93
  -3  -7  -6   10.66    2.03
   3   7  -6   11.83    2.33
   3   7  -6   10.46    1.69
  -3  -7  -6    9.17    1.56
   3  -7  -6   10.13    1.91
   3  -7  -6   15.11    2.12
  -3   7  -6    9.32    1.55
  -3  -8  -6   68.45    4.75
  -3   8  -6   63.54    3.87
   3  -8  -6   71.33    4.55
   3  -8  -6   61.90    4.34
  -3   0  -7    0.21    0.83
  -3   0  -7    0.46    0.46
   3   0  -7   -0.75    0.76
   3   0   7    1.60    0.93
  -3   0  -7    0.30    0.68
   3   0  -7   -0.73    0.90
  -3   0   7   -1.00    1.17
   3   1  -7    2.46    1.02
  -3  -1  -7    0.42    0.73
  -3  -1  -7    1.93    0.97
   3  -1   7    0.92    0.89
  -3  -1  -7   -1.22    0.82
  -3   1   7    0.37    1.18
   3   1  -7   -0.31    0.80
   3  -1  -7    0.39    0.76
   3  -1  -7   -0.64    0.81
   3   1   7    2.79    1.05
  -3   1  -7    0.56    0.86
  -3  -1   7    2.95    1.29
   3   2  -7   -0.47    0.91
   3   2  -7   -1.71    0.96
  -3   2   7   -1.09    1.18
   3  -2   7   -2.45    1.20
  -3  -2  -7    2.21    1.00
  -3  -2  -7    0.08    0.80
  -3  -2  -7    0.74    0.90
  -3  -2   7   -0.35    0.71
   3  -2  -7    0.05    0.42
   3  -2  -7   -0.59    0.88
   3   2   7   -0.28    0.79
  -3   2  -7    0.60    0.93
   3  -2  -7    0.00    0.75
   3   3  -7   -0.82    0.96
  -3  -3  -7    1.59    0.98
  -3   3   7    1.54    1.07
  -3  -3  -7    0.61    0.75
  -3  -3  -7    0.73    0.84
   3  -3   7    0.65    1.09
  -3   3  -7    0.13    0.80
  -3   3  -7    0.43    0.85
   3   3   7    1.91    1.05
   3  -3  -7    1.69    0.63
   3  -3  -7    0.57    0.85
   3   4  -7    1.63    1.19
  -3  -4  -7   -0.81    0.72
   3  -4   7    1.13    1.20
  -3  -4  -7    1.10    0.93
  -3  -4  -7   -2.53    1.11
  -3   4   7    0.44    0.93
   3  -4  -7   -0.02    0.69
  -3   4  -7   -0.08    0.86
   3   4   7    0.29    1.01
  -3   4  -7   -0.75    0.54
   3  -4  -7   -0.64    1.04
  -3  -5  -7   -1.41    1.12
   3   5  -7    1.81    1.16
  -3  -5  -7   -0.44    0.93
  -3   5   7    0.89    1.01
  -3  -5  -7    0.34    1.01
   3  -5   7    0.88    1.51
   3  -5  -7    0.29    1.10
  -3   5  -7   -0.94    1.11
   3  -5  -7   -1.58    0.89
  -3  -6  -7   -1.47    1.35
  -3  -6  -7    0.10    0.98
   3   6  -7    1.06    1.21
   3  -6  -7   -0.95    1.00
   3  -6  -7    0.17    1.04
  -3   6  -7    1.10    1.59
  -3  -7  -7    0.64    1.78
   3   7  -7   -0.45    2.31
  -3  -7  -7   -0.91    1.51
   3  -7  -7   -1.15    1.23
   3  -7  -7   -0.04    1.87
  -3   0   8  180.53    8.04
  -3   0  -8  187.94    7.10
   3   0  -8  178.44    6.75
   3   0   8  196.97    7.66
  -3   0  -8  181.71    6.69
   3   0  -8  188.97    7.32
   3   1  -8   17.86    2.02
  -3  -1  -8   19.61    2.13
  -3  -1  -8   17.97    1.97
   3  -1   8   14.73    2.19
   3   1  -8   15.78    2.03
  -3   1   8   16.05    2.55
  -3  -1   8   13.06    2.39
  -3   1  -8   16.89    2.01
   3   1   8   16.66    2.19
   3  -1  -8   17.63    2.06
   3  -1  -8   15.77    2.05
  -3   2   8  165.23    7.05
   3   2  -8  166.67    6.60
   3   2  -8  169.56    6.87
   3  -2   8  167.68    7.37
  -3  -2  -8  170.28    6.28
  -3  -2  -8  164.55    5.81
  -3  -2  -8  168.73    6.64
  -3  -2   8  170.89    6.49
   3  -2  -8  167.74    6.97
   3  -2  -8  165.82    6.61
   3   2   8  174.38    7.27
  -3   2  -8  162.57    6.47
  -3  -3  -8   14.17    1.95
   3  -3   8   17.57    2.47
   3   3  -8   12.03    1.90
  -3   3   8   10.75    1.81
  -3  -3  -8   14.58    1.83
   3  -3  -8    9.96    1.72
  -3   3  -8   13.14    1.89
   3   3   8   10.28    1.80
  -3  -4  -8  127.05    5.70
  -3  -4  -8  116.38    5.33
   3  -4   8  126.89    6.56
  -3  -4  -8  128.25    5.33
   3   4  -8  124.89    6.02
   3  -4  -8  123.23    4.40
   3  -4  -8  123.31    5.89
   3   4   8  125.51    6.21
  -3   4  -8  126.55    5.93
   3   5  -8    8.33    1.91
  -3  -5  -8    7.30    1.61
  -3  -5  -8    9.42    1.83
  -3   5  -8    7.37    1.82
   3  -5  -8   10.94    1.49
   3  -5  -8    8.77    1.76
   3   5   8    7.38    1.77
   3   6  -8   77.53    4.86
  -3  -6  -8   82.28    4.67
  -3  -6  -8   79.32    4.74
   3   6   8   76.07    4.96
   3  -6  -8   79.59    4.14
   3  -6  -8   83.25    4.98
   3   0   9    0.86    1.17
   3   0  -9    1.73    1.33
  -3   0   9   -0.67    1.56
   3   0  -9    1.93    1.47
  -3   0  -9   -0.92    0.96
   3   1  -9    1.51    1.44
   3   1  -9   -0.92    1.18
   3  -1   9   -0.94    1.28
  -3  -1  -9   -1.58    1.18
  -3  -1   9    0.06    2.36
  -3   1  -9    1.02    1.05
  -3  -1   9    1.79    1.18
   3   1   9    2.77    1.46
   3  -1  -9    0.51    1.09
   3  -1  -9   -0.47    1.22
  -3  -2  -9   -0.06    1.09
   3   2  -9   -1.94    1.42
  -3  -2  -9   -0.28    1.08
   3   2  -9   -1.00    1.14
   3  -2   9   -0.47    1.29
  -3   2  -9    0.16    0.98
   3   2   9    1.13    1.19
  -3  -2   9    1.89    1.65
   3  -2  -9    0.17    1.54
  -3  -3  -9    0.83    1.06
   3   3  -9    2.67    1.43
   3  -3   9   -0.35    1.40
  -3  -3  -9    1.43    1.58
  -3   3  -9    2.52    1.98
   3   3   9    2.34    1.53
   3  -3  -9    2.12    1.39
  -3  -4  -9    0.08    1.16
   3  -4   9    1.40    1.65
   3   4  -9   -0.19    1.50
   3  -4  -9   -2.34    2.29
  -3   4  -9   -2.47    1.43
   3   4   9   -2.06    1.64
   3   5  -9    1.20    1.68
  -3  -5  -9    0.79    1.35
  -3   5  -9   -1.49    1.45
   3  -5  -9   -2.22    1.45
   3   5   9   -0.44    2.72
   3   0 -10   83.07    5.05
  -3   0 -10   76.72    4.38
  -3   0  10   75.22    4.80
   3   0 -10   76.44    4.83
   3   0  10   78.30    5.30
   3   1 -10   10.58    2.07
   3  -1  10   10.20    2.31
   3   1 -10   10.81    3.00
  -3  -1 -10   11.80    1.95
  -3  -1 -10    7.20    1.88
   3  -1 -10    8.40    2.05
   3   1  10    9.10    2.15
  -3   1 -10   11.93    2.00
   3   2 -10   78.67    5.02
   3  -2  10   77.14    5.33
  -3  -2 -10   75.01    4.78
   3  -2 -10   79.27    4.94
   3   2  10   70.46    5.06
  -3   2 -10   71.57    4.58
   3   3 -10   11.14    2.26
  -3  -3 -10    9.51    2.09
   3  -3  10    9.80    2.35
   3  -3 -10   11.43    2.22
  -3   3 -10   11.33    2.25
   3   3  10    9.33    2.25
  -4   0   0   12.20    1.50
   4   0   0   11.09    1.50
   4   0   0   11.38    1.07
  -4   0   0   13.46    1.38
   4   1   0  777.84   16.32
   4  -1   0  766.23   17.69
  -4   1   0  775.67   17.79
   4  -1   0  761.02   16.87
   4   1   0  762.73   17.72
  -4   1   0  775.66   16.60
  -4  -1   0  769.95   17.82
  -4   1   0  776.82   17.31
  -4  -2   0   10.33    1.19
   4  -2   0    8.31    1.11
  -4   2   0    9.41    1.14
   4   2   0    9.11    0.57
   4   2   0    8.50    1.13
  -4   2   0    9.74    1.20
   4  -2   0    8.28    1.09
  -4  -2   0    7.09    0.74
  -4   2   0    9.17    0.79
   4   2   0    9.23    0.78
  -4   3   0  429.57    9.54
   4  -3   0  432.12   10.82
   4   3   0  430.34    9.35
   4  -3   0  428.53   10.78
  -4   3   0  431.66   10.84
  -4  -3   0  433.12   10.88
   4   3   0  428.71   10.84
  -4   3   0  422.65   10.69
   4   4   0    2.93    0.45
  -4   4   0    3.14    0.83
   4   4   0    3.34    0.42
   4  -4   0    5.05    0.99
   4  -4   0    5.71    1.02
  -4   4   0    2.33    0.84
  -4   4   0    4.69    0.63
   4   4   0    4.70    0.94
  -4  -4   0    3.72    0.90
  -4  -5   0  316.91    9.18
  -4   5   0  315.11    9.15
   4  -5   0  295.49    8.95
   4   5   0  316.42    9.18
   4  -5   0  298.07    8.93
  -4  -6   0    2.69    1.00
   4   6   0    1.17    0.87
   4  -6   0    2.91    0.98
  -4   6   0    2.56    0.96
   4  -6   0    1.35    0.80
   4   7   0  215.86    7.88
  -4  -7   0  213.43    7.95
  -4   7   0  203.62    7.72
   4  -7   0  209.73    7.54
   4  -7   0  212.36    7.87
  -4  -8   0    0.09    0.95
   4  -8   0    1.78    1.13
   4  -8   0    1.18    1.16
   4   8   0   -1.00    1.07
   4   9   0   90.20    5.56
  -4   9   0   89.47    5.44
   4  -9   0   85.02    5.32
  -4  -9   0   92.13    5.64
  -4   0  -1   -0.56    0.80
   4   0  -1    1.18    0.87
   4   0   1    1.60    0.70
  -4   0  -1   -0.16    0.54
   4   0  -1    0.12    0.45
  -4   0   1    0.77    0.81
   4   0   1    0.70    0.85
  -4   0   1    0.41    0.81
   4   1  -1    1.24    0.94
  -4   1   1   -1.21    0.88
  -4  -1  -1    0.07    0.50
   4  -1   1    0.72    0.95
   4  -1   1    0.32    0.77
  -4  -1  -1   -0.10    0.79
  -4   1   1    0.23    0.69
  -4   1  -1    0.93    0.59
  -4   1  -1    0.08    0.44
   4   1   1   -0.24    0.54
   4   1   1   -0.08    0.67
  -4   1  -1    0.80    0.90
  -4  -1   1    1.53    0.98
   4  -1  -1   -0.12    0.29
   4  -1  -1    0.85    0.56
   4  -1  -1    0.56    0.65
  -4  -1   1   -0.33    0.44
   4  -2   1    2.41    0.73
   4  -2   1    2.92    0.89
  -4   2   1    2.03    0.83
  -4   2   1    4.16    0.81
  -4  -2  -1    0.80    0.63
  -4   2   1    2.66    0.38
   4   2  -1    1.88    0.73
   4   2  -1    2.34    0.37
   4  -2  -1    2.48    0.72
   4  -2  -1    2.53    0.39
  -4  -2   1    1.60    0.38
   4  -2  -1    3.09    0.75
   4   2   1    2.53    0.79
   4   2   1    2.09    0.46
  -4   2  -1    2.86    0.75
  -4   2  -1    2.72    0.64
  -4   2  -1    2.77    0.79
   4   2   1    2.75    0.56
  -4  -2   1    2.59    0.74
   4  -3   1    0.96    0.75
  -4   3   1   -0.38    0.58
  -4   3   1   -0.05    0.55
  -4  -3  -1   -1.40    0.70
   4   3  -1   -0.49    0.55
  -4   3   1   -1.65    0.79
  -4  -3  -1    0.26    0.28
   4  -3   1    0.76    0.59
   4  -3  -1   -0.60    0.59
  -4   3  -1   -0.04    0.52
   4   3   1   -0.01    0.28
   4   3   1   -1.19    0.70
   4  -3  -1    0.24    0.56
   4   3   1   -0.01    0.34
  -4  -3   1    0.74    0.60
  -4   3  -1    0.43    0.63
  -4   3  -1   -0.41    0.43
  -4  -4  -1    1.49    0.80
  -4   4   1   -1.97    0.95
   4  -4   1    1.10    0.65
   4  -4   1   -0.45    0.81
  -4   4   1    0.20    0.66
   4   4  -1    0.04    0.64
  -4   4  -1   -0.09    0.37
   4   4   1    0.49    0.69
   4  -4  -1    0.08    0.66
  -4  -4   1   -1.14    0.67
   4  -4  -1   -0.37    0.67
  -4   4  -1    0.74    0.60
   4   4   1    0.55    0.38
  -4   5   1   -0.56    0.84
  -4   5   1    0.14    0.62
   4  -5   1    0.16    0.65
   4   5  -1    0.74    0.75
   4  -5   1   -0.86    0.79
  -4  -5  -1   -0.62    0.69
   4  -5  -1    0.80    0.71
   4   5   1    0.39    0.67
  -4   5  -1    0.42    0.51
   4  -5  -1    1.03    0.74
  -4   5  -1    0.87    0.78
   4   5   1    0.94    0.47
  -4  -5   1    1.00    0.72
  -4   6   1   -0.66    0.82
   4  -6   1    1.80    0.90
  -4  -6  -1   -0.09    0.76
   4  -6   1   -0.78    0.89
   4   6  -1    0.07    0.66
   4   6   1   -0.93    0.82
  -4   6  -1    0.35    0.72
   4  -6  -1   -0.41    0.71
  -4  -6   1    0.39    0.69
   4  -6  -1    0.42    0.78
  -4   7   1    0.43    0.89
   4  -7   1    0.67    0.87
  -4  -7  -1    0.94    1.02
   4  -7   1    0.67    0.91
   4   7  -1   -0.25    0.84
   4   7   1   -0.53    0.85
  -4   7  -1   -1.01    0.88
  -4  -7   1    0.62    0.89
   4  -7  -1   -0.78    0.92
   4  -7  -1   -1.42    1.05
   4   8  -1    0.00    1.08
  -4   8   1   -1.03    1.20
   4  -8   1   -1.46    1.10
   4  -8   1   -0.99    1.13
  -4  -8  -1   -1.87    1.15
   4  -8  -1    0.24    1.12
  -4   8  -1    3.11    1.39
  -4  -8   1    2.48    1.31
   4   8   1   -0.97    1.04
  -4   9   1   -0.46    1.64
  -4  -9  -1    0.93    1.36
   4   9  -1    0.79    1.23
   4  -9   1    1.81    1.70
  -4   9  -1    1.51    1.40
   4  -9  -1   -1.14    1.45
   4   9   1   -1.90    1.46
   4  -9  -1    1.66    1.35
   4   0   2    5.28    1.16
   4   0   2    7.10    0.88
  -4   0  -2    7.10    1.26
   4   0  -2    6.30    0.88
   4   0  -2    7.59    0.79
  -4   0   2    6.53    1.33
  -4   0   2    8.87    1.31
  -4   0  -2    5.66    0.65
   4   0  -2    6.59    1.20
   4   0   2    6.48    1.08
   4   1  -2  612.95   13.03
   4  -1   2  656.26   15.40
  -4  -1  -2  616.18   13.15
   4   1  -2  611.87   13.13
  -4   1   2  588.55   14.15
   4   1  -2  628.81   15.06
  -4  -1  -2  636.28   15.17
  -4   1   2  623.21   15.56
   4  -1   2  626.24   14.58
  -4   1  -2  626.37   15.03
   4  -1  -2  586.51   14.11
   4   1   2  652.29   15.23
   4   1   2  607.96   14.04
   4  -1  -2  607.17   13.75
   4  -1  -2  605.57   13.55
  -4  -1   2  622.70   14.96
  -4   1  -2  622.16   13.40
  -4   1  -2  631.15   14.35
   4  -2   2    6.68    1.04
   4  -2   2    5.57    1.14
  -4  -2  -2    6.19    1.07
  -4   2   2    7.01    0.97
   4   2  -2    4.93    1.00
  -4   2   2    6.11    1.29
   4  -2   2    5.62    0.54
  -4  -2  -2    5.27    0.66
   4  -2  -2    5.53    0.91
   4  -2  -2    5.76    0.69
  -4  -2   2    5.90    0.52
   4   2   2    5.46    0.80
   4   2   2    5.99    1.07
  -4   2  -2    7.80    1.13
  -4   2  -2    6.15    0.85
  -4  -2   2    6.33    1.09
  -4   2  -2    5.53    0.86
   4  -2  -2    7.15    0.94
  -4  -3  -2  579.32   14.17
  -4   3   2  604.18   13.97
   4  -3   2  579.22   14.41
  -4  -3  -2  601.21   12.77
   4   3  -2  578.92   13.90
   4  -3   2  595.41   14.05
  -4   3   2  578.76   14.64
   4  -3  -2  585.94   13.91
   4  -3  -2  594.79   12.68
   4   3   2  582.28   14.18
  -4   3  -2  588.19   13.55
   4   3   2  584.43   13.23
  -4   3  -2  587.96   13.93
  -4  -3   2  564.09   13.79
   4  -3  -2  595.72   13.85
  -4   4   2    5.39    0.98
   4  -4   2    4.97    0.98
  -4  -4  -2    5.01    1.07
  -4   4   2    5.35    1.31
   4  -4   2    6.42    1.45
   4   4  -2    5.67    1.08
  -4  -4  -2    4.94    0.64
  -4   4  -2    5.62    1.06
  -4   4  -2    6.16    0.92
  -4  -4   2    6.08    1.06
   4  -4  -2    4.68    0.99
   4   4   2    4.87    0.77
   4   4   2    6.12    1.10
   4  -4  -2    7.74    1.13
  -4  -5  -2  370.83   10.46
  -4   5   2  358.56   10.53
   4  -5   2  363.83   10.07
  -4   5   2  356.64   10.17
   4  -5   2  365.98   10.45
   4   5  -2  347.33    9.90
  -4  -5  -2  361.22    8.50
   4   5   2  357.68   10.37
   4   5   2  351.27    8.96
  -4   5  -2  371.29   10.15
   4  -5  -2  359.63   10.18
  -4  -5   2  353.17    9.97
   4  -5  -2  348.26   10.08
  -4   5  -2  356.33    9.50
   4  -6   2    2.85    1.03
   4  -6   2    4.30    1.15
  -4   6   2    4.36    1.14
   4   6  -2    3.33    1.06
  -4  -6  -2    2.65    0.97
   4  -6  -2    4.82    1.19
   4   6   2    4.04    1.13
  -4  -6   2    2.37    0.97
  -4   6  -2    3.73    1.05
   4   6   2    4.31    0.83
   4  -6  -2    3.28    1.09
  -4   7   2  178.32    7.12
   4  -7   2  163.75    6.75
   4  -7   2  173.35    6.76
   4   7  -2  178.32    6.96
  -4  -7  -2  177.64    7.17
  -4  -7   2  170.36    6.84
   4   7   2  172.31    7.11
   4  -7  -2  171.20    6.97
  -4   7  -2  170.25    6.80
   4  -8   2    1.39    1.08
   4   8  -2    4.01    1.38
   4  -8   2    0.23    1.08
  -4  -8  -2    2.63    1.28
  -4   8   2    1.26    1.18
  -4   8  -2    0.38    1.09
   4  -8  -2    0.05    0.99
  -4  -8   2    2.90    1.64
   4  -8  -2    1.32    1.18
  -4  -9  -2   94.27    5.84
   4   9  -2   98.94    5.64
  -4   9   2   93.24    5.69
   4   9   2   98.17    5.93
   4  -9  -2   97.98    5.79
  -4   9  -2   95.39    5.58
   4  -9  -2   91.47    5.69
   4  -9  -2   91.02    5.15
  -4   0  -3   -1.55    0.75
   4   0   3   -0.35    0.79
  -4   0   3   -1.95    0.98
  -4   0  -3   -0.73    0.86
   4   0  -3   -1.06    0.61
   4   0  -3    0.33    0.62
  -4   0   3    0.75    0.60
   4   0  -3    0.15    0.38
   4   0   3    0.17    0.59
   4   0   3    0.21    0.34
   4   0  -3    0.26    0.46
  -4  -1  -3    0.71    0.70
   4  -1   3    0.98    0.77
   4   1  -3    0.88    0.60
  -4  -1  -3   -0.14    0.69
   4  -1   3   -1.17    0.72
   4   1  -3   -0.49    0.35
   4   1  -3   -0.76    0.63
  -4   1   3   -0.34    0.87
  -4   1   3    0.35    0.44
  -4   1   3   -0.35    0.22
   4   1  -3    0.26    0.66
   4  -1  -3   -0.21    0.49
   4   1   3    0.89    0.60
   4  -1  -3    0.90    0.53
   4   1   3   -1.12    0.71
   4  -1  -3    0.63    0.53
  -4   1  -3   -1.24    0.65
  -4   1  -3    1.00    0.76
   4  -1  -3   -0.03    0.42
  -4  -1   3   -0.37    0.65
   4  -2   3    2.24    0.76
  -4  -2  -3    1.31    0.74
  -4   2   3    0.33    0.99
   4   2  -3    0.65    0.49
  -4   2   3    1.59    0.55
   4   2  -3    1.04    0.63
  -4  -2  -3    1.20    0.48
   4  -2   3    1.46    0.94
   4   2  -3    0.87    0.73
   4   2  -3    0.87    0.35
   4  -2  -3    0.57    0.45
  -4  -2   3    1.90    0.82
  -4   2  -3    2.20    0.77
   4  -2  -3    0.41    0.53
   4  -2  -3    1.30    0.63
   4   2   3    0.70    0.52
  -4   2  -3    0.48    0.62
   4   2   3    2.62    0.80
   4  -2  -3    1.09    0.50
  -4  -3  -3    0.68    0.41
   4  -3   3    0.59    0.52
   4   3  -3   -0.55    0.67
   4  -3   3   -0.84    0.96
  -4  -3  -3   -0.63    0.68
  -4  -3  -3   -0.30    0.40
   4   3  -3    0.71    0.74
  -4   3   3    0.80    0.60
  -4   3   3    0.00    0.96
  -4   3  -3   -0.12    0.61
   4  -3  -3    0.82    0.48
   4   3   3   -0.41    0.52
  -4   3  -3    0.59    0.56
  -4  -3   3   -0.19    0.56
   4  -3  -3   -0.26    0.56
   4  -3  -3   -0.47    0.61
   4   3   3   -0.15    0.58
   4  -4   3   -0.28    0.65
   4   4  -3   -0.25    0.73
   4   4  -3   -0.02    0.62
  -4  -4  -3   -0.73    0.46
   4  -4   3    0.87    1.13
  -4  -4  -3    0.06    0.68
  -4   4   3    0.15    1.00
  -4   4   3   -0.75    0.61
   4  -4  -3    0.35    0.58
  -4   4  -3    0.60    0.64
   4  -4  -3    0.98    0.72
  -4  -4   3    0.53    0.65
   4   4   3    0.40    0.68
   4   4   3    0.15    0.57
  -4   4  -3   -0.42    0.68
   4  -5   3   -0.84    1.19
  -4  -5  -3   -0.05    0.42
  -4   5   3    0.64    0.71
   4   5  -3    0.59    0.72
  -4   5   3    1.41    1.00
  -4  -5  -3   -0.39    0.73
   4  -5   3    0.65    0.68
  -4   5  -3    0.40    0.60
  -4   5  -3    1.02    0.64
   4   5   3   -0.54    0.68
   4  -5  -3    0.52    0.74
   4   5   3   -0.91    0.64
  -4  -5   3   -0.39    0.67
   4  -5  -3   -0.30    0.64
  -4  -6  -3    3.07    1.07
   4   6  -3    0.57    0.85
  -4   6   3    0.90    1.04
  -4   6   3    0.46    0.76
   4  -6   3   -0.16    0.84
   4   6  -3   -0.82    0.96
   4  -6   3    1.67    1.08
  -4  -6  -3    0.72    0.60
  -4  -6   3   -0.16    0.78
   4  -6  -3    0.59    0.83
  -4   6  -3    1.42    0.84
   4  -6  -3    1.40    0.87
  -4   6  -3    0.26    0.81
   4   6   3    1.19    0.76
   4   6   3   -0.61    0.81
  -4  -7  -3    1.62    1.08
  -4   7   3    2.06    1.09
   4  -7   3    1.02    1.00
   4   7  -3    0.07    1.02
   4  -7   3   -0.20    1.04
   4   7  -3   -1.25    1.04
   4  -7  -3   -0.40    1.01
  -4   7  -3   -0.18    0.88
   4   7   3   -1.32    1.05
   4  -7  -3   -0.92    0.96
   4   8  -3    1.55    1.42
  -4  -8  -3    1.08    1.30
  -4   8   3    0.60    1.18
   4   8  -3    1.15    1.11
   4   8   3    1.02    1.31
   4  -8  -3    2.57    1.39
  -4   8  -3    1.13    1.22
   4  -8  -3    1.87    1.27
  -4  -9  -3    0.06    1.21
   4   9  -3   -1.02    1.56
  -4   9   3    1.86    1.49
   4  -9  -3   -0.87    1.41
   4  -9  -3    0.57    1.34
   4   9   3    2.92    1.54
  -4   9  -3    2.29    1.54
   4  -9  -3   -0.17    1.33
   4   0   4    7.06    1.29
   4   0  -4    7.45    0.81
   4   0  -4    7.91    0.91
  -4   0  -4    6.34    1.08
   4   0   4    5.94    1.13
   4   0  -4    6.30    1.00
   4   0  -4    7.10    1.10
  -4   0   4    6.74    1.47
  -4   0   4    7.43    0.83
  -4   0  -4    6.83    1.23
  -4   1   4  472.51   11.30
  -4  -1  -4  474.67   12.18
  -4   1   4  458.93   10.79
   4  -1   4  476.99   12.14
  -4  -1  -4  484.32   12.59
   4   1  -4  476.99   11.84
   4  -1   4  478.08   12.34
  -4   1   4  470.73   13.43
   4   1  -4  460.57   10.78
   4   1  -4  511.62   11.54
  -4  -1  -4  450.32   11.43
  -4   1  -4  494.21   12.17
  -4   1  -4  470.33   12.05
   4  -1  -4  471.77   10.82
   4  -1  -4  418.94   13.10
  -4  -1   4  505.99   11.56
   4   1   4  489.95   12.68
   4  -1  -4  447.71   11.50
   4  -1  -4  475.67   11.30
   4   1   4  448.05   11.78
  -4  -2  -4    4.35    0.82
   4  -2   4    5.13    1.29
  -4  -2  -4    5.68    1.20
   4   2  -4    5.62    0.75
   4  -2   4    3.50    0.82
   4   2  -4    4.79    0.98
   4   2  -4    4.40    0.67
  -4   2   4    4.65    0.78
   4   2  -4    4.14    0.93
  -4  -2  -4    5.84    1.10
  -4   2   4    6.61    1.56
   4  -2  -4    5.74    0.82
  -4   2  -4    4.38    0.88
  -4   2  -4    4.76    1.01
   4  -2  -4    6.14    1.02
   4   2   4    5.94    1.11
  -4  -2   4    5.42    1.03
   4  -2  -4    5.16    0.88
   4   2   4    5.44    1.02
  -4  -3  -4  309.51    8.93
   4   3  -4  308.41    8.93
  -4  -3  -4  305.81    8.23
   4  -3   4  308.64    9.64
  -4   3   4  309.87    8.33
  -4   3   4  318.88    9.88
   4  -3   4  300.88    8.33
   4   3  -4  311.51    8.50
  -4  -3   4  321.35    8.66
   4  -3  -4  315.61    8.69
   4   3   4  316.01    8.73
  -4   3  -4  311.69    8.87
   4   3   4  312.01    9.08
   4  -3  -4  301.71    8.30
   4  -3  -4  293.22    8.15
  -4   3  -4  308.44    8.31
   4   4  -4    3.17    0.91
  -4  -4  -4    3.88    1.06
  -4  -4  -4    2.81    0.73
   4   4  -4    2.95    1.04
  -4   4   4    3.23    0.84
   4  -4   4    3.82    1.51
  -4   4   4    3.41    1.20
   4  -4   4    2.32    0.74
  -4   4  -4    4.73    1.10
  -4  -4   4    4.08    0.94
   4  -4  -4    3.57    0.90
   4  -4  -4    4.46    1.02
   4   4   4    4.49    1.02
   4   4   4    1.82    0.83
  -4  -5  -4  227.30    6.69
   4   5  -4  226.08    7.09
  -4  -5  -4  215.09    7.64
  -4   5   4  219.44    7.38
  -4   5   4  225.51    8.06
   4   5  -4  223.04    7.68
   4  -5   4  223.10    8.30
   4  -5   4  227.18    7.21
   4  -5  -4  231.41    7.43
   4   5   4  224.28    7.14
  -4   5  -4  233.44    7.16
  -4   5  -4  222.78    7.44
   4   5   4  217.18    7.74
   4  -5  -4  220.57    7.43
  -4  -6  -4    1.46    1.05
  -4  -6  -4    2.46    0.86
   4  -6   4    2.99    1.44
   4   6  -4    3.16    1.12
  -4   6   4    1.28    0.92
   4   6  -4    4.01    1.36
  -4   6   4    0.73    1.13
   4   6   4    2.11    0.97
  -4   6  -4    0.13    0.89
  -4   6  -4    1.57    1.00
   4  -6  -4    2.84    1.09
   4   6   4    1.69    1.04
   4  -6  -4    0.81    0.92
   4   7  -4  151.38    6.51
   4   7  -4  151.65    6.21
  -4   7   4  151.19    6.57
  -4  -7  -4  154.33    6.80
   4  -7   4  148.57    6.69
   4  -7  -4  155.61    6.59
   4  -7  -4  143.33    6.35
   4   7   4  149.90    6.73
  -4   7  -4  146.36    6.15
   4   8  -4    2.10    1.51
  -4   8   4    0.92    2.73
   4   8  -4    2.88    2.24
  -4  -8  -4   -1.27    1.36
   4  -8  -4   -0.23    1.21
   4   8   4    0.95    2.15
  -4   8  -4    0.67    1.11
   4  -8  -4    1.57    1.31
  -4   0  -5    0.02    0.66
   4   0   5   -0.03    0.74
   4   0  -5    0.33    0.73
  -4   0  -5    0.22    0.77
   4   0   5    0.80    0.78
   4   0  -5    0.06    0.30
  -4   0   5    0.43    1.02
  -4   0   5    0.19    0.37
   4   0  -5    0.08    0.47
   4   1  -5    0.31    0.64
  -4   1   5    0.16    0.40
   4   1  -5   -0.43    0.37
   4   1  -5   -0.77    0.58
  -4   1   5    0.33    1.06
   4  -1   5   -0.35    0.58
  -4  -1  -5    0.25    0.92
  -4  -1  -5   -0.36    0.62
   4  -1   5   -1.49    0.92
  -4  -1  -5   -0.85    0.79
  -4   1  -5    0.53    0.63
   4   1   5   -0.34    0.67
  -4   1  -5   -0.30    0.78
   4  -1  -5    0.84    0.61
   4  -1  -5    0.57    0.67
   4  -1  -5    0.23    0.37
  -4  -1   5   -0.99    0.53
   4   1   5    0.41    0.81
   4  -2   5   -0.14    0.88
  -4   2   5    1.13    1.35
   4   2  -5    0.47    0.59
   4   2  -5   -0.24    0.56
  -4  -2  -5    1.74    0.96
  -4  -2  -5    0.44    0.77
   4  -2   5   -0.33    0.53
  -4  -2  -5    0.62    0.69
   4   2  -5    1.12    0.80
  -4   2   5    0.11    0.44
  -4   2  -5    2.81    0.94
   4   2   5    0.37    0.75
  -4   2  -5    1.39    0.60
   4   2   5    1.18    0.80
   4  -2  -5    1.21    0.78
   4  -2  -5   -0.38    0.65
   4  -2  -5    0.33    0.43
  -4   3   5    0.74    0.58
  -4  -3  -5    2.31    1.04
  -4  -3  -5    0.35    0.81
   4   3  -5   -1.43    0.80
   4   3  -5   -0.81    0.75
   4  -3   5    2.51    1.32
  -4   3   5   -1.14    1.07
   4  -3   5    0.03    0.48
  -4  -3  -5    0.46    0.62
  -4   3  -5   -0.79    0.60
   4  -3  -5   -0.14    0.63
   4   3   5   -0.44    0.72
   4  -3  -5   -0.94    0.60
  -4   3  -5   -0.87    0.88
   4  -3  -5    0.05    0.73
   4   3   5   -0.35    0.91
  -4   4   5   -0.44    0.64
   4  -4   5    1.46    1.41
   4   4  -5    0.18    0.72
  -4  -4  -5    0.71    0.66
  -4  -4  -5    0.12    0.71
   4   4  -5    0.04    0.72
  -4  -4  -5   -1.88    1.19
  -4   4   5    1.63    1.02
  -4   4  -5    1.13    0.65
   4   4   5    0.84    0.84
   4  -4  -5   -0.07    0.57
   4  -4  -5   -2.02    0.95
   4   4   5    0.85    0.80
  -4   4  -5   -2.23    0.94
   4  -5   5    1.38    1.35
   4   5  -5   -0.47    0.89
  -4   5   5    0.61    1.02
  -4  -5  -5    0.00    0.57
   4   5  -5    1.80    0.88
  -4   5   5    0.31    0.84
  -4  -5  -5    0.93    1.01
   4  -5  -5    0.11    0.71
  -4   5  -5   -0.43    0.67
   4   5   5   -1.05    0.93
   4   5   5    0.22    0.91
  -4   5  -5   -0.98    0.94
   4  -5  -5    0.18    0.79
  -4  -6  -5    1.37    0.82
   4   6  -5    1.33    1.04
   4   6  -5   -1.80    1.04
  -4   6   5   -0.16    0.99
  -4  -6  -5    1.39    1.13
  -4   6   5   -2.75    1.17
   4  -6   5    0.90    1.39
   4   6   5    0.54    1.05
   4  -6  -5    1.00    0.97
  -4   6  -5    0.19    1.04
  -4   6  -5   -0.58    0.83
   4   6   5    0.17    0.88
   4  -6  -5    1.24    0.94
   4   7  -5    1.11    1.28
   4   7  -5   -1.71    1.37
  -4  -7  -5    0.31    1.24
   4   7   5   -1.06    1.24
  -4   7  -5   -0.77    0.98
   4  -7  -5    0.68    1.19
   4  -7  -5    1.39    1.18
   4   7   5    0.82    1.26
  -4  -8  -5    0.26    2.20
   4   8  -5    1.15    2.18
   4   8  -5   -0.92    2.54
   4  -8  -5   -1.02    1.70
  -4   8  -5   -0.80    1.88
   4   8   5   -1.73    2.19
   4  -8  -5   -2.84    2.72
   4   0  -6    4.42    1.10
   4   0  -6    3.80    0.96
  -4   0   6    3.86    1.55
   4   0   6    3.54    1.14
  -4   0  -6    3.73    1.05
   4   0  -6    3.25    0.44
  -4   0  -6    5.91    1.16
   4   1  -6  301.07    8.33
  -4   1   6  277.23   10.10
   4  -1   6  296.94    9.43
   4   1  -6  296.95    9.05
  -4  -1  -6  300.01    9.02
  -4  -1  -6  285.79    8.69
  -4  -1  -6  281.81    8.77
   4  -1  -6  299.03    8.58
  -4   1  -6  304.75    9.08
  -4   1  -6  294.58    7.87
   4  -1  -6  293.36    6.96
  -4  -1   6  300.77   10.37
   4   1   6  294.40    9.17
   4  -1  -6  286.74    8.88
   4   2  -6    2.88    0.89
  -4  -2  -6    2.37    0.95
  -4  -2  -6    3.37    1.21
   4   2  -6    2.36    1.02
  -4  -2  -6    1.63    0.96
   4  -2   6    6.05    1.45
   4   2   6    2.24    0.93
   4  -2  -6    3.36    1.06
  -4   2  -6    3.08    0.71
  -4   2  -6    6.66    1.32
   4  -2  -6    3.51    0.68
   4  -2  -6    5.82    1.13
   4   3  -6  270.34    8.80
  -4   3   6  268.93    9.52
  -4  -3  -6  264.12    8.57
  -4  -3  -6  273.07    8.62
   4  -3   6  268.34    9.38
   4   3  -6  272.28    6.99
  -4  -3  -6  275.39    8.28
   4   3   6  273.49    8.86
  -4   3  -6  268.90    7.31
   4  -3  -6  275.02    7.42
   4  -3  -6  272.16    8.60
   4  -3  -6  276.74    8.54
  -4   3  -6  281.06    8.84
  -4   4   6    3.51    1.31
   4   4  -6    4.71    1.09
  -4  -4  -6    2.45    1.20
  -4  -4  -6    1.83    1.02
   4   4  -6    1.08    0.98
  -4  -4  -6    2.15    0.83
   4  -4   6    5.94    1.67
  -4   4  -6    2.99    1.18
   4  -4  -6    3.18    0.89
   4  -4  -6    4.63    1.23
   4   4   6    4.18    1.20
  -4   4  -6    2.62    0.75
  -4   5   6  184.51    7.41
  -4  -5  -6  182.83    7.03
   4   5  -6  179.90    6.19
  -4  -5  -6  183.56    7.21
   4   5  -6  179.71    7.16
   4  -5   6  179.97    7.86
  -4  -5  -6  187.04    6.54
  -4   5  -6  178.77    5.95
   4  -5  -6  185.01    6.46
   4   5   6  188.39    7.18
   4  -5  -6  180.11    7.06
  -4   5  -6  183.43    7.23
   4  -6   6   -0.26    1.50
  -4  -6  -6   -1.18    1.25
   4   6  -6    1.94    1.28
   4   6  -6    3.38    1.27
  -4   6   6   -0.08    1.20
  -4  -6  -6    2.10    1.44
  -4  -6  -6    0.70    0.83
   4  -6  -6    1.20    1.05
  -4   6  -6    2.23    0.99
  -4   6  -6    2.03    1.22
   4  -6  -6    0.83    1.23
   4   6   6    2.37    1.17
   4   7  -6  100.65    5.51
   4   7  -6  101.84    4.97
  -4  -7  -6  100.03    5.70
   4   7   6  100.68    5.27
  -4   7  -6   99.41    4.76
   4  -7  -6  103.24    5.52
   4  -7  -6   95.68    5.06
   4   0  -7   -1.04    0.88
   4   0   7   -0.93    1.01
  -4   0  -7   -0.23    0.67
  -4   0  -7   -1.62    1.07
   4   0  -7   -0.26    0.77
   4   1  -7   -0.21    0.79
   4  -1   7   -0.43    0.94
  -4  -1  -7   -0.19    0.86
  -4   1   7   -1.44    1.37
  -4  -1  -7    1.18    0.85
   4   1  -7    0.39    0.82
  -4  -1  -7   -0.20    0.88
  -4  -1   7   -0.30    1.23
   4   1   7   -0.39    0.87
  -4   1  -7   -1.34    1.02
  -4   1  -7    1.06    0.55
   4  -1  -7    0.09    0.79
   4   2  -7   -0.67    0.90
  -4  -2  -7   -0.05    0.68
  -4  -2  -7    0.21    1.01
  -4  -2  -7   -0.34    0.89
  -4   2   7    0.16    1.24
   4   2  -7    0.38    0.90
   4  -2   7   -0.73    1.02
   4  -2  -7    0.89    0.53
   4   2   7   -0.43    0.98
  -4   2  -7    0.86    0.49
  -4   2  -7   -0.98    0.94
   4  -2  -7    0.04    0.86
   4  -2  -7    1.77    1.04
  -4   3   7   -2.01    1.31
  -4  -3  -7    2.22    1.13
   4   3  -7    1.14    1.05
  -4  -3  -7   -0.91    0.87
   4   3   7    0.08    0.88
  -4   3  -7   -0.23    0.94
  -4   3  -7    0.46    0.71
   4  -3  -7    0.23    0.56
   4  -3  -7    0.63    0.91
   4  -4   7   -1.82    1.36
  -4   4   7    1.52    1.23
  -4  -4  -7   -0.74    0.86
  -4  -4  -7   -1.53    1.21
  -4  -4  -7    0.58    1.12
   4   4  -7    0.91    1.12
   4  -4  -7    0.98    1.00
  -4   4  -7    0.03    0.59
  -4   4  -7   -1.01    1.07
   4   4   7    0.75    1.06
   4  -4  -7    1.04    0.77
  -4   5   7    1.62    1.29
  -4  -5  -7    0.33    1.32
  -4  -5  -7   -1.45    1.10
   4  -5   7   -0.35    1.49
   4   5  -7   -0.11    1.09
  -4  -5  -7   -0.11    1.06
   4  -5  -7    0.95    1.07
   4   5   7   -1.54    1.19
   4  -5  -7    0.92    0.89
  -4   5  -7    0.24    0.88
  -4   5  -7   -0.58    1.11
   4   6  -7    0.49    1.40
  -4  -6  -7    1.36    1.01
  -4  -6  -7    3.10    2.35
  -4   6  -7   -0.35    1.19
   4  -6  -7    2.38    1.39
   4   6   7   -0.08    1.27
   4  -6  -7    1.68    1.20
  -4  -7  -7   -0.69    2.20
   4   7  -7    1.19    2.42
   4   7   7    2.43    1.98
   4  -7  -7    1.87    1.45
   4  -7  -7    1.57    1.44
  -4   0  -8    2.98    1.30
  -4   0   8    1.02    1.42
   4   0  -8    2.26    1.15
   4   0  -8    2.70    1.16
   4   0   8    2.41    1.17
   4  -1   8  167.80    7.30
  -4  -1  -8  159.27    5.45
  -4   1   8  157.92    7.62
  -4  -1  -8  156.93    6.41
  -4  -1  -8  165.12    6.68
   4   1  -8  169.60    6.42
   4   1  -8  160.87    6.76
  -4   1  -8  168.86    6.66
   4  -1  -8  156.54    6.75
   4   1   8  172.92    7.27
  -4  -1   8  164.52    7.96
   4  -1  -8  164.74    6.48
  -4  -2  -8    1.43    1.05
   4   2  -8    1.51    1.23
  -4  -2  -8    4.83    1.35
   4   2  -8   -0.12    0.99
   4  -2   8   -0.10    1.10
  -4   2   8    5.29    1.83
  -4  -2  -8    3.40    1.43
  -4   2  -8    3.97    1.33
   4   2   8    1.01    1.13
   4  -2  -8    2.73    1.20
  -4  -3  -8  119.77    5.73
   4   3  -8  127.39    6.26
   4  -3   8  126.02    6.52
  -4   3   8  126.56    6.27
  -4  -3  -8  132.73    5.94
  -4  -3  -8  122.51    5.54
   4  -3  -8  120.24    5.77
   4   3   8  136.96    6.45
  -4   3  -8  134.63    6.12
   4   4  -8    4.07    1.51
   4  -4   8    1.58    1.60
  -4  -4  -8   -0.62    1.26
  -4  -4  -8    4.01    1.28
  -4  -4  -8    0.82    1.15
  -4   4   8    2.33    1.93
   4   4   8    1.34    1.32
  -4   4  -8    1.19    1.22
   4  -4  -8    2.65    1.41
   4  -4  -8    0.07    0.86
  -4  -5  -8   91.14    4.90
   4  -5   8   80.01    5.51
   4   5  -8   95.47    5.36
  -4  -5  -8   94.10    5.25
  -4   5  -8   95.24    5.40
   4  -5  -8   93.51    4.20
   4  -5  -8   89.15    5.16
   4   5   8   97.62    5.60
  -4  -6  -8    2.03    2.31
   4   6  -8    2.73    1.93
  -4  -6  -8   -0.51    1.17
   4  -6  -8    0.86    1.67
  -4   6  -8   -1.10    2.17
   4  -6  -8    2.33    1.39
   4   6   8    1.53    1.88
  -4   0  -9   -2.06    1.25
   4   0  -9    0.04    1.12
   4   0  -9    0.15    1.06
   4   0   9    2.36    1.55
  -4   0   9    2.45    1.81
   4  -1   9   -2.99    1.54
   4   1  -9   -1.10    1.29
  -4   1   9   -0.94    2.03
   4   1  -9   -0.98    1.29
  -4  -1  -9   -1.70    1.23
   4  -1  -9    0.79    1.23
  -4   1  -9    1.89    1.27
   4  -1  -9   -0.15    1.27
  -4  -1   9   -2.20    1.74
   4   1   9    1.39    1.39
  -4  -2  -9    1.61    1.30
   4  -2   9    1.64    1.49
  -4  -2  -9    2.85    1.26
   4   2  -9    0.31    1.24
   4   2   9    0.74    1.26
  -4  -2   9   -0.08    1.63
   4  -2  -9    0.35    1.21
  -4   2  -9   -0.81    1.52
   4  -3   9    0.99    1.44
  -4  -3  -9    0.24    1.12
  -4  -3  -9   -1.54    1.39
   4   3  -9   -2.02    1.32
  -4   3  -9   -1.14    1.33
   4  -3  -9   -0.43    1.80
   4  -4   9   -1.76    2.23
   4   4  -9   -1.17    2.43
  -4  -4  -9    0.22    1.64
   4   4   9    1.66    1.43
  -4   4  -9   -1.13    1.55
   4  -4  -9   -1.36    1.28
   4   0  10    1.05    1.95
   4   0 -10    3.22    1.92
  -4   0 -10    5.51    1.75
   4  -1  10   87.67    5.87
   4   1 -10   86.08    5.39
  -4  -1 -10   96.73    5.15
  -4   1 -10   91.76    5.07
   4  -1 -10   85.06    5.46
   4  -1 -10   91.11    5.33
   4   1  10   89.31    5.75
   4   2 -10    3.47    1.63
  -4  -2 -10    0.09    1.76
   4  -2  10   -1.96    2.30
   4   2  10    5.28    2.01
   4  -2 -10    0.56    1.62
  -4   2 -10    0.66    1.65
  -4  -2  10    2.26    2.67
   4   3 -10   75.14    5.12
  -4  -3 -10   77.41    4.99
   4  -3  10   78.26    5.69
  -4   3 -10   78.29    4.98
   4  -3 -10   79.31    5.14
  -4  -3  10   72.36    5.82
   4   3  10   77.85    5.45
   5   0   0  446.98   10.73
  -5   0   0  454.41   12.26
  -5   0   0  466.43   11.56
   5   0   0  448.74   12.22
   5  -1   0  167.89    6.18
   5   1   0  161.88    6.07
  -5   1   0  153.26    4.98
  -5  -1   0  162.27    6.04
  -5  -1   0  158.36    5.41
   5   1   0  154.32    4.62
   5  -1   0  162.78    5.09
  -5   1   0  157.26    5.57
  -5   1   0  168.85    6.21
   5  -2   0  469.67   11.77
  -5   2   0  464.58   10.82
   5   2   0  472.49   12.28
  -5   2   0  475.69   11.92
   5  -2   0  466.28   12.17
   5  -2   0  459.85    9.98
  -5   2   0  469.02   12.21
  -5  -2   0  475.85   12.34
   5   2   0  476.99   10.62
  -5  -3   0   94.38    4.13
   5   3   0   94.54    2.97
  -5   3   0   98.44    4.18
  -5   3   0   93.95    4.12
   5  -3   0   97.08    4.16
   5  -3   0  101.76    4.20
   5   3   0   94.77    4.11
  -5   3   0   95.27    3.15
  -5  -4   0  348.64    9.89
   5  -4   0  321.12    9.71
   5  -4   0  357.62    9.82
  -5   4   0  347.45   10.01
   5   4   0  329.40    8.00
   5   4   0  345.02    9.81
  -5   4   0  345.02    8.22
  -5   4   0  338.67    9.85
   5  -5   0   73.38    3.85
   5   5   0   72.67    3.89
  -5   5   0   67.83    3.75
   5  -5   0   67.16    3.76
  -5  -5   0   68.78    3.83
   5  -6   0  166.25    6.70
  -5  -6   0  172.15    6.79
  -5   6   0  166.59    6.72
   5   6   0  170.31    6.73
   5  -6   0  166.91    6.55
   5  -7   0   46.22    3.54
   5  -7   0   43.77    3.30
  -5  -7   0   49.08    3.66
  -5   7   0   48.49    3.61
   5   7   0   47.04    3.62
   5  -8   0   95.53    5.47
  -5  -8   0  102.09    5.75
  -5   8   0   91.21    5.37
   5  -8   0   97.51    5.24
   5   8   0   94.38    5.57
  -5  -9   0   18.04    2.75
   5  -9   0   17.79    2.82
   5   9   0   23.30    2.97
  -5   9   0   16.56    2.72
   5   0   1    0.62    0.75
  -5   0   1   -0.45    0.83
   5   0   1    1.04    1.02
  -5   0   1    1.20    0.80
  -5   0  -1    1.00    1.00
   5   0  -1    1.43    0.99
   5  -1   1    1.44    0.90
  -5  -1  -1    0.77    0.60
  -5   1   1   -0.94    0.88
   5  -1   1    0.84    0.96
   5   1  -1   -0.42    0.81
  -5   1   1    0.08    0.75
  -5  -1  -1    1.07    0.99
   5   1  -1    0.52    0.42
   5   1   1    0.61    1.05
   5  -1  -1   -0.08    0.78
  -5   1  -1    0.48    0.83
   5   1   1    0.84    0.57
  -5  -1   1   -0.22    0.66
  -5  -1   1    0.49    0.78
   5  -1  -1   -0.29    0.36
  -5   1  -1    0.48    0.61
  -5   1  -1    0.77    0.58
   5  -1  -1    0.14    0.52
   5   2  -1    1.66    0.41
   5  -2   1   -0.05    0.74
   5   2  -1    1.34    0.84
  -5   2   1    0.48    0.63
  -5   2   1    1.74    0.44
   5  -2   1   -0.72    0.86
  -5  -2  -1    2.25    0.95
  -5   2   1    2.27    0.97
  -5  -2   1    0.64    0.70
   5  -2  -1    1.35    0.38
   5  -2  -1    1.39    0.75
  -5   2  -1    2.56    0.70
   5   2   1    0.70    0.81
  -5   2  -1    0.75    0.80
  -5   2  -1    0.93    0.61
   5  -3   1   -0.45    0.74
  -5  -3  -1   -0.29    0.72
  -5   3   1   -0.21    0.68
  -5   3   1    0.46    0.28
   5  -3   1   -0.21    0.84
  -5   3   1    1.12    0.93
   5   3  -1   -0.22    0.77
   5  -3  -1   -0.49    0.68
  -5   3  -1   -0.09    0.42
  -5  -3   1   -0.15    0.71
   5   3   1    0.03    0.72
   5  -3  -1    0.66    0.77
   5   3   1   -0.36    0.47
  -5   3  -1    0.19    0.70
  -5   3  -1    0.09    0.72
  -5  -4  -1    0.55    0.72
  -5   4   1    0.68    0.71
  -5   4   1   -1.14    0.97
   5   4  -1    0.01    0.73
   5  -4   1    1.46    1.06
   5  -4   1    0.63    0.78
  -5   4  -1    0.44    0.82
   5  -4  -1    0.34    0.67
   5   4   1    0.31    0.75
  -5   4  -1    1.33    0.55
   5   4   1    0.24    0.45
   5  -4  -1    0.50    0.71
  -5  -4   1    0.90    0.79
  -5   4  -1    1.08    0.75
   5  -5   1    1.24    0.88
   5   5  -1   -1.15    0.91
  -5   5   1    0.02    0.93
  -5  -5  -1    1.42    0.95
   5  -5   1    0.29    0.76
  -5   5   1    1.20    0.82
  -5   5  -1    0.96    0.88
   5  -5  -1    0.31    0.71
  -5  -5   1   -0.01    0.75
   5   5   1   -0.17    0.49
   5  -5  -1    0.60    0.88
  -5   5  -1    0.09    0.57
   5   5   1    0.57    0.81
  -5  -6  -1    1.23    0.99
  -5   6   1    0.11    0.87
   5  -6   1    1.49    1.02
   5  -6   1    0.92    0.87
   5   6  -1    1.27    0.89
   5  -6  -1    2.40    1.07
   5  -6  -1    1.45    0.89
  -5  -6   1   -0.55    0.83
   5   6   1    0.14    0.87
  -5   7   1   -0.17    1.00
  -5  -7  -1   -1.58    1.07
   5   7  -1   -0.74    0.92
   5  -7   1   -1.16    1.11
   5  -7   1   -0.38    1.04
   5   7   1    1.04    1.02
   5  -7  -1    0.27    0.99
   5  -7  -1    1.08    0.91
  -5   7  -1   -2.63    1.30
  -5  -7   1   -1.86    1.11
   5  -8   1    1.14    1.31
  -5  -8  -1   -0.33    1.19
   5   8  -1   -0.34    1.08
  -5   8   1    0.42    1.24
   5  -8   1   -0.69    1.86
   5   8   1    0.33    1.18
   5  -8  -1   -0.34    1.19
  -5   8  -1    0.98    1.23
  -5  -8   1   -0.02    1.07
   5  -8  -1    1.93    1.28
  -5   9   1   -2.13    1.93
   5  -9   1   -1.23    1.88
  -5  -9  -1    4.50    1.77
   5   9  -1    0.68    1.80
  -5   9  -1    0.17    1.96
   5   9   1    0.53    1.29
   5  -9  -1   -1.16    1.55
  -5   0   2  426.70   11.94
   5   0  -2  427.87   10.06
   5   0   2  442.26   12.23
   5   0   2  424.83   10.97
   5   0  -2  438.61   10.50
  -5   0  -2  425.78    9.92
  -5   0  -2  440.51   11.39
   5   0  -2  445.18   11.62
  -5   0   2  431.02   11.50
  -5   0  -2  424.47   11.84
   5  -1   2  139.99    4.97
   5   1  -2  134.98    5.33
  -5  -1  -2  133.88    4.03
  -5  -1  -2  139.01    5.63
   5   1  -2  129.69    3.79
   5  -1   2  143.41    5.95
   5   1  -2  130.51    3.62
  -5   1   2  130.44    5.47
  -5   1   2  129.91    4.96
  -5  -1   2  127.43    5.18
  -5  -1   2  136.51    5.37
   5  -1  -2  135.17    5.00
   5   1   2  139.60    4.64
  -5   1  -2  131.15    4.14
   5   1   2  128.79    5.54
   5  -1  -2  136.64    4.24
  -5   1  -2  137.41    4.93
  -5   1  -2  143.13    5.69
   5  -1  -2  135.80    4.39
  -5   2   2  334.18   10.32
   5  -2   2  323.57    9.21
  -5   2   2  320.93    8.98
   5   2  -2  334.40    9.41
   5  -2   2  324.01    9.36
   5   2  -2  308.71    7.15
  -5  -2  -2  315.54    9.40
  -5  -2  -2  323.68    8.00
  -5   2  -2  327.00    9.38
  -5   2  -2  327.07    8.68
  -5  -2   2  332.92    9.50
   5   2   2  320.30    9.48
   5  -2  -2  336.10    8.69
   5  -2  -2  322.76    7.84
   5  -2  -2  318.58    8.84
  -5  -2   2  303.40    7.39
  -5   2  -2  322.36    8.37
   5   2   2  323.79    8.41
   5  -3   2  119.98    4.89
  -5  -3  -2  123.99    5.03
  -5   3   2  128.51    5.52
   5  -3   2  117.78    4.99
  -5   3   2  128.15    4.82
   5   3  -2  128.41    5.01
  -5   3  -2  124.72    4.52
   5  -3  -2  129.64    3.72
   5  -3  -2  123.78    4.72
  -5   3  -2  129.73    5.00
  -5  -3   2  129.19    4.99
   5   3   2  131.51    5.13
   5  -3  -2  124.09    4.69
   5   3   2  125.62    4.27
  -5   4   2  226.70    8.06
  -5   4   2  237.13    7.52
  -5  -4  -2  238.58    7.78
   5  -4   2  235.33    7.93
   5  -4   2  235.84    7.57
   5   4  -2  223.93    7.46
  -5  -4  -2  229.65    5.92
   5  -4  -2  234.84    7.46
  -5   4  -2  231.50    6.84
   5   4   2  227.29    6.46
  -5  -4   2  226.28    7.41
   5   4   2  225.83    7.59
  -5   4  -2  233.33    7.51
   5  -4  -2  242.90    7.46
   5   5  -2   78.48    4.00
  -5   5   2   75.85    4.02
  -5  -5  -2   74.83    4.18
   5  -5   2   79.82    4.09
   5  -5   2   83.17    4.52
  -5  -5  -2   74.81    2.64
  -5   5   2   76.42    4.39
   5  -5  -2   78.39    4.02
  -5   5  -2   75.73    3.51
  -5  -5   2   72.06    3.90
   5   5   2   74.87    3.12
  -5   5  -2   77.36    3.98
   5  -5  -2   77.91    4.03
   5   5   2   74.32    4.13
  -5  -6  -2  179.24    7.15
  -5   6   2  178.91    6.93
   5  -6   2  181.83    7.01
   5  -6   2  167.73    6.94
  -5   6   2  169.65    7.25
   5   6  -2  180.83    6.83
   5  -6  -2  180.07    6.83
  -5   6  -2  172.02    6.78
  -5   6  -2  174.11    6.17
   5   6   2  168.67    6.92
   5  -6  -2  183.21    7.09
  -5  -6   2  182.97    6.98
  -5   7   2   40.53    3.30
   5  -7   2   37.90    3.23
   5   7  -2   36.90    3.13
  -5  -7  -2   38.18    3.33
   5  -7   2   38.66    3.22
  -5   7  -2   35.60    3.08
   5  -7  -2   35.51    3.12
   5  -7  -2   33.36    2.92
  -5  -7   2   38.36    3.21
   5   7   2   37.51    3.33
  -5  -8  -2   83.64    5.35
   5   8  -2   85.54    5.11
   5  -8   2   83.78    5.09
   5  -8   2   88.02    5.08
  -5   8   2   88.35    5.29
  -5   8  -2   98.69    5.45
   5  -8  -2   84.54    5.08
   5   8   2   81.83    5.30
  -5  -9  -2   16.02    2.73
   5   9  -2   19.75    3.16
   5   9  -2   19.58    2.86
  -5   9   2   20.26    2.93
   5  -9  -2   18.24    2.54
  -5   9  -2   20.12    2.77
   5   9   2   18.79    2.85
   5  -9  -2   20.73    2.96
   5   0  -3    0.48    0.59
   5   0  -3    0.57    0.81
  -5   0  -3    0.39    0.77
  -5   0  -3    0.44    0.95
   5   0  -3    0.11    0.44
  -5   0   3    0.41    0.77
   5   0   3    0.24    0.68
   5   0  -3   -0.27    0.42
   5   0   3    1.84    1.06
  -5   0   3    0.67    1.03
  -5   1   3   -0.10    0.22
  -5   1   3    0.79    0.65
  -5  -1  -3    0.09    0.27
   5   1  -3    0.27    0.35
   5  -1   3   -0.37    0.91
   5  -1   3    0.51    0.88
  -5  -1  -3   -0.59    0.68
  -5  -1  -3   -0.21    0.89
   5   1  -3    1.13    0.82
   5   1  -3    0.67    0.59
  -5   1  -3    0.57    0.76
   5   1   3   -0.46    0.91
   5  -1  -3   -0.53    0.52
   5  -1  -3   -0.37    0.54
   5   1   3    1.28    0.74
   5  -1  -3   -0.43    0.53
   5  -1  -3    0.75    0.68
  -5  -1   3   -0.47    0.70
  -5   1  -3    0.45    0.89
  -5   1  -3    0.19    0.40
  -5   2   3    3.74    1.45
   5   2  -3    0.66    0.32
   5   2  -3    0.84    0.90
   5   2  -3    0.11    0.60
   5  -2   3    1.48    1.00
  -5   2   3   -0.19    0.55
  -5  -2  -3    0.66    0.31
  -5  -2  -3    0.20    0.77
   5  -2   3    0.11    0.61
   5  -2  -3    1.23    0.70
  -5   2  -3    0.07    0.67
  -5  -2   3    1.83    0.94
   5   2   3    0.86    0.63
   5   2   3    0.34    0.72
   5  -2  -3   -0.11    0.56
  -5   2  -3    0.71    0.76
  -5   3   3   -1.14    0.66
  -5  -3  -3    0.76    0.43
  -5  -3  -3    0.41    0.44
  -5   3   3    1.40    1.11
   5   3  -3    0.76    0.87
   5  -3   3   -1.08    0.69
   5  -3   3    1.70    1.14
   5   3  -3   -0.12    0.74
  -5  -3  -3   -0.10    0.73
   5  -3  -3    0.55    0.48
  -5  -3   3    0.15    0.80
  -5   3  -3   -0.35    0.68
   5  -3  -3    0.54    0.70
   5   3   3    1.56    0.69
  -5   3  -3    0.33    0.65
   5  -3  -3   -0.25    0.62
   5   3   3   -0.73    0.86
   5  -4   3   -1.29    1.32
  -5  -4  -3   -0.72    0.77
   5   4  -3    0.35    0.76
   5  -4   3    0.20    0.68
  -5  -4  -3   -0.30    0.45
  -5   4   3    0.11    0.63
  -5   4   3   -1.70    1.15
  -5  -4   3    0.45    0.77
   5   4   3   -0.23    0.73
  -5   4  -3    0.71    0.72
  -5   4  -3   -1.32    0.78
   5  -4  -3    0.11    0.71
   5  -4  -3   -0.04    0.60
   5   4   3    0.15    0.62
  -5  -5  -3   -0.16    0.50
   5   5  -3    1.49    0.95
  -5   5   3   -0.82    0.81
  -5   5   3   -1.45    1.15
   5  -5   3    0.53    0.81
   5  -5   3    0.83    1.22
  -5  -5  -3    0.50    0.90
  -5   5  -3   -0.78    0.87
   5  -5  -3   -0.05    0.74
   5   5   3   -0.89    0.69
   5   5   3    0.74    0.90
  -5   5  -3   -1.05    0.73
   5  -5  -3    0.33    0.74
  -5  -5   3    0.43    0.79
  -5   6   3   -1.22    1.05
   5  -6   3    1.51    1.21
   5   6  -3   -1.17    1.04
  -5  -6  -3    2.73    1.27
  -5   6   3    1.46    1.11
   5  -6   3    2.16    1.13
   5   6   3    1.86    1.14
   5  -6  -3    2.88    1.14
  -5   6  -3    0.58    0.83
   5   6   3    1.53    0.81
  -5   6  -3    0.94    0.98
  -5  -6   3    2.78    1.17
  -5   7   3    1.01    1.21
   5   7  -3    1.58    1.29
   5  -7   3   -0.16    0.94
   5  -7   3   -1.57    1.36
   5   7  -3    0.41    1.48
  -5  -7  -3    0.28    1.12
   5  -7  -3   -0.33    1.00
  -5   7  -3    0.21    0.93
   5   7   3    1.26    1.24
   5  -7  -3   -2.07    1.32
   5   8  -3    0.18    1.17
  -5   8   3    1.07    1.69
   5  -8   3   -1.45    1.42
   5   8  -3    1.41    1.65
  -5  -8  -3   -0.22    1.31
   5  -8  -3    1.65    1.32
  -5   8  -3    1.82    1.27
   5   8   3   -1.89    1.43
   5  -8  -3   -1.59    1.41
   5   0   4  327.42    9.84
  -5   0  -4  324.51    9.67
   5   0  -4  299.98    8.64
  -5   0  -4  320.72    9.40
   5   0   4  304.57    9.21
   5   0  -4  324.96    8.45
   5   0  -4  320.71    8.12
  -5   0   4  316.05   10.36
  -5   0   4  316.53    8.41
  -5   1   4  102.64    5.27
   5   1  -4  107.36    4.32
   5   1  -4  102.70    4.07
  -5   1   4   92.83    2.79
   5  -1   4   98.92    4.78
  -5  -1  -4  117.73    5.26
  -5   1   4  108.47    3.89
  -5  -1  -4  102.33    4.57
   5   1  -4  106.19    3.50
   5  -1   4  104.44    4.70
  -5  -1   4  105.41    5.19
   5   1   4  111.26    4.52
   5  -1  -4  105.74    4.11
   5   1   4  104.55    5.08
   5  -1  -4  100.90    3.86
  -5   1  -4  102.63    4.54
  -5   1  -4  106.29    4.88
  -5  -1   4  102.30    4.06
   5  -1  -4  103.00    3.75
   5  -2   4  311.09    9.12
   5   2  -4  302.64    7.52
   5   2  -4  316.35    8.98
  -5  -2  -4  317.76    9.55
   5   2  -4  314.60    9.12
   5  -2   4  306.17    9.74
  -5  -2  -4  324.75    9.49
  -5   2   4  308.27    8.41
  -5   2   4  308.22   10.62
  -5   2  -4  311.76    9.20
   5  -2  -4  320.88    8.65
   5  -2  -4  302.02    8.32
  -5   2  -4  316.42    9.13
   5   2   4  324.56    9.73
  -5  -2   4  313.01    8.96
   5  -2  -4  304.02    8.51
   5   2   4  304.42    8.91
  -5   3   4   68.30    3.30
  -5   3   4   73.03    4.49
  -5  -3  -4   69.10    3.82
   5   3  -4   71.98    3.65
   5  -3   4   73.13    4.21
   5   3  -4   70.53    3.73
  -5  -3  -4   65.77    3.04
   5  -3   4   69.87    3.47
  -5   3  -4   74.03    3.51
   5   3   4   66.66    3.86
   5  -3  -4   69.95    3.27
   5   3   4   67.92    3.43
   5  -3  -4   70.28    3.27
  -5   3  -4   70.73    3.67
   5  -3  -4   65.33    3.32
  -5  -3   4   75.31    3.76
   5   4  -4  227.54    7.92
   5  -4   4  225.72    8.30
  -5  -4  -4  243.69    6.98
   5  -4   4  231.49    7.48
   5   4  -4  235.94    7.63
  -5   4   4  233.43    8.78
  -5  -4  -4  234.78    8.09
  -5   4   4  240.01    7.52
   5  -4  -4  226.51    7.52
   5   4   4  236.84    8.24
  -5   4  -4  234.41    7.51
   5   4   4  224.47    7.35
  -5   4  -4  237.19    7.70
   5  -4  -4  247.66    7.53
   5  -5   4   50.29    3.78
   5   5  -4   56.60    3.38
  -5   5   4   50.80    3.81
  -5  -5  -4   49.77    2.63
   5  -5   4   49.22    3.10
  -5  -5  -4   49.37    3.48
   5   5  -4   48.78    3.43
  -5   5   4   48.61    3.19
  -5   5  -4   46.55    3.14
   5   5   4   54.26    3.58
   5   5   4   54.53    3.12
  -5   5  -4   46.02    3.03
   5  -5  -4   54.94    3.26
   5  -5  -4   52.64    3.28
  -5   6   4  120.47    5.57
   5   6  -4  127.50    6.00
  -5  -6  -4  130.87    6.21
  -5   6   4  123.93    6.16
   5  -6   4  130.36    6.74
   5   6  -4  118.87    5.51
   5  -6  -4  123.58    5.62
  -5   6  -4  122.73    5.49
   5   6   4  125.71    5.20
  -5   6  -4  129.87    5.55
   5   6   4  124.37    6.07
   5  -6  -4  131.85    5.74
   5   7  -4   36.96    3.09
   5   7  -4   31.90    3.12
  -5   7   4   39.35    3.34
  -5  -7  -4   35.26    3.44
   5  -7   4   37.09    3.60
   5  -7  -4   37.05    3.19
   5  -7  -4   33.64    3.06
   5   7   4   33.58    3.31
  -5   7  -4   37.23    3.11
  -5   8   4   74.73    4.98
  -5  -8  -4   70.79    5.09
   5   8  -4   68.28    4.50
   5   8  -4   72.86    4.79
   5  -8  -4   76.75    4.95
  -5   8  -4   68.62    4.49
   5  -8  -4   70.90    4.70
   5   8   4   69.35    4.98
  -5   0   5   -0.18    0.51
   5   0  -5    0.45    0.51
  -5   0  -5    1.14    0.97
  -5   0  -5    0.20    0.82
   5   0  -5    1.13    0.80
   5   0  -5   -0.22    0.55
   5   0   5    0.61    0.92
  -5   0   5    1.56    1.17
   5   0   5   -0.82    0.92
   5  -1   5    0.58    0.84
  -5   1   5   -0.91    1.26
   5   1  -5    0.54    0.58
   5  -1   5   -0.58    0.91
   5   1  -5    0.86    0.57
   5   1  -5    1.23    0.77
  -5   1   5    0.12    0.47
  -5  -1  -5    0.94    0.90
  -5  -1  -5   -0.19    0.97
   5  -1  -5    0.58    0.77
   5  -1  -5    0.91    0.63
   5  -1  -5    0.14    0.49
   5   1   5    0.76    1.00
  -5  -1   5    1.80    1.23
   5   1   5    0.38    0.86
  -5   1  -5   -0.33    0.86
  -5   1  -5   -0.22    0.71
   5   2  -5    1.71    0.65
   5   2  -5    0.62    0.76
  -5  -2  -5   -0.22    0.69
  -5  -2  -5    0.87    0.88
  -5   2   5    2.04    1.36
   5  -2   5    0.40    0.71
   5  -2   5   -2.83    1.33
  -5  -2  -5   -0.03    0.92
   5   2  -5    1.06    0.68
  -5   2   5   -0.16    0.54
   5   2   5    0.28    0.70
  -5   2  -5    0.20    0.69
   5  -2  -5    1.40    0.79
   5  -2  -5   -0.36    0.63
   5  -2  -5    0.87    0.58
  -5   2  -5    0.25    0.76
   5   2   5    1.16    1.03
   5  -3   5   -1.03    1.23
   5   3  -5   -0.71    0.85
  -5  -3  -5    0.99    1.01
  -5   3   5   -0.46    0.54
  -5   3   5    1.22    1.40
  -5  -3  -5   -1.07    1.01
  -5  -3  -5   -0.53    0.67
   5  -3   5   -1.59    0.80
   5   3  -5    0.81    0.85
   5  -3  -5   -0.30    0.52
  -5   3  -5    0.07    0.63
   5   3   5   -0.53    0.75
   5   3   5   -1.47    1.04
  -5   3  -5    0.55    0.88
   5  -3  -5   -0.02    0.67
   5  -3  -5   -0.49    0.73
  -5   4   5    0.82    1.25
   5   4  -5   -0.77    0.89
  -5  -4  -5    1.21    1.29
   5  -4   5   -0.03    1.42
  -5   4   5   -0.09    0.68
  -5  -4  -5   -2.13    1.10
   5   4  -5    2.16    1.10
  -5  -4  -5   -0.11    0.60
  -5   4  -5   -0.57    0.71
  -5   4  -5    0.33    0.81
   5  -4  -5    0.06    0.76
   5   4   5   -0.38    0.97
   5  -4  -5   -0.72    0.89
   5   4   5   -0.30    0.88
   5   5  -5   -1.22    1.00
  -5   5   5    0.10    1.11
   5  -5   5   -0.35    1.26
  -5  -5  -5    0.03    0.64
  -5  -5  -5    0.90    1.14
   5   5  -5    1.74    1.24
  -5   5   5   -0.54    0.87
  -5   5  -5    1.92    0.96
   5   5   5    2.01    1.03
   5  -5  -5    0.74    0.88
   5   5   5    1.42    1.15
  -5   5  -5    0.54    0.97
   5   6  -5    1.20    1.42
  -5  -6  -5    1.63    1.24
   5   6  -5    0.54    1.52
   5  -6   5    2.92    1.67
  -5   6   5    1.97    1.40
   5  -6  -5    0.96    1.05
  -5   6  -5    0.22    0.86
   5   6   5   -0.47    1.11
   5  -6  -5    2.27    1.23
  -5   6  -5    0.61    1.14
   5   6   5    2.45    1.19
  -5  -7  -5   -1.67    1.49
   5   7  -5    0.89    1.44
   5   7  -5    0.94    1.35
   5  -7   5   -0.24    1.54
   5  -7  -5    0.11    1.31
   5  -7  -5   -0.46    1.27
  -5   7  -5   -1.64    1.24
   5   7   5   -1.79    1.47
   5   8  -5    2.40    2.97
  -5  -8  -5    2.19    1.84
   5   8  -5    3.37    2.19
  -5   8  -5   -0.40    1.34
   5  -8  -5    1.69    1.46
   5   0  -6  195.35    5.16
   5   0  -6  181.10    6.75
   5   0   6  199.90    7.34
   5   0  -6  196.78    6.31
  -5   0   6  197.86    8.33
  -5   0  -6  196.63    7.16
  -5   0  -6  200.87    6.97
   5   1  -6   61.20    3.08
  -5  -1  -6   56.22    3.51
  -5  -1  -6   61.96    3.66
   5   1  -6   60.76    3.59
   5  -1   6   60.87    3.85
  -5   1   6   60.01    4.29
   5   1  -6   66.84    2.35
   5  -1  -6   62.61    2.52
   5  -1  -6   66.35    3.65
  -5   1  -6   61.78    3.28
  -5  -1   6   62.67    4.48
  -5   1  -6   62.21    3.72
   5   1   6   62.30    3.72
   5  -1  -6   64.87    3.34
   5   2  -6  166.05    5.58
  -5  -2  -6  166.65    6.53
   5   2  -6  165.12    4.79
  -5   2   6  165.62    7.80
   5  -2   6  170.44    7.01
  -5  -2  -6  175.29    6.96
   5   2  -6  167.42    6.59
  -5  -2  -6  165.98    6.13
   5  -2  -6  164.60    6.02
   5  -2  -6  166.62    5.16
  -5   2  -6  162.25    5.63
   5   2   6  180.08    6.76
   5  -2  -6  163.32    6.36
  -5   2  -6  173.21    6.75
  -5  -3  -6   61.68    3.86
   5  -3   6   56.72    4.06
  -5   3   6   65.08    4.72
  -5  -3  -6   60.07    3.34
  -5  -3  -6   59.18    3.78
   5   3  -6   60.61    2.80
   5   3  -6   61.62    3.71
  -5   3  -6   60.70    3.04
  -5   3  -6   58.11    3.75
   5  -3  -6   60.85    3.58
   5  -3  -6   60.85    2.95
   5   3   6   59.14    3.68
   5  -3  -6   57.46    3.47
   5   4  -6  123.03    4.89
  -5  -4  -6  133.38    5.91
   5  -4   6  127.37    6.45
  -5   4   6  129.21    6.50
  -5  -4  -6  132.55    5.97
  -5  -4  -6  128.38    5.34
   5   4  -6  131.97    5.92
  -5   4  -6  124.55    4.82
   5  -4  -6  131.18    4.97
   5  -4  -6  123.30    5.54
   5   4   6  127.57    5.77
  -5   4  -6  125.84    5.81
  -5  -5  -6   40.99    3.37
   5  -5   6   39.74    3.67
   5   5  -6   40.32    2.94
   5   5  -6   42.62    3.43
  -5  -5  -6   48.65    3.62
  -5  -5  -6   40.48    2.83
  -5   5   6   45.74    3.81
  -5   5  -6   39.41    3.33
  -5   5  -6   41.27    2.71
   5  -5  -6   41.07    2.91
   5   5   6   40.58    3.20
   5  -5  -6   44.07    3.23
  -5  -6  -6   95.39    5.25
   5  -6   6   94.96    5.84
  -5  -6  -6   91.27    4.42
  -5  -6  -6   92.94    5.41
  -5   6   6   91.95    5.57
   5   6  -6   93.60    5.35
   5   6  -6   89.93    4.62
   5  -6  -6   91.84    4.76
  -5   6  -6   93.12    4.48
   5  -6  -6   89.23    4.99
  -5   6  -6   96.71    5.40
   5   6   6   96.04    5.11
   5   7  -6   21.79    2.91
  -5  -7  -6   22.18    2.91
  -5  -7  -6   23.15    3.65
  -5   7  -6   21.02    2.31
   5  -7  -6   24.48    2.76
   5  -7  -6   19.51    2.64
  -5   0   7   -2.09    1.42
   5   0  -7    1.37    0.94
   5   0   7    2.17    1.18
  -5   0  -7    0.10    0.90
  -5   0  -7   -0.22    0.81
   5   0  -7    0.74    0.90
  -5  -1  -7   -0.19    0.88
   5   1  -7   -0.45    0.85
  -5  -1  -7    0.01    0.91
   5  -1   7    1.55    1.12
   5   1  -7   -0.97    0.90
  -5   1   7    1.17    1.27
   5  -1  -7   -0.43    0.65
   5  -1  -7    0.64    0.87
   5  -1  -7    1.36    1.00
   5   1   7    2.40    1.13
  -5  -1   7   -1.02    1.44
  -5   1  -7   -1.22    0.76
  -5   1  -7    0.64    1.07
   5  -2   7    1.17    1.19
  -5  -2  -7    2.38    1.28
  -5   2   7    0.17    1.26
  -5  -2  -7    1.74    1.16
  -5  -2  -7   -0.77    0.85
   5   2  -7    0.55    0.90
   5  -2  -7    0.38    0.98
   5  -2  -7    1.48    0.61
  -5   2  -7    1.39    0.69
   5  -2  -7   -0.22    0.93
   5   2   7    0.00    0.92
  -5   2  -7    0.72    1.07
  -5   3   7    1.62    1.57
  -5  -3  -7    0.59    0.80
   5  -3   7   -3.01    1.45
  -5  -3  -7    1.51    1.29
   5   3  -7   -0.37    1.02
  -5  -3  -7   -2.21    1.28
   5  -3  -7    0.29    0.67
   5  -3  -7   -1.61    1.15
   5  -3  -7   -1.38    1.17
   5   3   7   -1.42    1.23
  -5   3  -7   -1.36    0.77
  -5   3  -7    0.19    0.93
   5   4  -7    2.16    1.32
   5  -4   7    0.19    1.26
  -5  -4  -7    0.15    0.88
  -5   4   7    1.30    1.44
  -5  -4  -7    0.19    1.21
  -5  -4  -7    2.81    1.32
  -5   4  -7    2.16    0.83
   5  -4  -7    1.71    0.90
   5  -4  -7    0.66    1.17
   5   4   7   -0.97    1.05
  -5   4  -7    1.21    1.21
   5  -5   7   -0.52    1.57
   5   5  -7   -2.70    1.44
  -5  -5  -7    0.94    1.29
  -5  -5  -7    0.57    0.99
  -5  -5  -7    2.79    1.52
  -5   5   7    0.78    2.08
   5  -5  -7    1.21    1.01
   5  -5  -7   -1.45    1.29
  -5   5  -7    1.52    1.01
   5   5   7    0.74    1.73
  -5   5  -7    0.50    1.19
   5  -6   7   -2.28    1.67
  -5  -6  -7    1.93    2.98
  -5  -6  -7    0.74    2.65
   5   6  -7    0.52    1.57
  -5  -6  -7    0.59    1.15
  -5   6   7   -1.03    1.65
   5  -6  -7    1.60    1.41
  -5   6  -7    0.82    1.06
   5  -6  -7    0.04    1.22
   5  -6  -7    0.55    1.20
   5   6   7    1.53    1.48
  -5   6  -7   -0.66    2.33
   5   0  -8  116.59    5.68
  -5   0   8  117.61    6.64
  -5   0  -8  107.75    5.33
   5   0  -8  115.55    5.20
  -5   0  -8  111.88    4.27
   5   0   8  114.79    5.98
   5   1  -8   40.24    2.99
  -5  -1  -8   35.90    3.03
  -5  -1  -8   38.39    2.68
   5   1  -8   41.32    3.31
  -5   1   8   39.05    3.83
   5  -1   8   32.18    3.19
  -5  -1   8   38.81    4.00
   5  -1  -8   38.27    3.03
  -5   1  -8   34.29    3.02
   5   1   8   38.71    3.46
   5  -1  -8   38.14    3.25
   5  -2   8  113.03    6.13
  -5  -2  -8  111.50    5.54
   5   2  -8  116.02    5.90
  -5  -2  -8  115.73    5.25
  -5   2   8  117.17    6.85
  -5  -2   8  119.83    6.95
   5  -2  -8  114.27    5.90
   5   2   8  114.63    6.11
  -5   2  -8  114.49    5.73
   5  -2  -8  123.03    5.62
  -5  -3  -8   26.30    2.63
  -5  -3  -8   28.10    2.76
  -5  -3  -8   26.93    2.86
  -5   3   8   29.21    3.46
   5  -3   8   26.50    3.20
   5   3  -8   28.84    2.93
  -5   3  -8   28.40    2.91
   5   3   8   28.80    3.03
   5  -3  -8   29.17    2.82
   5  -4   8   84.75    5.65
   5   4  -8   82.38    5.13
  -5  -4  -8   87.94    4.95
  -5  -4  -8   91.77    4.88
  -5  -4  -8   87.12    5.20
  -5   4   8   84.89    5.58
   5  -4  -8   89.66    4.99
   5   4   8   94.14    5.43
  -5   4  -8   88.58    5.29
   5  -5   8   14.58    2.73
  -5  -5  -8   25.79    3.08
  -5  -5  -8   20.39    2.93
   5   5  -8   18.40    2.64
  -5  -5  -8   18.59    2.29
   5  -5  -8   21.68    2.23
   5  -5  -8   16.24    2.37
   5   5   8   24.01    2.87
  -5   5  -8   18.63    2.78
  -5   0  -9   -2.06    1.46
   5   0  -9   -0.97    1.31
  -5   0   9   -2.41    2.78
   5   0  -9    0.31    1.70
   5   0   9   -0.64    1.33
   5   1  -9    1.49    1.31
  -5   1   9    1.26    2.41
  -5  -1  -9   -0.82    1.80
   5  -1   9    0.77    1.37
  -5  -1   9   -2.49    2.12
   5  -1  -9   -1.92    1.46
   5  -1  -9    1.56    1.30
  -5   1  -9    1.62    1.35
   5   1   9   -1.23    1.36
  -5   2   9   -1.48    3.30
   5   2  -9    0.80    1.20
  -5  -2  -9   -0.18    1.36
   5  -2   9   -1.03    1.57
   5  -2  -9   -0.01    1.67
   5   2   9   -1.12    1.32
   5  -2  -9    1.34    1.50
  -5   2  -9   -0.46    1.16
  -5  -2   9    1.16    1.92
  -5  -3  -9   -0.84    1.47
  -5  -3  -9   -2.91    1.40
   5  -3   9   -2.17    1.82
   5   3  -9    1.35    1.27
  -5   3  -9    2.23    1.42
   5   3   9    0.88    1.63
   5  -3  -9   -0.59    1.85
  -5  -3   9   -0.85    1.71
  -5  -4  -9    0.58    2.56
   5   4  -9    1.80    1.50
  -5  -4  -9    0.75    1.75
   5  -4   9    1.83    1.84
  -5   4  -9    0.59    1.37
   5   4   9   -0.29    2.28
   5  -4  -9    1.34    1.48
   5   0 -10   52.70    4.33
  -5   0 -10   52.29    3.99
   5   0  10   50.20    4.57
   5   0 -10   53.92    4.02
   5  -1  10   19.66    3.02
  -5  -1 -10   17.22    2.54
   5   1 -10   17.87    2.69
   5   1  10   18.32    2.98
   5  -1 -10   20.75    2.79
   5  -1 -10   23.07    2.88
  -5   1 -10   18.29    2.70
  -5  -1  10   12.67    2.80
   5  -2  10   50.62    4.57
  -5  -2 -10   51.90    4.02
   5   2 -10   56.14    4.47
  -5  -2  10   39.02    4.34
   5  -2 -10   48.52    4.06
   5   2  10   55.65    4.68
  -5   2 -10   48.02    4.01
  -6   0   0  255.03    7.70
   6   0   0  259.28    8.45
   6   0   0  244.39    6.98
  -6   0   0  254.55    8.34
  -6   1   0  182.14    6.94
  -6   1   0  182.43    6.24
  -6  -1   0  180.48    6.16
  -6  -1   0  168.92    6.66
   6   1   0  167.94    5.20
   6   1   0  174.02    6.70
   6  -1   0  185.15    6.97
   6  -1   0  170.17    5.65
  -6   1   0  167.11    5.58
   6  -2   0  318.15    7.40
   6   2   0  317.89    9.80
  -6  -2   0  330.16    9.97
   6  -2   0  309.98    9.70
  -6   2   0  320.66    9.44
  -6  -2   0  305.30    8.95
  -6   2   0  310.74    9.74
   6   2   0  323.11    7.94
  -6   2   0  316.35    8.33
   6  -2   0  320.42    9.00
  -6  -3   0  103.06    4.83
  -6   3   0  104.36    3.61
   6   3   0   97.78    4.76
  -6   3   0  106.63    4.86
   6  -3   0  107.22    4.85
  -6   3   0   97.03    4.55
   6   3   0  106.60    3.40
   6  -3   0  106.70    4.59
  -6   4   0  290.63    9.19
  -6   4   0  282.67    7.33
  -6   4   0  294.04    9.23
   6  -4   0  303.19    9.21
   6   4   0  283.30    9.19
   6  -4   0  286.14    9.15
   6   4   0  265.27    6.70
  -6  -4   0  279.24    9.08
  -6  -5   0   78.82    4.32
   6  -5   0   78.26    4.28
  -6   5   0   75.15    2.95
  -6   5   0   73.99    4.26
  -6   5   0   74.25    4.26
   6   5   0   75.08    4.29
   6  -5   0   76.15    4.18
   6  -6   0  150.77    6.44
   6  -6   0  146.79    6.46
  -6   6   0  144.08    6.46
  -6  -6   0  141.41    6.48
   6   6   0  138.57    6.32
  -6   7   0   62.92    4.26
   6  -7   0   56.09    3.96
  -6  -7   0   55.15    4.22
   6   7   0   54.85    4.13
   6  -7   0   58.08    4.22
   6  -8   0   56.26    4.13
   6  -8   0   60.63    4.47
   6   8   0   58.51    4.49
  -6  -8   0   54.15    4.49
  -6   8   0   57.33    4.36
  -6   0  -1    1.61    0.97
  -6   0  -1   -0.41    0.59
  -6   0   1   -0.03    0.81
  -6   0  -1   -0.53    0.63
  -6   0   1    0.97    0.80
   6   0  -1   -0.96    0.95
   6   0  -1    0.75    0.57
   6   0   1    0.03    0.72
   6   0   1    1.33    0.92
  -6  -1  -1    0.49    0.60
   6  -1   1    0.25    0.90
   6   1  -1    1.09    0.93
  -6  -1  -1    0.20    0.93
  -6   1   1    2.01    0.94
   6   1  -1    1.16    0.53
  -6   1   1    1.50    1.10
  -6   1   1    0.24    0.52
   6  -1   1    0.32    0.79
  -6   1  -1    2.35    1.13
   6  -1  -1    1.22    0.72
  -6  -1   1    0.16    0.86
  -6   1  -1    1.43    0.79
  -6  -1   1    0.81    0.88
   6  -1  -1    2.81    1.20
   6  -1  -1    0.37    0.43
   6   1   1   -0.55    0.74
   6   1   1    0.03    0.88
  -6   1  -1    0.74    0.76
   6  -2   1    0.45    0.95
  -6  -2  -1    1.87    1.05
  -6   2   1    0.63    0.49
   6  -2   1    0.82    0.98
   6   2  -1    0.22    0.96
  -6   2   1    0.31    1.06
  -6   2   1   -0.19    0.77
  -6  -2  -1    0.59    0.66
   6   2  -1    0.99    0.48
  -6   2  -1   -0.57    0.73
  -6   2  -1    0.83    0.63
   6   2   1   -0.25    0.62
  -6   2  -1    0.53    1.08
   6  -2  -1    1.01    0.88
  -6  -2   1   -0.31    0.92
   6  -2  -1    0.08    0.37
   6   2   1    1.93    1.04
   6  -2  -1    0.04    0.72
   6   3  -1    0.00    0.81
   6  -3   1   -0.59    0.78
  -6   3   1    0.95    0.83
   6  -3   1   -0.42    0.89
  -6   3   1   -0.07    1.11
   6   3  -1    0.74    0.39
  -6  -3  -1    1.83    1.03
  -6   3   1    0.40    0.37
  -6   3  -1    0.85    0.89
   6   3   1    0.80    0.98
  -6  -3   1   -0.47    0.83
   6   3   1   -0.47    0.58
  -6   3  -1    0.06    0.50
   6  -3  -1    0.67    0.87
  -6   3  -1    1.55    0.94
   6  -3  -1   -0.19    0.83
  -6  -4  -1   -0.76    0.90
   6  -4   1   -0.47    0.89
  -6   4   1    1.27    0.84
   6  -4   1    0.55    0.76
   6   4  -1    0.40    0.84
  -6   4   1   -3.19    1.34
  -6   4   1   -0.04    0.44
   6  -4  -1   -0.02    0.80
   6   4   1    1.05    0.62
   6   4   1   -0.50    0.84
   6  -4  -1    2.04    0.95
  -6  -4   1    1.29    0.85
  -6   4  -1    1.07    0.88
  -6   4  -1    0.01    0.54
  -6   4  -1    2.16    1.02
   6  -5   1   -1.29    1.06
  -6  -5  -1   -0.88    0.91
  -6   5   1    1.46    1.24
  -6   5   1    1.54    0.94
   6  -5   1    2.06    1.01
  -6  -5   1    0.00    0.86
   6  -5  -1    0.58    0.93
  -6   5  -1    0.55    0.90
  -6   5  -1    0.97    0.67
   6   5   1    0.46    0.88
   6  -5  -1   -0.59    0.83
   6  -6   1   -1.19    1.13
   6  -6   1   -0.30    1.06
  -6  -6  -1    0.54    1.08
   6   6  -1    0.63    0.93
  -6   6   1   -1.55    1.04
   6   6   1    0.56    1.00
   6  -6  -1   -0.13    0.84
   6  -6  -1    0.63    0.89
  -6  -6   1    0.45    0.95
  -6   6  -1    0.57    1.06
  -6  -7  -1    0.23    1.16
  -6   7   1   -2.50    1.44
   6  -7   1    1.46    1.25
   6   7  -1    1.07    1.25
   6  -7   1    0.20    1.09
   6  -7  -1   -1.48    1.25
   6   7   1    0.74    1.09
   6  -7  -1   -2.48    1.27
  -6   7  -1    1.60    1.22
  -6  -7   1    0.73    1.93
   6  -8   1    2.06    1.49
  -6   8   1    1.49    1.34
  -6  -8  -1   -1.84    1.61
   6  -8   1    2.16    1.48
   6   8  -1    0.46    1.34
   6  -8  -1    4.91    1.70
   6   8   1    0.11    1.32
  -6   8  -1   -0.38    1.25
   6  -8  -1    1.06    1.31
  -6  -8   1    0.72    2.41
  -6   0   2  359.15   10.65
   6   0   2  368.13   11.21
  -6   0  -2  377.20   11.23
  -6   0  -2  386.69    9.36
  -6   0   2  387.93   11.18
  -6   0  -2  378.05   10.46
   6   0  -2  385.01    9.72
   6   0  -2  374.26    9.36
   6   0  -2  378.48   10.86
   6   0   2  372.74   10.18
   6   1  -2  147.83    4.45
   6  -1   2  156.66    5.71
   6  -1   2  154.84    6.46
  -6   1   2  156.33    6.01
  -6  -1  -2  146.28    4.61
  -6  -1  -2  155.44    6.30
  -6   1   2  152.44    6.30
   6   1  -2  152.14    5.98
   6   1   2  162.59    6.55
   6  -1  -2  149.17    4.85
  -6   1  -2  150.88    4.86
   6   1   2  154.98    5.30
  -6   1  -2  147.00    6.13
  -6  -1   2  152.62    6.12
  -6  -1   2  141.29    5.83
  -6   1  -2  146.39    5.59
   6  -1  -2  152.34    5.07
   6  -1  -2  164.00    6.00
  -6   2   2  256.37    6.12
   6  -2   2  276.99    8.97
  -6   2   2  252.03    8.95
  -6   2   2  257.71    8.17
   6  -2   2  248.09    8.07
   6   2  -2  262.52    8.64
  -6  -2  -2  252.89    6.94
  -6  -2  -2  253.99    8.77
   6   2  -2  246.30    6.32
   6  -2  -2  252.15    7.52
   6   2   2  243.95    8.62
  -6   2  -2  256.38    8.70
  -6   2  -2  260.93    7.87
   6  -2  -2  258.37    6.84
  -6  -2   2  260.80    8.63
   6   2   2  261.94    7.44
  -6   2  -2  248.81    7.24
   6  -2  -2  258.20    8.16
   6  -3   2  164.59    6.30
   6   3  -2  160.27    6.24
  -6  -3  -2  150.53    4.98
  -6   3   2  162.06    6.85
   6  -3   2  150.85    6.06
  -6  -3  -2  151.13    6.24
  -6   3   2  152.28    5.90
   6   3   2  154.27    6.30
  -6   3  -2  154.27    6.20
  -6   3  -2  161.10    5.53
  -6  -3   2  158.45    6.18
   6  -3  -2  158.27    5.71
  -6   3  -2  159.87    5.56
   6  -3  -2  149.32    5.87
   6   3   2  156.67    5.18
   6  -3  -2  160.94    4.53
   6   4  -2  135.27    5.73
  -6   4   2  138.10    6.42
  -6  -4  -2  133.20    5.83
  -6   4   2  138.09    5.68
   6  -4   2  132.70    5.73
   6  -4   2  143.06    5.99
  -6   4  -2  137.76    5.03
  -6  -4   2  134.28    5.70
   6   4   2  136.17    4.72
   6  -4  -2  136.30    5.61
   6  -4  -2  139.17    5.53
  -6   4  -2  131.98    5.66
   6   4   2  137.26    5.96
  -6   5   2  103.47    4.89
  -6  -5  -2   98.24    5.01
   6   5  -2   94.55    4.76
   6  -5   2   92.77    4.86
  -6   5   2   94.52    5.27
   6  -5   2   96.15    5.01
   6   5   2   92.59    3.66
  -6   5  -2   87.28    4.03
  -6  -5   2   95.44    4.80
   6  -5  -2   94.09    4.74
   6  -5  -2   90.42    4.63
   6   5   2   98.72    5.12
  -6   5  -2   96.70    4.89
   6  -6   2  123.36    6.13
   6   6  -2  115.88    5.67
  -6   6   2  113.97    6.06
  -6  -6  -2  120.74    6.03
   6  -6   2  120.93    5.77
  -6   6   2  111.75    5.67
  -6   6  -2  117.07    5.71
  -6   6  -2  116.11    4.91
  -6  -6   2  111.37    5.53
   6  -6  -2  114.17    5.50
   6  -6  -2  115.87    5.68
   6   6   2  121.22    5.94
  -6   7   2   40.33    3.54
   6  -7   2   40.59    3.63
   6   7  -2   43.10    3.53
  -6  -7  -2   44.75    3.91
   6  -7   2   44.91    3.73
   6   7   2   46.13    3.88
   6  -7  -2   43.76    3.48
  -6  -7   2   43.78    3.56
  -6   7  -2   43.17    3.65
   6  -7  -2   40.96    3.53
   6  -8   2   75.13    5.06
   6  -8   2   76.44    5.11
   6   8  -2   77.35    5.01
  -6   8   2   76.77    5.12
  -6  -8  -2   75.82    5.37
   6  -8  -2   76.10    5.05
   6   8   2   75.64    5.22
  -6   8  -2   85.91    5.32
   6   0  -3   -0.34    0.44
   6   0  -3   -1.22    0.68
  -6   0  -3   -2.43    1.06
  -6   0   3   -0.41    1.07
  -6   0  -3    0.61    0.46
  -6   0   3   -0.80    0.91
   6   0   3    0.56    0.87
   6   0  -3   -0.92    0.90
   6   0   3    0.11    0.96
   6   0  -3   -0.50    0.48
  -6   0  -3    0.90    1.03
  -6   1   3    0.05    1.01
   6  -1   3    1.60    1.12
  -6   1   3    0.79    0.82
   6   1  -3   -0.08    0.46
   6   1  -3   -0.71    0.79
   6  -1   3   -1.05    1.06
  -6  -1  -3    1.22    0.80
   6   1  -3    1.23    1.00
  -6  -1  -3    0.70    0.42
  -6  -1  -3    0.83    0.95
   6  -1  -3    2.39    0.98
   6   1   3    0.41    0.87
  -6  -1   3   -0.39    0.93
   6  -1  -3    0.84    0.59
  -6   1  -3    0.39    0.50
  -6  -1   3    0.82    0.87
   6   1   3    1.13    0.80
  -6   1  -3   -0.34    0.86
  -6   1  -3   -1.28    1.05
   6  -1  -3    1.00    0.61
  -6  -2  -3    0.81    1.06
  -6  -2  -3    1.12    0.43
  -6   2   3   -0.27    0.75
   6  -2   3   -0.02    0.84
  -6   2   3    1.69    1.31
   6   2  -3   -0.60    0.77
   6   2  -3   -1.58    1.03
   6  -2   3    0.77    1.14
   6   2   3    0.93    0.76
   6  -2  -3    0.41    0.55
  -6   2  -3    0.03    0.95
   6  -2  -3    1.90    0.90
   6   2   3    0.30    0.94
   6  -2  -3    2.03    0.82
  -6   2  -3   -0.18    0.71
  -6  -2   3    1.93    1.03
  -6   3   3    1.34    1.38
   6   3  -3   -0.17    0.80
  -6  -3  -3   -1.10    0.93
   6  -3   3    1.09    0.93
  -6   3   3    1.57    0.87
   6   3  -3   -0.37    1.01
   6  -3   3   -1.33    1.34
  -6  -3  -3    0.96    0.54
  -6   3  -3   -0.17    0.88
   6   3   3   -0.99    0.71
   6   3   3   -0.20    0.88
   6  -3  -3    0.55    0.53
   6  -3  -3    0.84    0.76
  -6   3  -3   -0.47    0.68
  -6  -3   3   -0.67    0.94
   6  -3  -3   -0.54    0.68
   6   4  -3    1.37    0.96
   6  -4   3   -0.39    0.78
  -6  -4  -3    1.24    0.93
   6  -4   3    0.82    1.26
  -6   4   3   -2.37    1.47
   6  -4  -3    1.86    0.87
  -6  -4   3    0.23    0.87
  -6   4  -3    0.88    0.85
  -6   4  -3   -0.99    0.86
   6   4   3    1.30    0.78
   6  -4  -3    1.74    0.89
   6   4   3   -0.43    0.87
   6  -5   3    0.38    1.06
  -6  -5  -3    1.43    1.10
   6   5  -3    0.55    1.08
  -6   5   3    1.01    0.95
   6  -5   3    0.32    0.86
  -6   5   3    2.37    1.49
  -6   5  -3    0.23    0.78
  -6  -5   3   -3.16    1.24
   6   5   3   -0.04    0.75
   6  -5  -3    0.03    0.79
   6   5   3   -0.75    1.03
  -6   5  -3   -0.11    0.82
   6  -5  -3   -0.26    0.83
  -6   6   3   -0.21    1.14
  -6   6   3    1.48    1.20
  -6  -6  -3    0.54    1.16
   6  -6   3    0.78    1.27
   6  -6   3    0.78    1.07
   6   6  -3    0.32    0.99
   6  -6  -3   -0.68    0.88
   6   6   3    0.17    1.10
   6  -6  -3    1.25    1.18
  -6   6  -3   -0.69    1.08
  -6   6  -3    0.27    0.98
  -6  -7  -3    0.11    1.25
   6  -7   3    0.09    1.44
   6   7  -3    1.85    1.34
   6   7  -3    1.16    1.29
   6  -7   3    0.61    1.46
  -6   7   3   -1.73    1.29
   6  -7  -3   -0.37    1.07
   6   7   3   -2.18    1.48
   6  -7  -3    1.11    1.20
  -6   7  -3    0.75    1.10
  -6  -8  -3    2.70    1.64
  -6   8   3    1.74    1.54
   6   8  -3    0.88    1.50
   6  -8   3    1.04    2.16
   6   8  -3    0.36    1.66
  -6   8  -3    0.46    1.58
   6  -8  -3    0.71    1.43
   6  -8  -3   -2.21    1.40
   6   8   3   -3.26    1.69
   6   0   4  183.78    7.26
  -6   0   4  186.97    7.68
  -6   0   4  196.13    6.38
  -6   0  -4  188.82    6.91
   6   0   4  190.00    6.81
   6   0  -4  188.56    5.65
   6   0  -4  194.30    6.23
   6   0  -4  185.61    6.39
  -6   0  -4  192.79    7.23
  -6   1   4  122.23    4.67
   6  -1   4  118.82    5.64
  -6   1   4  112.97    5.76
   6   1  -4  116.94    4.88
  -6  -1  -4  129.73    5.50
   6   1  -4  112.41    3.84
   6  -1   4  119.87    5.32
   6   1  -4  112.66    4.70
  -6  -1  -4  118.72    5.56
   6  -1  -4  119.34    4.58
   6  -1  -4  119.96    4.39
  -6   1  -4  122.99    5.27
  -6  -1   4  118.44    4.77
  -6  -1   4  118.78    5.85
   6   1   4  122.33    5.81
   6   1   4  125.09    5.11
   6  -1  -4  123.24    4.75
  -6   1  -4  122.61    5.66
   6   2  -4  216.18    5.71
  -6  -2  -4  215.49    8.12
   6   2  -4  225.90    7.43
   6  -2   4  219.99    7.96
   6  -2   4  214.53    7.70
  -6  -2  -4  214.35    7.53
   6   2  -4  218.78    7.34
  -6   2   4  221.15    6.92
  -6   2   4  217.81    8.62
  -6  -2   4  208.61    7.18
   6  -2  -4  216.64    6.78
   6   2   4  212.59    8.17
   6   2   4  220.32    7.23
  -6   2  -4  216.28    7.68
   6  -2  -4  201.36    6.64
  -6   2  -4  221.57    7.57
   6  -2  -4  227.52    6.89
   6   3  -4   75.96    4.13
   6  -3   4   78.61    4.13
   6   3  -4   78.88    4.17
  -6  -3  -4   76.38    4.46
  -6   3   4   76.11    3.77
   6  -3   4   70.70    4.36
  -6   3   4   81.01    5.23
   6  -3  -4   76.63    3.73
   6  -3  -4   78.93    3.60
  -6   3  -4   77.49    4.13
   6   3   4   75.57    3.83
   6   3   4   73.18    4.40
  -6   3  -4   74.18    4.02
   6  -3  -4   70.35    3.58
  -6  -3   4   75.63    4.17
  -6   4   4  215.43    7.18
   6  -4   4  214.49    7.49
  -6  -4  -4  202.95    7.87
  -6   4   4  203.02    8.64
   6  -4   4  201.91    8.05
   6   4  -4  193.42    7.38
   6   4  -4  205.39    7.66
   6  -4  -4  203.84    7.03
  -6   4  -4  204.51    7.31
   6   4   4  193.32    7.90
   6  -4  -4  204.14    7.05
   6   4   4  205.41    7.03
  -6   4  -4  210.04    7.43
  -6   5   4   53.36    4.23
  -6  -5  -4   57.47    3.98
   6  -5   4   57.73    4.21
   6   5  -4   54.44    3.63
   6  -5   4   57.65    3.66
   6   5  -4   58.89    3.89
  -6  -5  -4   54.65    2.82
  -6   5   4   55.35    3.63
   6  -5  -4   55.11    3.55
  -6   5  -4   55.70    3.65
   6  -5  -4   56.33    3.52
  -6   5  -4   62.59    3.76
   6   5   4   58.31    3.98
   6   5   4   59.29    3.40
   6   6  -4  105.33    5.61
  -6   6   4  108.43    6.33
  -6  -6  -4  113.74    5.98
   6   6  -4  109.44    5.48
  -6   6   4  116.50    5.72
   6  -6   4  100.07    5.97
   6  -6  -4  112.83    5.55
  -6   6  -4  105.31    5.26
   6   6   4  113.27    6.06
  -6   6  -4  105.56    5.30
   6  -6  -4  106.01    5.36
   6   7  -4   40.84    3.58
   6   7  -4   44.43    3.83
  -6  -7  -4   43.51    3.89
   6  -7   4   43.71    4.22
  -6   7   4   39.29    3.52
   6   7   4   41.78    3.83
  -6   7  -4   38.77    3.39
   6  -7  -4   38.80    3.41
   6  -7  -4   37.63    3.39
   6   8  -4   44.41    4.14
   6   8  -4   49.62    4.13
  -6  -8  -4   49.04    4.39
  -6   8  -4   48.69    4.00
   6   8   4   38.59    3.99
   6  -8  -4   52.53    4.09
   6  -8  -4   51.59    4.23
   6   0   5   -1.61    1.07
  -6   0  -5    0.10    0.84
   6   0  -5    0.11    0.53
  -6   0   5   -0.40    1.11
  -6   0  -5    0.30    0.78
   6   0  -5    1.49    0.81
   6   0   5   -0.23    0.84
  -6  -1  -5    1.08    0.90
   6   1  -5   -0.87    0.68
   6  -1   5    0.96    1.00
   6   1  -5   -0.25    0.69
  -6   1   5    1.15    1.34
   6  -1   5    0.20    0.99
   6   1  -5   -1.35    0.76
  -6  -1  -5    2.58    1.19
  -6   1  -5    0.29    0.91
  -6   1  -5    0.05    0.98
   6  -1  -5    0.10    0.72
   6   1   5   -0.78    1.04
   6   1   5    0.33    0.91
  -6  -1   5   -0.79    1.16
   6  -1  -5    0.82    0.70
   6  -1  -5    0.23    0.60
   6   2  -5    0.72    0.77
   6  -2   5   -1.23    1.03
  -6  -2  -5    0.81    1.23
  -6   2   5   -0.72    1.37
   6  -2   5    0.35    1.11
   6   2  -5    0.84    0.79
   6   2   5    1.74    1.03
   6  -2  -5    1.28    0.84
  -6   2  -5    0.21    0.85
   6   2   5    1.09    1.22
   6  -2  -5   -0.21    0.65
  -6   2  -5   -0.16    0.84
   6  -2  -5    0.07    0.69
  -6   3   5    1.98    1.68
  -6  -3  -5    1.35    1.17
   6   3  -5   -0.03    0.74
   6  -3   5   -0.26    1.42
  -6  -3  -5   -2.16    1.26
   6   3  -5   -0.26    0.83
   6  -3  -5    0.57    0.83
   6  -3  -5   -0.31    0.70
   6  -3  -5    0.04    0.79
   6   3   5   -0.11    1.01
  -6   3  -5    1.35    0.86
   6   3   5    0.79    0.93
  -6   3  -5    0.53    0.95
   6   4  -5   -0.11    0.94
  -6  -4  -5    0.91    1.27
   6   4  -5    2.06    1.05
   6  -4   5   -0.54    1.39
  -6   4   5   -1.96    1.58
  -6  -4  -5   -0.58    1.31
   6   4   5    0.74    1.01
   6  -4  -5    0.08    0.85
   6   4   5   -2.89    1.38
  -6   4  -5   -2.28    1.19
  -6   4  -5    2.50    1.07
   6  -4  -5    0.36    0.91
  -6  -5  -5    0.16    1.22
   6   5  -5   -2.28    1.32
   6  -5   5   -1.16    1.36
  -6   5   5   -2.52    1.62
   6   5  -5   -1.39    1.24
  -6  -5  -5   -0.62    0.78
   6  -5  -5   -0.32    0.95
   6  -5  -5    0.36    0.93
  -6   5  -5    0.71    1.05
   6   5   5   -1.33    1.03
   6   5   5   -0.47    1.28
  -6   5  -5   -0.12    0.89
   6   6  -5   -0.34    1.30
  -6  -6  -5   -1.10    1.27
   6  -6   5   -0.48    1.60
   6   6  -5    1.87    1.83
  -6   6   5    1.07    1.46
   6  -6  -5   -0.90    1.27
  -6   6  -5   -0.15    0.95
  -6   6  -5   -0.73    1.09
   6   6   5   -0.69    1.25
   6  -6  -5   -0.34    1.05
  -6  -7  -5    0.85    1.93
   6   7  -5    2.47    1.58
   6  -7   5   -0.65    2.12
   6   7  -5   -1.78    1.66
  -6   7   5   -1.33    3.04
  -6   7  -5    1.47    1.37
   6  -7  -5   -0.25    1.15
   6  -7  -5    0.51    1.33
  -6   7  -5   -0.65    1.58
   6   7   5    2.79    1.74
   6   0  -6  171.91    5.21
   6   0  -6  182.93    6.86
   6   0  -6  175.75    5.99
  -6   0   6  187.33    8.18
  -6   0  -6  176.81    6.99
   6   0   6  176.27    7.13
  -6   0  -6  179.18    6.85
  -6  -1  -6   78.33    4.38
   6   1  -6   72.11    3.47
  -6   1   6   73.68    4.97
  -6  -1  -6   76.72    4.36
   6   1  -6   76.11    4.24
   6   1  -6   77.42    3.02
   6  -1   6   85.22    4.76
   6  -1  -6   74.70    4.05
   6   1   6   80.81    4.48
  -6   1  -6   78.57    4.39
   6  -1  -6   71.13    3.68
  -6   1  -6   81.33    4.22
   6  -1  -6   78.45    3.17
  -6  -1   6   77.06    5.12
  -6   2   6  134.32    6.99
   6  -2   6  132.40    6.32
   6   2  -6  132.33    5.81
  -6  -2  -6  132.02    5.96
   6   2  -6  133.74    4.63
  -6  -2  -6  136.99    6.28
   6  -2  -6  137.49    5.51
  -6   2  -6  128.59    5.37
   6  -2  -6  130.56    4.64
   6  -2  -6  134.09    5.76
   6   2   6  132.35    6.03
  -6  -2   6  135.99    6.98
  -6   2  -6  127.19    5.98
   6   3  -6   80.06    4.55
  -6  -3  -6   76.81    4.82
   6   3  -6   78.15    3.55
  -6  -3  -6   91.33    5.04
   6  -3   6   83.98    5.03
  -6   3   6   76.38    5.50
  -6   3  -6   81.56    4.69
   6   3   6   78.44    4.52
  -6   3  -6   77.90    3.87
   6  -3  -6   79.05    3.68
   6  -3  -6   77.27    4.31
   6  -3  -6   80.09    4.21
  -6  -4  -6   79.09    4.99
  -6  -4  -6   83.93    4.16
  -6  -4  -6   80.25    4.70
   6  -4   6   74.07    4.97
   6   4  -6   79.26    4.70
   6   4  -6   76.20    3.86
  -6   4   6   89.05    5.87
  -6   4  -6   81.46    4.74
   6   4   6   81.27    4.60
   6  -4  -6   80.94    4.43
  -6   4  -6   78.83    4.03
   6  -4  -6   84.28    4.05
  -6  -5  -6   52.45    3.32
  -6   5   6   52.04    4.49
  -6  -5  -6   53.98    4.00
   6  -5   6   56.28    4.42
   6   5  -6   54.66    3.65
  -6  -5  -6   50.07    3.99
   6   5  -6   50.01    3.83
   6   5   6   53.80    3.76
   6  -5  -6   50.70    3.35
  -6   5  -6   50.44    3.33
  -6   5  -6   45.87    3.80
   6  -5  -6   52.13    3.70
   6   6  -6   62.77    4.45
  -6   6   6   64.32    5.04
   6  -6   6   58.50    4.79
  -6  -6  -6   61.18    4.40
   6   6  -6   60.34    4.07
  -6  -6  -6   70.99    4.89
  -6   6  -6   62.47    3.90
   6   6   6   66.01    4.24
  -6   6  -6   60.78    4.44
   6  -6  -6   60.34    4.14
   6  -6  -6   65.63    3.99
   6   7  -6   25.61    3.17
  -6   7   6   25.82    3.45
  -6  -7  -6   27.78    3.23
  -6  -7  -6   27.26    3.43
   6  -7  -6   24.28    2.94
   6  -7  -6   21.27    2.74
  -6   7  -6   24.26    3.04
  -6   7  -6   24.56    2.67
   6   0  -7    1.70    0.90
   6   0   7    1.88    1.28
  -6   0   7    0.51    1.45
  -6   0  -7   -1.37    1.18
  -6   0  -7   -0.93    1.13
  -6  -1  -7    0.71    1.13
   6   1  -7   -0.73    0.88
   6  -1   7    0.86    1.17
  -6   1   7    0.22    1.21
  -6  -1  -7    0.44    1.10
   6   1  -7   -1.51    1.10
  -6   1  -7    0.29    0.88
  -6  -1   7    1.69    1.60
   6  -1  -7    0.63    0.85
   6  -1  -7   -0.26    1.01
   6   1   7    2.31    1.29
   6  -1  -7    0.36    0.56
  -6   1  -7   -1.04    1.10
   6  -2   7   -2.40    1.36
  -6  -2  -7   -0.97    1.23
  -6   2   7    1.13    1.58
  -6  -2  -7   -0.54    1.21
   6   2  -7    0.18    1.02
   6  -2  -7    1.75    0.85
   6  -2  -7    0.74    1.17
  -6  -2   7    0.47    1.51
  -6   2  -7   -0.46    1.17
   6   2   7    0.42    1.11
   6  -2  -7   -1.22    1.11
  -6   2  -7    0.89    0.78
   6  -3   7   -0.07    1.36
  -6  -3  -7    2.50    1.45
   6   3  -7   -0.51    1.20
  -6   3   7   -0.13    1.56
  -6  -3  -7    0.48    1.11
   6  -3  -7   -0.84    1.17
  -6   3  -7    0.22    1.11
  -6   3  -7   -0.02    0.76
   6  -3  -7   -1.32    0.80
   6   3   7    0.29    1.09
   6  -3  -7   -0.16    1.15
   6  -4   7   -1.33    1.72
  -6  -4  -7    1.16    1.25
   6   4  -7   -1.36    1.37
  -6   4   7    0.12    1.64
  -6  -4  -7    0.48    1.39
  -6   4  -7   -0.01    1.34
  -6   4  -7    0.09    0.82
   6  -4  -7    1.18    1.14
   6  -4  -7    0.59    0.88
   6   4   7    0.72    1.14
  -6   5   7    2.37    2.26
   6  -5   7   -1.98    1.71
   6   5  -7    0.66    1.26
  -6  -5  -7   -1.04    2.60
  -6  -5  -7   -0.47    1.62
  -6  -5  -7   -1.34    2.01
   6   5   7   -1.26    1.45
   6  -5  -7   -1.79    1.53
   6  -5  -7   -0.12    1.19
  -6   5  -7    0.82    1.30
  -6   6   7   -2.26    3.09
   6  -6   7    1.68    2.81
   6   6  -7   -1.28    2.57
  -6  -6  -7   -1.70    1.87
  -6  -6  -7    1.57    2.95
   6   6   7    3.17    1.83
  -6   6  -7    0.61    1.65
  -6   6  -7    1.26    2.34
   6  -6  -7    4.45    1.77
   6  -6  -7   -1.47    1.44
  -6   0   8   73.54    5.35
   6   0   8   76.31    4.98
  -6   0  -8   70.10    3.73
   6   0  -8   78.60    4.64
  -6   0  -8   71.94    4.52
   6   0  -8   79.41    4.28
   6   1  -8   42.02    3.43
  -6  -1  -8   43.27    3.43
  -6  -1  -8   43.19    3.08
   6  -1   8   37.35    3.65
  -6   1   8   38.14    3.99
   6  -1  -8   47.34    3.32
  -6  -1   8   36.77    4.01
  -6   1  -8   42.31    2.58
   6  -1  -8   40.73    3.45
   6   1   8   44.11    3.78
  -6   1  -8   46.95    3.64
  -6  -2  -8   84.75    4.94
   6   2  -8   85.66    5.11
  -6   2   8   84.77    5.84
   6  -2   8   93.07    5.64
  -6  -2  -8   80.69    4.58
  -6   2  -8   87.93    5.17
   6  -2  -8   81.40    5.04
   6  -2  -8   85.16    4.73
  -6  -2   8   95.03    6.38
   6   2   8   86.28    5.45
  -6   3   8   32.33    4.02
   6  -3   8   30.66    3.49
  -6  -3  -8   33.08    3.20
  -6  -3  -8   35.60    3.24
   6   3  -8   31.48    3.19
  -6   3  -8   27.12    3.03
   6   3   8   36.05    3.42
  -6  -3   8   34.18    3.94
   6  -3  -8   33.33    3.06
  -6  -4  -8   79.24    5.19
  -6   4   8   72.53    5.55
   6  -4   8   73.78    5.42
  -6  -4  -8   76.26    4.86
   6   4  -8   78.85    4.98
   6   4   8   86.25    5.38
   6  -4  -8   75.06    4.72
  -6   4  -8   73.55    5.00
  -6  -5  -8   20.39    3.12
   6  -5   8   24.48    3.40
  -6   5   8   19.84    3.19
   6   5  -8   26.95    3.18
  -6  -5  -8   28.89    3.12
   6  -5  -8   25.35    3.05
   6  -5  -8   24.47    2.40
   6  -5  -8   21.35    2.33
  -6   5  -8   22.59    3.10
   6   5   8   24.43    3.12
  -6   0  -9   -0.61    1.37
   6   0  -9    0.21    1.28
   6   0  -9    0.10    2.55
  -6   0   9    2.67    1.84
   6   0   9    0.68    1.38
  -6  -1  -9   -1.44    1.68
   6  -1   9   -0.42    1.40
   6   1  -9    0.24    1.40
  -6   1   9    2.29    1.85
  -6   1  -9   -0.13    1.29
   6  -1  -9   -1.91    2.91
  -6  -1   9    0.63    1.98
   6   1   9   -1.17    1.44
   6  -1  -9    0.91    1.31
  -6  -2  -9   -3.00    1.71
  -6   2   9    2.63    3.70
   6   2  -9   -2.69    1.50
   6  -2   9    2.73    1.73
   6  -2  -9   -1.77    1.43
   6   2   9   -1.36    1.97
  -6  -2   9    0.67    3.63
   6  -2  -9   -0.30    1.57
  -6   2  -9    0.75    1.46
  -6   3   9   -0.04    2.60
   6  -3   9    2.08    1.91
  -6  -3  -9    0.06    1.96
   6   3  -9   -0.31    1.45
   6   3   9    3.97    2.85
  -6   3  -9    0.06    1.51
  -6  -3   9   -0.93    2.04
   6  -3  -9    2.06    1.63
   7   0   0    7.05    1.17
  -7   0   0    8.70    1.35
   7   0   0    7.81    1.54
  -7   0   0    7.12    1.45
   7  -1   0  385.72   11.60
  -7   1   0  363.96   11.47
   7  -1   0  378.79   10.12
   7   1   0  365.81   11.39
   7   1   0  359.00    9.47
  -7  -1   0  384.32   10.61
  -7  -1   0  363.24   11.35
  -7   1   0  366.69   10.62
  -7   1   0  366.38    9.94
  -7   2   0   18.73    1.70
   7  -2   0   18.16    1.23
  -7   2   0   17.67    2.25
   7  -2   0   21.52    2.40
  -7   2   0   18.05    2.06
   7   2   0   17.80    1.48
   7   2   0   15.75    2.12
  -7  -2   0   19.06    1.96
  -7  -2   0   16.11    2.12
   7  -2   0   15.89    1.80
  -7   3   0  285.95    7.75
  -7   3   0  291.62    9.40
   7  -3   0  275.21    9.44
   7   3   0  280.69    7.25
   7  -3   0  281.80    8.87
  -7   3   0  284.89    9.67
  -7  -3   0  275.10    9.68
   7   3   0  285.66    9.79
  -7   4   0   23.93    1.66
   7  -4   0   22.06    2.47
   7  -4   0   23.20    2.37
  -7  -4   0   24.89    2.56
  -7   4   0   22.03    2.45
  -7   4   0   26.95    2.62
   7   4   0   23.98    2.54
  -7  -5   0  192.15    7.85
  -7   5   0  194.05    7.86
   7   5   0  207.67    8.20
   7  -5   0  198.51    7.84
  -7   5   0  200.78    7.81
   7  -5   0  193.78    7.68
   7  -6   0   10.42    1.93
  -7  -6   0    6.75    1.72
  -7   6   0    9.11    1.83
   7   6   0    8.38    1.83
   7  -6   0    8.33    1.77
  -7  -7   0  121.52    6.62
  -7   7   0  129.33    6.72
   7   7   0  126.29    6.71
   7  -7   0  119.64    6.50
   7  -7   0  130.74    6.54
   7  -8   0   -1.29    1.58
  -7  -8   0    3.81    1.89
   7  -8   0    2.47    2.36
  -7   8   0    2.57    1.67
   7   8   0    0.65    1.66
  -7   0  -1   -0.54    0.75
  -7   0   1    0.73    0.85
   7   0  -1   -0.83    0.59
   7   0  -1    2.63    1.09
  -7   0   1   -0.07    0.84
   7   0   1   -0.19    0.93
  -7   0  -1    0.75    0.70
  -7   0  -1   -1.82    1.06
   7   0   1    1.00    0.94
  -7   1   1   -1.91    1.10
   7  -1   1   -1.59    1.10
   7   1  -1    0.72    0.56
  -7  -1  -1    1.57    0.78
  -7  -1  -1    1.22    1.05
  -7   1   1    1.27    1.13
   7   1  -1    0.07    0.89
  -7   1   1    0.69    0.56
   7  -1   1    0.14    0.91
  -7  -1   1    0.38    0.93
  -7  -1   1   -0.29    0.86
   7   1   1    0.91    0.88
   7  -1  -1    0.36    0.65
   7  -1  -1   -0.58    0.53
   7  -1  -1   -0.11    1.11
  -7   1  -1    1.84    1.08
  -7   1  -1   -0.09    0.74
  -7   1  -1    0.77    0.69
   7   1   1   -1.25    1.07
   7  -2   1    7.10    1.40
   7  -2   1    8.14    1.83
   7   2  -1    7.45    0.89
   7   2  -1   11.83    1.91
  -7   2   1    9.99    1.79
  -7  -2  -1    7.88    1.29
  -7   2   1    5.92    1.01
  -7  -2  -1    8.02    1.64
  -7   2   1    6.79    1.59
  -7  -2   1    8.88    1.68
   7  -2  -1    7.24    1.25
  -7   2  -1    6.56    1.68
   7   2   1    9.07    1.73
  -7   2  -1    7.40    1.34
   7   2   1    7.86    1.23
   7  -2  -1    7.55    0.95
  -7   2  -1    6.73    1.20
   7  -2  -1    7.55    1.64
  -7  -2   1    5.69    1.36
   7  -3   1    0.24    0.89
  -7   3   1    0.42    0.47
  -7   3   1    1.29    1.30
  -7  -3  -1    0.94    0.84
   7   3  -1    0.28    0.43
  -7  -3  -1    0.73    1.11
   7  -3   1   -0.72    0.92
   7   3  -1    0.88    1.00
  -7   3   1   -0.89    1.09
   7  -3  -1   -1.65    0.93
  -7   3  -1    0.04    0.93
   7   3   1   -1.21    0.74
  -7   3  -1    0.59    0.65
   7   3   1    1.90    1.22
   7  -3  -1    0.69    1.04
  -7   3  -1   -1.62    1.05
  -7  -3   1    0.42    1.01
   7  -4   1    0.25    0.93
  -7  -4  -1    0.76    1.11
   7   4  -1    0.57    0.96
   7  -4   1   -0.57    1.02
  -7   4   1   -0.58    1.19
  -7   4   1    2.09    1.14
  -7   4  -1   -0.17    0.93
   7  -4  -1    0.70    0.96
   7  -4  -1    1.14    0.96
   7   4   1    0.67    0.69
   7   4   1    0.35    1.10
  -7   4  -1   -0.44    0.70
  -7  -4   1    1.04    1.01
  -7   4  -1   -1.42    1.00
   7  -5   1    0.28    0.99
   7  -5   1    0.89    1.00
  -7  -5  -1   -0.30    1.07
   7   5  -1    1.23    1.20
  -7   5   1    1.82    1.52
  -7   5   1   -1.46    1.14
  -7   5  -1    1.46    1.11
  -7   5  -1    1.64    0.83
   7   5   1    1.80    1.28
  -7  -5   1   -0.91    1.11
   7  -5  -1    2.54    1.30
   7  -5  -1   -0.51    0.94
   7  -6   1    2.26    1.27
  -7   6   1    1.20    1.24
  -7   6   1    1.77    1.46
   7   6  -1    1.25    1.31
   7  -6   1   -0.67    1.23
  -7  -6  -1    1.20    1.24
  -7   6  -1    2.38    1.34
  -7  -6   1    1.71    1.34
   7   6   1    4.04    1.50
   7  -6  -1    2.18    1.13
   7  -6  -1    3.15    1.40
  -7  -7  -1    0.97    1.31
  -7   7   1    0.07    1.20
   7  -7   1    1.15    1.49
   7   7  -1   -0.33    1.19
   7  -7   1   -1.65    1.41
  -7  -7   1   -1.30    1.34
   7  -7  -1   -0.17    1.25
   7   7   1   -1.11    1.43
  -7   7  -1   -0.85    1.38
   7  -7  -1   -1.35    1.33
   7  -8   1    1.01    1.73
  -7   8   1   -1.98    1.59
   7  -8   1    1.59    2.93
  -7  -8  -1    0.14    1.41
   7   8  -1    3.83    1.89
  -7  -8   1    2.98    2.94
   7   8   1   -1.90    1.73
   7  -8  -1    3.00    1.61
   7  -8  -1   -2.44    1.64
   7   0  -2   28.56    2.56
  -7   0   2   28.30    2.62
   7   0   2   26.25    2.23
  -7   0  -2   34.47    2.57
   7   0  -2   28.32    2.01
  -7   0  -2   27.66    1.91
   7   0   2   29.27    2.80
  -7   0   2   27.59    2.48
  -7   0  -2   28.44    2.74
   7   0  -2   27.60    1.95
  -7   1   2  362.91   11.32
   7   1  -2  372.86   11.21
   7   1  -2  386.77    9.35
  -7  -1  -2  373.12    9.45
  -7  -1  -2  357.90   11.46
  -7   1   2  383.17   11.49
   7  -1   2  375.85   10.64
   7  -1   2  367.01   11.83
  -7   1  -2  349.82   11.47
   7   1   2  365.54   11.69
   7  -1  -2  367.75    9.67
   7   1   2  374.45   10.25
  -7  -1   2  359.44   11.22
   7  -1  -2  385.41   11.36
  -7  -1   2  366.07   11.20
  -7   1  -2  373.30    9.79
  -7   1  -2  370.79   10.81
   7  -1  -2  376.16   10.06
  -7   2   2   14.49    2.12
   7  -2   2   14.25    2.02
  -7   2   2   12.62    1.13
   7   2  -2   13.86    2.04
  -7   2   2   12.81    1.83
   7   2  -2   13.02    1.09
  -7  -2  -2   10.51    1.90
  -7  -2  -2   13.59    1.33
   7  -2   2   12.21    2.12
   7  -2  -2   14.97    1.68
   7   2   2   16.63    2.22
  -7   2  -2   14.01    1.74
  -7   2  -2   12.08    1.47
  -7   2  -2   14.26    2.24
  -7  -2   2   10.78    1.85
  -7  -2   2   11.63    1.82
   7  -2  -2   11.35    1.75
   7  -2  -2   13.90    1.31
   7   2   2   13.64    1.59
   7  -3   2  312.15   10.53
  -7  -3  -2  316.45    8.69
   7   3  -2  329.21   10.64
  -7   3   2  313.36   10.97
  -7   3   2  322.46   10.05
  -7  -3  -2  291.96   10.30
   7  -3   2  302.51    9.75
  -7   3  -2  302.68   10.45
  -7  -3   2  333.30   10.72
   7   3   2  309.88   10.55
   7   3   2  315.71    8.80
  -7   3  -2  303.78    9.11
   7  -3  -2  323.51    9.62
  -7   3  -2  312.44    9.28
   7  -3  -2  332.46   10.11
  -7  -4  -2    3.03    1.22
   7   4  -2    1.86    1.11
   7  -4   2    4.59    1.34
  -7   4   2    2.75    1.18
   7  -4   2    3.33    1.32
  -7   4   2    3.35    1.54
  -7   4  -2    2.45    1.17
   7  -4  -2    3.54    1.18
   7  -4  -2    4.72    1.23
   7   4   2    4.67    1.40
   7   4   2    3.39    0.93
  -7  -4   2    4.50    1.35
   7   5  -2  204.96    8.23
  -7   5   2  215.74    8.17
  -7   5   2  203.20    8.76
   7  -5   2  208.75    8.18
   7  -5   2  217.88    8.44
  -7  -5  -2  213.20    8.44
  -7   5  -2  215.17    8.38
  -7  -5   2  209.23    8.30
   7  -5  -2  215.87    8.04
   7  -5  -2  223.96    8.25
  -7   5  -2  219.66    7.31
   7   5   2  214.51    8.62
  -7  -6  -2    5.76    1.64
  -7   6   2    8.98    2.15
   7  -6   2    4.24    1.60
   7   6  -2    4.54    1.68
  -7   6   2    4.48    1.58
   7  -6   2    7.04    1.76
   7   6   2    4.31    1.56
   7  -6  -2    2.90    1.23
  -7   6  -2    6.62    1.76
  -7  -6   2    3.68    1.52
  -7   6  -2    3.33    1.14
   7  -6  -2    6.14    1.70
   7  -7   2  119.20    6.45
   7   7  -2  114.20    6.35
  -7   7   2  119.48    6.48
  -7  -7  -2  126.15    6.87
   7  -7   2  127.27    6.84
   7  -7  -2  120.06    6.35
   7   7   2  125.15    6.87
   7  -7  -2  114.03    6.22
  -7   7  -2  120.52    6.49
   7   8  -2    9.87    2.39
  -7   8   2    1.49    1.62
  -7  -8  -2    2.34    2.01
   7  -8   2    5.69    2.14
   7  -8   2    4.27    2.67
  -7   8  -2    5.36    2.01
   7   8   2    3.35    1.91
  -7   0  -3   -0.05    0.55
  -7   0   3    0.61    1.23
   7   0   3   -1.29    1.11
   7   0  -3    0.40    0.64
  -7   0   3    1.62    1.12
  -7   0  -3   -2.41    1.22
  -7   0  -3    0.18    0.80
   7   0  -3    0.05    0.59
   7   0   3    0.49    1.09
   7   0  -3   -0.82    0.58
   7   0  -3    0.50    1.01
  -7  -1  -3    0.33    0.98
   7   1  -3    0.63    0.94
   7   1  -3   -0.31    0.49
  -7   1   3    2.63    1.17
   7   1  -3    0.65    0.54
  -7   1   3    1.00    1.07
  -7  -1  -3    0.04    0.48
   7  -1   3   -0.53    0.96
   7   1  -3    0.23    0.73
  -7  -1  -3   -0.67    0.82
   7  -1   3    0.39    1.12
  -7   1  -3    0.59    1.01
  -7  -1   3    0.32    1.01
   7  -1  -3    0.02    0.65
   7   1   3    0.64    1.02
  -7  -1   3    0.20    0.88
  -7   1  -3   -1.34    0.69
   7  -1  -3   -0.24    0.67
   7   1   3   -0.84    0.88
  -7   1  -3   -1.29    1.09
   7  -1  -3    0.39    1.03
   7   2  -3    7.04    1.32
  -7   2   3    5.04    1.31
   7  -2   3    5.60    1.59
   7   2  -3    6.66    1.54
  -7  -2  -3    4.83    1.51
  -7   2   3    6.26    1.61
   7  -2   3    5.12    1.56
   7  -2  -3    5.03    1.24
   7  -2  -3    4.66    1.17
  -7   2  -3    7.39    1.78
   7   2   3    8.19    1.76
  -7  -2   3    4.60    1.40
   7  -2  -3    4.74    1.00
  -7   2  -3    4.55    0.97
   7   2   3    2.42    1.04
  -7  -2   3    4.40    1.33
  -7   2  -3    4.97    1.28
   7  -3   3    1.69    1.12
   7   3  -3   -1.79    1.06
  -7   3   3    0.69    1.24
   7  -3   3    1.16    1.22
  -7   3   3   -1.69    0.97
  -7  -3  -3    0.17    1.11
   7   3  -3   -0.93    1.18
   7   3   3   -0.68    0.78
   7  -3  -3    0.06    0.71
  -7   3  -3    0.06    0.90
   7   3   3    0.75    1.17
  -7  -3   3   -0.38    1.04
   7  -3  -3   -0.95    0.91
  -7   3  -3    1.21    0.98
   7  -3  -3   -0.56    0.60
   7  -4   3   -1.16    1.40
   7   4  -3   -1.87    1.26
   7  -4   3    0.70    1.08
  -7   4   3    0.61    1.00
  -7  -4  -3    1.78    1.11
  -7   4   3   -0.55    1.27
   7  -4  -3   -1.59    0.99
   7   4   3    0.07    0.75
  -7  -4   3   -1.36    1.15
   7   4   3   -2.12    1.22
  -7   4  -3    3.28    1.27
   7  -4  -3    0.27    0.79
  -7   4  -3    0.52    0.98
   7  -5   3   -0.08    1.00
  -7  -5  -3    0.52    1.09
  -7   5   3    0.62    1.07
  -7   5   3    0.65    1.37
   7  -5   3   -0.29    1.24
   7   5   3   -0.18    1.19
  -7   5  -3    0.19    0.94
   7  -5  -3   -1.35    1.16
   7  -5  -3   -1.07    0.93
  -7   5  -3   -0.17    1.01
  -7  -6  -3    2.01    1.40
   7  -6   3    1.90    1.42
   7   6  -3    2.13    1.43
  -7   6   3    1.07    1.64
   7  -6   3    1.94    1.29
  -7   6   3    5.57    1.64
   7  -6  -3    3.88    1.47
   7  -6  -3    1.82    1.29
   7   6   3    0.91    1.38
  -7   6  -3    3.49    1.39
  -7   6  -3    2.62    1.25
   7   7  -3   -1.10    1.64
  -7  -7  -3   -3.08    1.72
   7  -7   3    0.91    1.61
  -7   7   3    2.12    1.65
   7   7  -3   -1.79    1.61
   7   7   3    0.92    1.56
   7  -7  -3    0.13    1.26
   7  -7  -3   -0.48    1.35
  -7   7  -3   -2.11    1.52
  -7   0   4    7.14    1.69
   7   0  -4    7.44    1.32
   7   0  -4    5.94    1.22
   7   0   4    7.12    1.58
  -7   0   4    6.27    1.33
  -7   0  -4    5.98    1.43
   7   0  -4    5.89    0.99
   7   0   4   10.37    1.72
  -7   0  -4    5.76    1.39
  -7  -1  -4  255.57    8.74
  -7   1   4  263.85    9.63
   7   1  -4  267.96    8.46
  -7  -1  -4  245.01    8.91
   7   1  -4  254.15    8.24
   7  -1   4  262.58    9.24
  -7   1   4  261.09    8.25
   7   1  -4  254.18    6.94
   7  -1   4  263.06    8.89
  -7  -1   4  259.84    8.30
  -7  -1   4  273.39    9.94
   7   1   4  253.81    8.39
   7  -1  -4  255.51    7.97
   7  -1  -4  245.76    7.62
   7   1   4  259.07    9.36
  -7   1  -4  263.94    8.94
  -7   1  -4  263.89    9.25
   7  -1  -4  255.06    8.17
   7  -1  -4  253.37    7.58
  -7  -2  -4   12.75    1.82
   7  -2   4   15.16    2.17
  -7   2   4   13.52    1.66
   7   2  -4   12.50    1.71
   7  -2   4   15.64    2.18
  -7   2   4   11.55    2.16
   7   2  -4   11.06    1.67
  -7  -2  -4   13.00    2.11
   7   2   4   12.31    1.67
  -7  -2   4   12.67    2.09
   7  -2  -4   10.64    1.50
  -7  -2   4   11.56    1.67
   7  -2  -4   10.94    1.45
   7  -2  -4   12.39    1.55
   7   2   4   10.99    1.97
  -7   2  -4   15.61    2.21
  -7   2  -4   10.36    1.74
   7  -2  -4    9.83    1.49
   7  -3   4  196.47    7.95
   7  -3   4  203.61    7.81
  -7  -3  -4  210.47    7.89
  -7  -3  -4  207.16    8.32
   7   3  -4  211.29    7.78
  -7   3   4  201.83    8.73
  -7   3   4  203.96    7.27
   7   3  -4  223.22    7.96
  -7   3  -4  197.73    7.50
  -7   3  -4  214.41    7.95
   7  -3  -4  200.73    7.13
   7  -3  -4  203.86    6.72
   7  -3  -4  194.10    6.84
   7  -3  -4  198.12    7.07
   7   3   4  200.58    8.21
   7   3   4  208.35    7.27
  -7  -4  -4   15.98    2.42
   7   4  -4   17.27    2.21
   7   4  -4   19.61    2.38
   7  -4   4   18.01    2.57
   7  -4   4   13.33    2.06
  -7   4   4   24.69    3.23
   7   4   4   17.69    1.94
   7  -4  -4   17.45    2.05
  -7   4  -4   21.31    2.40
  -7   4  -4   16.65    2.16
   7  -4  -4   17.17    2.04
   7   4   4   14.47    2.34
  -7   5   4  143.41    7.66
   7   5  -4  152.47    6.82
   7  -5   4  142.11    7.03
   7   5  -4  149.52    6.70
  -7   5   4  143.11    6.45
   7  -5   4  144.81    6.67
  -7  -5  -4  151.91    7.22
   7   5   4  147.54    5.92
   7  -5  -4  151.29    6.49
  -7   5  -4  145.97    6.46
  -7   5  -4  151.70    6.65
   7   5   4  137.21    6.96
   7  -5  -4  150.41    6.26
  -7   6   4    9.64    2.41
  -7  -6  -4    7.84    1.93
  -7   6   4    6.58    1.66
   7  -6   4    5.65    1.99
   7   6  -4    8.31    1.90
   7   6  -4   10.38    2.13
   7  -6  -4    5.57    1.63
   7  -6  -4    8.60    1.87
   7   6   4    9.61    2.16
  -7   6  -4    6.12    1.66
  -7   6  -4    6.02    1.69
   7   7  -4   88.05    5.48
  -7  -7  -4   90.64    5.98
   7  -7   4   99.81    6.35
  -7   7   4   91.64    6.25
   7   7  -4   94.00    5.85
   7  -7  -4   89.60    5.41
   7  -7  -4   86.33    5.29
   7   7   4   80.14    5.72
  -7   7  -4   92.73    5.28
  -7   7  -4   88.42    5.45
   7   0  -5   -0.09    0.73
   7   0  -5   -0.37    0.74
   7   0   5   -0.59    1.05
   7   0   5   -0.21    0.88
  -7   0  -5   -0.42    0.93
  -7   0  -5   -0.84    0.95
  -7   0   5   -2.47    1.39
   7   0  -5    0.76    0.78
   7   1  -5    0.77    0.85
   7  -1   5    0.00    1.13
   7  -1   5    1.09    1.17
  -7  -1  -5   -0.54    1.13
  -7   1   5   -1.04    1.32
  -7  -1  -5    1.73    1.05
   7   1  -5    1.10    0.96
   7   1  -5   -0.14    0.66
   7  -1  -5    0.20    0.78
  -7   1  -5    0.60    1.09
   7  -1  -5    0.78    0.75
  -7  -1   5    0.80    1.39
   7  -1  -5    1.68    0.90
  -7   1  -5    2.51    1.27
   7   1   5    0.22    1.18
   7   2  -5    3.51    1.07
   7  -2   5    4.26    1.41
  -7  -2  -5    3.58    1.49
   7  -2   5    4.98    1.60
   7   2  -5    4.46    1.28
  -7   2   5    2.19    1.38
  -7  -2  -5    3.45    1.34
   7  -2  -5    2.40    1.09
   7  -2  -5    3.33    1.09
  -7  -2   5    0.20    1.16
   7   2   5    3.01    1.28
   7  -2  -5    3.25    1.00
  -7   2  -5    2.04    1.21
  -7  -3  -5   -1.55    1.37
   7  -3   5    5.09    1.77
  -7   3   5    1.29    1.48
   7   3  -5   -0.02    1.02
   7   3  -5    1.17    1.03
  -7  -3  -5    0.07    1.10
   7  -3  -5    0.08    0.99
   7  -3  -5    0.56    0.88
   7   3   5    0.69    1.32
   7  -3  -5   -0.49    0.82
   7   3   5   -0.70    0.96
  -7   3  -5    1.69    1.26
  -7   3  -5    1.14    0.98
  -7  -4  -5   -1.43    1.46
  -7  -4  -5    1.34    1.31
   7   4  -5    0.47    1.05
  -7   4   5   -0.33    1.49
   7  -4   5   -1.36    1.49
   7   4  -5   -1.90    1.24
   7  -4  -5    1.26    0.99
   7   4   5    1.55    1.10
  -7   4  -5   -1.88    1.21
   7   4   5    1.84    1.42
   7  -4  -5   -1.13    1.17
   7  -5   5   -0.12    1.32
  -7   5   5    2.06    1.88
  -7  -5  -5   -0.29    1.27
  -7  -5  -5   -0.95    1.46
   7   5  -5    1.42    1.74
   7   5  -5   -1.15    1.31
   7  -5  -5   -1.59    1.11
   7   5   5   -1.52    1.27
  -7   5  -5   -0.96    1.30
   7  -5  -5    0.89    1.18
  -7   5  -5    1.05    1.29
   7   5   5    0.05    1.25
   7  -6   5    0.84    1.58
  -7   6   5    2.49    2.01
   7   6  -5    1.04    1.40
  -7  -6  -5   -0.71    1.51
   7   6  -5    6.34    2.11
  -7   6  -5    4.19    1.51
  -7   6  -5    1.48    1.91
   7   6   5   -0.28    1.54
   7  -6  -5    3.20    1.56
   7  -6  -5    1.85    1.32
   7   7  -5   -1.93    2.48
   7  -7   5   -1.86    1.91
  -7  -7  -5    0.45    1.63
   7   7  -5   -3.01    2.07
  -7   7   5    0.26    2.88
   7  -7  -5    1.24    1.51
  -7   7  -5   -0.55    2.37
  -7   7  -5   -1.34    1.59
   7  -7  -5   -0.65    1.44
   7   0  -6   12.56    1.36
   7   0   6   12.33    2.09
   7   0  -6   15.73    1.71
   7   0  -6   13.71    1.86
  -7   0   6   15.72    2.54
  -7   0  -6    9.99    1.80
  -7   0  -6   15.34    2.12
  -7  -1  -6  199.77    7.81
   7  -1   6  184.18    7.80
  -7  -1  -6  186.22    7.52
  -7   1   6  193.42    8.54
   7   1  -6  191.67    6.03
   7   1  -6  186.21    7.33
   7  -1  -6  191.71    6.68
  -7   1  -6  188.89    7.65
  -7   1  -6  177.73    7.27
  -7  -1   6  192.88    8.62
   7  -1  -6  185.96    6.06
   7  -1  -6  186.14    7.11
   7   1   6  193.13    7.64
   7  -2   6    5.99    1.76
  -7  -2  -6    8.66    1.97
  -7   2   6    6.45    1.93
   7   2  -6    7.36    1.52
  -7  -2  -6    8.76    1.92
   7   2  -6    6.88    1.21
   7   2   6    6.68    1.72
   7  -2  -6    5.57    1.34
  -7  -2   6   11.08    2.37
  -7   2  -6    7.52    1.72
  -7   2  -6    7.85    1.62
   7  -2  -6    6.24    1.51
   7  -2  -6    7.15    1.18
   7  -3   6  161.79    7.53
   7   3  -6  166.43    7.23
  -7  -3  -6  171.31    7.40
  -7   3   6  165.44    8.41
  -7  -3  -6  176.17    7.80
   7   3  -6  163.47    5.80
   7  -3  -6  170.80    6.67
   7  -3  -6  162.51    6.75
  -7   3  -6  163.72    7.33
   7   3   6  172.01    7.20
   7  -3  -6  171.72    6.11
  -7   3  -6  168.63    6.63
   7   4  -6    5.18    1.90
  -7  -4  -6    2.14    1.59
   7  -4   6    5.12    1.81
  -7  -4  -6    1.48    1.30
   7   4  -6   -0.25    1.31
  -7   4   6   -1.84    2.00
   7  -4  -6    2.45    1.08
   7  -4  -6    1.03    1.15
   7   4   6    6.21    1.69
  -7   4  -6    2.66    1.45
  -7   4  -6    2.62    1.20
   7   5  -6  116.78    6.24
   7   5  -6  115.31    5.52
  -7   5   6  125.01    7.50
  -7  -5  -6  119.05    6.55
   7  -5   6  109.45    6.54
  -7  -5  -6  131.85    6.45
   7  -5  -6  111.25    5.69
  -7   5  -6  114.30    6.21
  -7   5  -6  117.10    5.49
   7   5   6  116.09    5.93
   7  -5  -6  114.84    5.46
   7  -6   6    6.30    2.22
  -7  -6  -6    5.30    2.19
  -7  -6  -6    1.57    1.81
  -7   6   6    0.39    2.57
   7   6  -6    7.13    2.41
   7  -6  -6    3.95    1.56
   7  -6  -6    4.04    1.63
  -7   6  -6    0.98    1.91
   7   0  -7    1.43    1.04
   7   0  -7    0.53    1.14
  -7   0  -7    1.29    1.18
   7   0   7   -0.11    1.21
  -7   0   7    2.20    1.65
  -7   0  -7   -0.98    1.18
  -7  -1  -7    1.19    1.14
   7  -1   7   -0.17    1.16
  -7   1   7   -0.56    1.60
   7   1  -7    1.39    1.18
  -7  -1  -7    1.37    1.16
  -7  -1   7   -0.41    1.38
   7  -1  -7    0.21    0.66
   7  -1  -7   -0.01    0.98
  -7   1  -7   -1.94    1.38
  -7   1  -7    2.91    1.34
   7  -1  -7   -0.59    1.39
   7  -2   7    2.59    1.60
  -7  -2  -7    3.06    1.47
  -7  -2  -7    0.57    1.32
  -7   2   7   -0.30    1.55
   7  -2  -7    3.18    1.43
   7  -2  -7    3.30    1.53
   7  -2  -7    3.17    1.47
  -7  -2   7    1.31    1.65
  -7   2  -7   -0.97    1.24
  -7   2  -7   -1.15    1.01
   7   2   7    1.32    1.33
  -7   3   7    0.69    1.82
  -7  -3  -7    0.32    1.52
   7   3  -7    1.88    1.36
  -7  -3  -7   -0.47    1.47
   7  -3   7    2.83    1.82
  -7  -3   7    0.82    1.76
   7  -3  -7    0.84    0.84
   7  -3  -7    0.78    1.22
   7  -3  -7   -2.21    1.28
  -7   3  -7   -1.65    1.36
  -7   3  -7   -0.46    0.99
   7   3   7    1.68    1.42
  -7  -4  -7   -0.48    1.59
  -7   4   7   -1.00    1.97
  -7  -4  -7    3.86    1.67
   7   4  -7   -0.89    1.36
   7  -4   7    3.36    1.78
   7  -4  -7   -0.74    1.29
   7  -4  -7    0.23    1.21
  -7   4  -7    1.25    1.43
  -7   4  -7    0.05    1.04
   7   4   7   -0.51    1.33
  -7   5   7    2.32    2.66
  -7  -5  -7   -1.27    2.02
  -7  -5  -7   -1.42    1.62
   7   5  -7    1.57    2.01
   7  -5   7    0.71    1.70
  -7   5  -7    1.00    1.44
  -7   5  -7    0.28    1.17
   7  -5  -7    0.77    1.32
   7  -5  -7    1.77    1.28
   7   5   7   -2.86    1.77
   7   0  -8    2.94    1.42
  -7   0  -8    2.49    1.54
  -7   0  -8    3.90    1.41
   7   0   8    1.63    1.43
  -7   0   8   -0.06    1.62
   7  -1   8  107.45    6.17
  -7   1   8  100.15    6.50
  -7  -1  -8   93.46    4.75
  -7  -1  -8  108.51    5.70
   7   1  -8   96.66    5.50
   7  -1  -8   90.18    5.33
  -7   1  -8   98.45    4.60
   7   1   8  103.73    5.99
   7  -1  -8  102.03    5.08
  -7   1  -8  107.46    5.81
  -7  -1   8  102.49    6.75
  -7  -2  -8    7.44    1.95
  -7  -2  -8    4.70    1.68
   7   2  -8    7.02    1.78
   7  -2   8    6.44    1.99
  -7   2   8   -1.42    2.54
  -7   2  -8    6.35    1.84
   7  -2  -8    2.78    1.71
  -7  -2   8    3.25    2.00
  -7   2  -8    2.28    1.50
   7   2   8    2.13    1.58
   7  -2  -8    5.66    2.20
  -7   3   8   80.82    6.09
   7   3  -8   88.06    5.42
  -7  -3  -8   85.74    5.15
  -7  -3  -8   86.65    5.35
   7  -3   8   82.29    5.67
  -7  -3   8   83.18    6.31
   7   3   8   85.73    5.56
   7  -3  -8   81.31    5.20
  -7   3  -8   82.75    5.45
   7  -3  -8   83.42    4.99
  -7  -4  -8    8.29    2.58
  -7  -4  -8    5.73    2.08
  -7   4   8    8.30    2.59
   7   4  -8    6.53    1.90
   7  -4   8    6.16    2.19
   7   4   8    8.46    2.39
  -7  -4   8    4.23    2.13
   7  -4  -8    6.58    1.99
  -7   4  -8    4.71    2.54
  -7   0  -9   -1.61    1.58
   7   0   9   -0.11    1.66
  -7   0   9    1.11    1.73
   7   0  -9   -1.17    1.44
   7  -1   9   -0.08    1.56
  -7   1   9   -3.38    2.95
  -7  -1  -9    0.88    1.61
   7   1  -9   -2.85    1.57
  -7   1  -9    0.17    1.52
  -7  -1   9   -4.74    2.35
   7  -1  -9   -0.20    1.66
   7  -1  -9    0.04    3.35
   7   1   9    3.41    1.77
   7  -2   9    0.43    1.53
  -7  -2  -9    2.38    2.64
   7   2  -9   -1.03    2.37
  -7   2   9    1.93    3.80
   7  -2  -9    1.46    1.78
  -7  -2   9    1.04    2.84
  -7   2  -9   -1.84    2.58
   7  -2  -9    1.57    2.27
   7   2   9    3.31    2.28
   8   0   0  387.29   10.45
  -8   0   0  370.34   11.70
  -8   0   0  397.14   11.11
   8   0   0  383.16   11.86
  -8   1   0   14.29    2.16
  -8   1   0   16.83    1.67
  -8  -1   0   14.57    1.77
   8   1   0   14.06    2.13
  -8  -1   0   16.60    2.15
   8  -1   0   16.63    1.85
  -8   1   0   16.79    1.97
   8  -1   0   12.93    2.07
   8   1   0   17.59    1.67
   8  -2   0  284.44    9.07
  -8   2   0  308.07   10.67
  -8  -2   0  309.61   10.59
  -8  -2   0  301.52    9.42
   8   2   0  307.15   10.52
   8  -2   0  305.00    7.67
   8  -2   0  305.03   10.59
  -8   2   0  286.30    8.70
   8   2   0  298.24    8.13
  -8   2   0  295.64    9.66
  -8  -3   0   12.87    1.84
  -8   3   0   12.78    2.10
  -8   3   0    9.91    1.35
  -8  -3   0   11.66    2.13
   8  -3   0   11.34    2.13
   8   3   0   10.57    2.03
   8  -3   0   10.24    1.62
  -8   3   0   15.45    2.36
   8   3   0   11.46    1.22
   8  -4   0  193.06    8.10
  -8   4   0  189.18    8.08
   8  -4   0  194.57    7.50
  -8   4   0  196.53    7.98
   8   4   0  191.36    8.25
  -8  -4   0  193.72    8.34
  -8   5   0    9.31    1.98
   8  -5   0    5.78    1.56
  -8  -5   0    5.42    1.75
   8   5   0    4.70    1.67
   8  -5   0    6.33    1.71
  -8   5   0    5.54    1.68
   8   6   0  141.58    7.30
  -8   6   0  145.40    7.23
   8  -6   0  134.76    7.07
  -8  -6   0  139.55    7.30
   8  -6   0  139.39    6.88
  -8   7   0    6.69    1.94
   8  -7   0    6.13    2.01
   8  -7   0    3.63    1.70
  -8  -7   0    4.89    1.91
   8   7   0    5.11    1.96
  -8   0  -1   -0.13    1.04
   8   0   1   -0.57    0.93
  -8   0   1    0.32    1.04
  -8   0  -1   -0.37    0.79
   8   0  -1    2.44    1.16
  -8   0  -1    0.80    0.72
  -8   0   1    0.34    0.94
   8   0   1   -0.59    1.15
  -8   1   1   -1.32    1.11
  -8   1   1    0.46    0.63
   8  -1   1    1.52    1.18
   8   1  -1   -1.05    1.08
   8   1  -1    0.62    0.67
   8  -1   1    0.43    0.96
  -8  -1  -1    0.59    1.10
  -8   1   1    0.92    1.12
   8  -1  -1    0.83    0.59
  -8   1  -1    1.12    0.87
  -8   1  -1    0.38    0.71
   8  -1  -1    0.43    1.07
   8   1   1    0.85    0.91
  -8  -1   1    0.67    0.96
   8   1   1    0.60    1.15
   8  -1  -1   -0.39    0.80
  -8   1  -1    0.14    1.10
   8   2  -1    0.65    0.61
  -8  -2  -1    2.65    0.97
  -8   2   1    2.51    1.34
  -8   2   1    0.40    0.65
   8   2  -1   -0.82    1.20
  -8   2   1    1.38    1.19
  -8  -2  -1    1.54    1.18
   8  -2   1    1.45    1.06
   8  -2   1    2.15    1.36
   8   2   1   -0.52    1.08
   8  -2  -1    0.30    1.00
  -8  -2   1    0.48    0.96
   8   2   1   -0.90    0.92
   8  -2  -1    0.78    0.61
  -8   2  -1    0.39    0.81
  -8   2  -1    0.22    0.96
  -8  -2   1    1.56    1.19
   8  -2  -1    1.34    0.96
  -8   2  -1    1.04    1.30
  -8   3   1    0.41    1.12
  -8  -3  -1    1.38    0.95
  -8  -3  -1    3.48    1.49
   8  -3   1   -1.49    1.26
  -8   3   1    1.35    1.26
   8  -3   1    1.28    1.06
   8   3  -1    0.97    1.25
  -8   3  -1    1.10    0.87
   8  -3  -1    0.62    0.92
   8  -3  -1   -0.13    1.14
  -8   3  -1    0.22    1.11
   8   3   1    1.23    1.34
  -8   3  -1    0.40    0.95
   8   3   1   -0.14    0.81
  -8  -3   1    1.37    1.23
  -8  -3   1    1.06    1.17
   8   4  -1   -2.37    1.42
  -8   4   1    0.60    1.08
  -8  -4  -1    1.65    1.27
   8  -4   1    1.43    1.05
  -8  -4  -1    2.08    1.04
  -8   4   1   -0.98    1.52
   8  -4  -1    0.21    1.08
  -8   4  -1   -0.79    0.86
   8   4   1   -1.49    1.27
   8  -4  -1   -0.45    0.98
  -8   4  -1    0.69    1.17
  -8  -4   1   -0.28    1.20
  -8   4  -1    0.45    0.94
   8  -5   1    1.88    1.20
  -8  -5  -1   -0.09    1.15
   8   5  -1    3.38    1.53
  -8   5   1   -0.51    1.35
  -8   5   1    0.46    1.09
   8  -5   1    0.30    1.22
   8  -5  -1    1.40    1.14
  -8   5  -1    0.04    1.07
   8   5   1    2.06    1.32
  -8  -5   1   -0.93    1.24
   8  -5  -1    0.11    1.01
  -8   6   1   -0.73    1.43
   8  -6   1   -0.82    1.49
   8  -6   1   -1.09    1.40
  -8  -6  -1    0.42    1.41
  -8   6   1    0.91    1.66
   8   6  -1   -1.71    1.49
  -8   6  -1   -0.79    1.37
  -8  -6   1    2.93    1.56
   8   6   1    1.25    1.44
   8  -6  -1    1.84    1.47
   8  -6  -1    1.55    1.38
   8  -7   1   -2.57    1.78
   8   7  -1    3.80    1.84
   8  -7   1   -1.34    1.67
  -8  -7  -1   -0.44    1.46
  -8   7   1    0.85    1.93
   8   7   1   -0.13    1.44
   8  -7  -1   -2.21    1.59
  -8  -7   1    2.63    3.83
   8  -7  -1    0.66    1.31
  -8   7  -1   -0.54    1.49
   8   0   2  223.40    7.60
   8   0  -2  227.95    8.26
   8   0  -2  215.72    6.99
   8   0   2  222.99    8.58
  -8   0   2  217.58    7.93
  -8   0  -2  217.47    6.76
   8   0  -2  222.47    6.85
  -8   0  -2  219.38    7.58
  -8   0  -2  217.04    8.32
  -8   0   2  224.10    8.20
  -8  -1  -2   10.99    1.73
  -8  -1  -2   11.13    1.33
  -8  -1  -2   12.19    1.99
   8  -1   2   10.23    1.89
  -8   1   2   12.45    1.98
  -8   1   2    9.07    1.19
   8   1  -2   11.79    1.93
   8   1  -2   10.44    1.24
   8  -1   2   12.01    1.79
  -8   1   2   11.38    1.87
   8   1   2    9.94    1.63
   8   1   2   12.03    2.00
   8  -1  -2   12.44    1.92
   8  -1  -2   14.27    1.50
  -8   1  -2   12.88    1.55
   8  -1  -2   11.47    1.50
  -8  -1   2    9.96    1.83
  -8   1  -2   12.32    2.08
  -8  -1   2   12.86    1.92
  -8   1  -2   12.13    1.73
   8  -2   2  247.77    8.56
   8  -2   2  244.89    9.49
  -8   2   2  251.47    9.35
   8   2  -2  243.37    8.93
  -8  -2  -2  242.41    7.23
   8   2  -2  227.84    6.50
  -8  -2  -2  232.11    9.05
  -8   2   2  227.70    8.89
  -8   2  -2  243.15    7.80
  -8   2  -2  243.28    8.45
  -8  -2   2  237.29    8.74
   8   2   2  239.01    9.35
  -8   2  -2  238.58    9.28
   8  -2  -2  252.28    7.23
  -8  -2   2  256.78    9.07
   8  -2  -2  240.91    7.95
   8  -2  -2  251.56    9.20
   8   2   2  239.06    7.62
   8  -3   2    8.73    1.77
  -8   3   2   10.46    1.82
   8   3  -2   11.45    2.08
  -8  -3  -2   10.60    1.46
  -8   3   2   10.57    2.18
   8  -3   2   13.39    2.34
  -8  -3  -2    8.92    1.98
   8  -3  -2   12.36    1.78
  -8  -3   2    9.48    1.95
   8  -3  -2   11.68    1.91
  -8   3  -2   11.18    2.15
  -8   3  -2   11.87    1.71
   8   3   2   11.47    2.17
  -8  -3   2   10.96    1.88
   8   3   2   13.06    1.61
  -8   3  -2   10.68    1.70
   8  -4   2  214.61    8.33
  -8   4   2  212.00    8.55
  -8  -4  -2  217.55    9.08
   8   4  -2  215.94    8.88
  -8   4   2  230.66    9.57
   8  -4   2  220.17    9.02
   8  -4  -2  220.46    8.63
  -8   4  -2  222.74    7.72
  -8  -4   2  217.95    8.93
  -8   4  -2  230.34    9.06
   8  -4  -2  222.73    8.24
   8   4   2  209.63    8.96
  -8   5   2   11.07    2.10
   8  -5   2    7.86    1.78
   8   5  -2    9.01    2.14
  -8  -5  -2   10.38    2.17
  -8   5   2    8.19    2.24
   8  -5   2   11.07    2.18
  -8   5  -2   12.95    1.79
   8  -5  -2    9.05    1.80
  -8   5  -2    8.71    1.99
   8  -5  -2    7.42    1.79
   8   5   2   11.95    2.26
  -8  -5   2    9.42    2.12
   8  -6   2  120.63    6.72
   8   6  -2  129.78    6.79
   8  -6   2  117.63    6.35
  -8   6   2  113.84    6.49
  -8  -6  -2  120.74    6.85
  -8   6   2  127.36    7.26
   8  -6  -2  127.12    6.48
   8  -6  -2  126.99    6.65
  -8   6  -2  133.03    6.88
  -8  -6   2  128.88    6.91
   8   6   2  130.22    7.03
   8   7  -2    3.30    1.79
   8  -7   2    4.79    1.92
   8  -7   2    1.88    1.70
  -8   7   2    3.32    2.45
  -8  -7  -2    5.06    2.05
  -8   7  -2    6.70    1.98
   8  -7  -2    6.95    2.03
   8  -7  -2    7.36    2.04
   8   7   2    5.27    2.08
  -8   0  -3   -1.51    1.12
  -8   0  -3   -0.85    0.96
   8   0  -3   -0.22    0.98
   8   0  -3   -0.86    0.72
   8   0   3   -0.69    1.15
  -8   0   3   -0.58    1.00
   8   0   3    1.08    1.03
  -8   0   3    2.07    1.17
  -8   0  -3   -0.10    0.65
   8   0  -3    1.27    0.74
   8   0  -3   -1.17    0.74
   8   1  -3    0.28    0.81
  -8   1   3    0.71    1.11
   8   1  -3   -0.83    1.10
  -8  -1  -3   -1.33    0.97
  -8   1   3   -1.42    1.20
  -8  -1  -3    1.71    1.24
   8  -1   3   -0.38    1.12
   8   1  -3    0.12    0.56
   8   1  -3    2.08    0.83
  -8   1  -3    0.86    1.22
  -8   1  -3    1.79    1.11
   8   1   3    1.99    1.03
  -8   1  -3    0.79    0.77
   8  -1  -3    1.21    1.04
   8   1   3    1.89    1.31
   8  -1  -3    0.84    0.81
   8  -1  -3    0.92    0.85
  -8  -1   3    2.44    1.31
  -8  -1   3    1.82    1.11
   8   2  -3    2.01    1.29
   8   2  -3    1.12    0.83
   8  -2   3    0.09    1.25
   8  -2   3   -0.02    1.09
  -8   2   3    0.94    1.10
  -8  -2  -3    2.89    1.37
  -8   2   3   -0.40    1.21
  -8  -2  -3   -0.21    1.05
  -8   2  -3    1.62    1.15
  -8   2  -3    0.18    0.77
  -8  -2   3    1.49    1.23
   8   2   3    3.25    1.21
   8   2   3    0.64    1.10
   8  -2  -3   -0.23    0.76
  -8  -2   3    1.00    1.14
  -8   2  -3    1.60    1.19
   8  -2  -3    0.82    0.77
  -8   3   3   -2.37    1.25
  -8  -3  -3   -0.89    1.36
   8  -3   3   -1.23    1.41
   8   3  -3   -0.13    0.80
   8   3  -3   -0.18    1.30
   8  -3   3    2.33    1.42
  -8   3   3    3.20    1.58
   8  -3  -3    1.49    1.18
   8   3   3    0.09    1.14
  -8   3  -3   -0.69    1.00
  -8   3  -3    1.46    1.40
   8   3   3   -0.27    0.78
  -8  -3   3    0.65    1.20
   8  -3  -3   -0.02    0.93
  -8  -3   3   -1.08    1.19
   8  -4   3    1.69    1.44
  -8  -4  -3    1.80    1.54
  -8   4   3   -0.41    1.42
   8   4  -3    0.81    1.43
  -8   4   3    1.55    1.24
   8   4   3    0.30    1.30
  -8   4  -3    0.72    1.37
   8  -4  -3    2.22    1.20
  -8  -4   3    2.71    1.92
   8  -4  -3   -1.14    1.15
  -8   4  -3    0.87    1.07
   8  -5   3   -0.11    1.21
  -8   5   3   -1.39    1.81
   8   5  -3    1.29    1.42
   8  -5   3   -1.04    1.41
  -8  -5  -3    0.72    1.28
  -8   5   3    0.05    1.21
  -8   5  -3   -0.33    1.11
   8  -5  -3    1.72    1.25
   8   5   3   -0.03    1.19
   8  -6   3   -1.32    1.60
   8   6  -3    2.35    1.59
   8   6  -3    2.12    1.55
  -8   6   3    4.17    2.12
  -8  -6  -3    2.50    1.82
   8  -6   3   -0.79    1.60
  -8   6   3   -0.20    1.22
   8  -6  -3    0.35    1.33
  -8   6  -3    0.68    1.41
   8  -6  -3    2.62    1.47
   8   6   3   -1.49    1.70
  -8   6  -3    2.45    1.81
   8   7  -3   -4.43    2.45
  -8   7   3   -1.88    2.13
   8  -7   3    0.32    1.52
   8   7  -3    1.88    2.16
  -8  -7  -3    3.86    1.92
  -8   7   3    0.67    3.06
   8   7   3   -2.15    1.77
   8  -7  -3   -0.61    1.39
   8  -7  -3    0.82    1.82
  -8   7  -3   -1.08    1.67
  -8   0  -4  276.67    9.44
   8   0  -4  283.33    8.99
  -8   0   4  272.27    8.94
   8   0  -4  264.65    8.80
   8   0   4  260.40    9.62
  -8   0   4  279.41   10.12
   8   0  -4  287.66    7.92
  -8   0  -4  264.60    9.48
   8   0   4  278.96    9.35
  -8  -1  -4   13.17    1.92
   8   1  -4   13.85    1.84
  -8   1   4   15.65    2.06
   8  -1   4   14.61    2.12
  -8   1   4   12.03    2.14
   8  -1   4   10.61    2.08
  -8  -1  -4   11.46    1.99
   8   1  -4   12.34    1.80
  -8  -1   4    9.33    1.59
   8  -1  -4   10.05    1.44
   8  -1  -4   13.41    1.57
  -8   1  -4   14.75    2.30
   8  -1  -4    7.93    1.60
  -8   1  -4   13.15    2.00
   8  -1  -4   10.67    1.59
   8   1   4   11.47    2.12
  -8  -1   4   12.67    2.28
   8   1   4   13.71    1.89
   8  -2   4  215.30    8.83
   8  -2   4  224.66    8.55
  -8  -2  -4  226.42    9.00
  -8  -2  -4  221.53    8.28
   8   2  -4  229.66    8.14
  -8   2   4  223.18    7.99
   8   2  -4  220.54    7.96
  -8   2   4  224.40    9.18
  -8   2  -4  223.56    8.89
   8   2   4  221.19    7.84
  -8  -2   4  217.10    9.00
   8  -2  -4  225.77    7.42
   8   2   4  224.66    9.25
   8  -2  -4  218.84    7.85
   8  -2  -4  236.21    7.76
  -8   2  -4  239.60    8.67
   8  -2  -4  223.49    7.59
  -8   3   4    7.04    1.52
  -8  -3  -4    9.86    2.06
   8   3  -4   10.32    1.76
   8  -3   4    6.57    1.79
   8   3  -4    7.73    1.72
  -8   3   4    9.79    2.21
   8  -3   4    5.89    1.82
  -8  -3  -4    5.12    1.60
   8   3   4   10.40    1.63
  -8  -3   4    9.17    2.08
  -8   3  -4   10.52    2.14
   8  -3  -4    5.21    1.42
   8  -3  -4    8.20    1.55
   8   3   4    6.80    1.82
  -8   3  -4    5.15    1.50
   8  -3  -4    9.55    1.70
   8  -4   4  141.74    6.83
   8   4  -4  142.39    6.64
   8   4  -4  142.96    6.67
  -8   4   4  140.58    6.45
  -8   4   4  146.64    7.85
  -8  -4  -4  139.87    7.29
   8  -4   4  143.06    6.83
   8   4   4  143.86    5.92
   8  -4  -4  147.93    6.38
  -8   4  -4  149.24    6.68
   8   4   4  148.46    7.42
  -8   4  -4  148.54    6.87
   8  -4  -4  142.08    6.39
   8  -4  -4  145.81    6.11
  -8  -5  -4    6.72    1.93
  -8   5   4    5.32    2.29
   8  -5   4    4.61    1.93
  -8   5   4    5.46    1.83
   8   5  -4    8.98    2.06
   8   5  -4    5.50    1.62
  -8   5  -4    6.27    1.75
   8  -5  -4    7.70    1.65
  -8   5  -4    2.97    1.61
   8  -5  -4    6.80    1.68
   8   5   4    4.04    1.79
  -8   6   4   98.95    6.85
   8   6  -4  104.01    5.97
   8  -6   4   93.77    5.98
  -8  -6  -4   97.20    6.38
   8   6  -4  103.18    6.03
   8   6   4  100.62    6.47
  -8   6  -4   92.66    5.42
   8  -6  -4  105.12    5.64
  -8   6  -4  101.09    5.81
   8  -6  -4  101.13    5.77
   8  -7   4    6.03    2.16
  -8  -7  -4    6.95    2.34
   8   7  -4    4.46    2.50
  -8   7   4   -0.94    3.60
   8   7  -4    5.26    2.23
   8  -7  -4    3.69    1.84
  -8   7  -4    6.53    2.10
   8  -7  -4    1.49    1.78
   8   7   4    2.35    2.36
   8   0  -5    0.74    0.95
  -8   0  -5   -0.46    1.01
   8   0   5   -1.50    1.30
   8   0  -5    0.20    0.93
  -8   0   5    0.22    1.19
  -8   0  -5   -0.51    1.13
   8   0  -5   -0.74    0.84
  -8  -1  -5    1.36    1.10
   8  -1   5    0.66    1.35
  -8   1   5   -0.30    1.31
   8  -1   5   -1.67    1.27
   8   1  -5    1.36    1.04
   8   1  -5   -1.56    1.00
  -8  -1  -5   -1.11    1.26
   8  -1  -5    0.85    0.91
   8  -1  -5    0.32    0.83
  -8  -1   5   -0.22    1.24
   8   1   5   -0.41    1.19
  -8   1  -5    0.32    1.03
   8   1   5   -1.22    1.25
  -8   1  -5    0.21    1.14
   8  -1  -5    0.14    0.85
  -8   2   5    0.25    1.19
   8  -2   5    0.76    1.36
  -8  -2  -5    1.05    1.17
  -8  -2  -5   -1.62    1.53
   8   2  -5    1.75    1.12
   8   2  -5    0.07    1.68
   8   2   5    0.16    1.26
  -8   2  -5    0.83    1.15
  -8   2  -5    3.55    1.51
   8   2   5    0.71    1.18
   8  -2  -5   -0.08    0.89
   8  -2  -5   -0.04    0.93
  -8  -2   5   -0.84    1.47
   8  -2  -5    0.78    1.01
   8   3  -5   -1.35    1.08
   8  -3   5   -1.19    1.42
   8   3  -5    0.15    1.06
  -8   3   5   -0.78    1.44
  -8  -3  -5    0.95    1.35
  -8  -3  -5   -1.38    1.60
  -8  -3   5   -0.21    1.34
   8   3   5    3.01    1.73
  -8   3  -5    1.92    1.50
   8  -3  -5    2.36    1.09
  -8   3  -5    0.10    1.19
   8   3   5    0.16    1.00
   8  -3  -5   -1.12    1.04
   8  -4   5   -0.41    1.54
  -8   4   5    0.56    1.68
   8   4  -5   -1.27    1.33
  -8  -4  -5    0.56    1.42
  -8  -4  -5   -1.13    1.40
   8   4  -5   -1.15    1.61
   8   4   5    1.41    1.27
  -8   4  -5   -2.15    1.64
  -8   4  -5    0.21    1.29
   8   4   5    0.08    1.63
   8  -4  -5    0.57    1.22
   8  -4  -5   -0.61    1.30
   8   5  -5    0.54    1.52
  -8  -5  -5    0.71    1.76
   8   5  -5   -1.57    1.33
   8  -5   5    2.96    1.77
  -8   5   5    1.51    2.14
  -8  -5  -5    0.94    1.71
   8   5   5    5.68    2.18
  -8   5  -5    0.30    1.74
   8  -5  -5   -0.41    1.19
  -8   5  -5    2.56    1.46
   8  -5  -5   -0.69    1.52
  -8  -6  -5   -1.20    2.53
   8   6  -5    1.97    2.33
   8   6  -5    0.68    1.93
   8  -6   5    3.47    1.94
  -8  -6  -5    1.02    1.69
  -8   6   5    2.57    2.47
  -8   6  -5    0.08    1.89
   8   6   5    1.65    2.48
   8  -6  -5    1.62    1.50
   8  -6  -5   -0.47    1.41
  -8   6  -5    0.56    1.52
  -8   0   6  125.07    6.89
   8   0  -6  125.51    5.88
   8   0  -6  125.66    5.11
   8   0  -6  119.41    4.87
  -8   0  -6  127.89    6.32
   8   0   6  129.78    6.40
  -8   0  -6  132.07    6.20
   8   1  -6    7.54    1.62
   8  -1   6    3.83    1.64
   8   1  -6    6.53    1.30
  -8  -1  -6    3.96    1.54
  -8  -1  -6    8.17    1.84
  -8   1   6    8.12    2.14
   8   1   6    7.18    1.78
   8  -1  -6    7.72    1.36
  -8   1  -6   10.56    1.98
   8  -1  -6    6.92    1.48
   8  -1  -6    7.26    1.65
  -8  -1   6    4.47    1.85
  -8  -2  -6  135.97    6.71
  -8   2   6  141.98    7.38
   8   2  -6  136.16    6.29
   8   2  -6  127.27    5.13
  -8  -2  -6  133.90    6.49
   8  -2   6  131.91    6.79
   8   2   6  132.68    6.32
   8  -2  -6  127.02    5.67
  -8  -2   6  127.61    7.41
   8  -2  -6  124.74    5.15
   8  -2  -6  131.67    6.14
  -8   2  -6  137.41    6.76
  -8   2  -6  128.23    6.29
  -8   3   6    5.61    2.09
   8   3  -6    4.83    1.32
  -8  -3  -6    4.50    1.72
   8   3  -6    3.86    1.59
  -8  -3  -6    5.73    1.93
   8  -3  -6    8.52    1.68
  -8  -3   6    4.89    2.01
   8  -3  -6    5.28    1.29
  -8   3  -6    7.54    1.71
   8   3   6    8.39    1.82
  -8   3  -6    3.53    1.61
   8  -4   6  118.93    6.68
  -8   4   6  120.39    7.53
  -8  -4  -6  117.84    6.80
   8   4  -6  121.31    6.37
  -8  -4  -6  121.17    6.29
   8   4  -6  118.29    5.33
  -8   4  -6  114.10    6.35
   8   4   6  121.65    6.17
   8  -4  -6  120.64    5.87
   8  -4  -6  117.45    5.47
  -8   4  -6  124.82    6.06
   8  -5   6    5.65    1.97
  -8  -5  -6    2.84    1.88
  -8   5   6    7.64    2.71
   8   5  -6    2.98    1.57
  -8  -5  -6    7.11    2.27
   8   5  -6    4.19    1.79
   8   5   6    8.53    2.83
   8  -5  -6    7.03    1.77
  -8   5  -6    4.42    1.80
   8  -5  -6    6.44    1.83
  -8   5  -6    2.72    2.33
   8   0  -7   -0.83    1.14
  -8   0  -7    3.72    1.49
   8   0   7    0.53    1.38
  -8   0   7   -0.60    1.52
  -8   0  -7    0.50    1.21
   8   1  -7    1.72    1.34
  -8  -1  -7    4.36    1.77
  -8   1   7   -1.05    1.75
   8  -1   7    0.59    1.42
  -8  -1  -7    3.06    1.38
   8   1   7   -0.68    1.36
   8  -1  -7    0.37    1.37
  -8   1  -7    1.67    1.42
  -8   1  -7    1.77    1.45
  -8  -1   7   -3.84    1.94
   8  -1  -7    0.05    0.96
   8  -1  -7    1.55    0.97
  -8   2   7   -2.62    1.91
  -8  -2  -7   -2.19    1.59
  -8  -2  -7    3.39    1.61
   8  -2   7    0.36    1.54
   8   2  -7    1.06    1.29
   8  -2  -7   -0.41    1.28
  -8   2  -7   -0.54    1.54
   8  -2  -7   -2.15    1.35
   8   2   7    0.87    1.28
   8  -2  -7    0.75    0.91
  -8  -2   7   -1.99    1.82
  -8   2  -7    2.44    1.80
  -8   3   7    0.93    1.78
   8  -3   7    1.70    1.79
   8   3  -7    1.02    1.39
  -8  -3  -7    0.38    2.82
  -8  -3  -7    0.21    1.36
   8  -3  -7    2.41    1.54
  -8   3  -7   -2.24    1.51
  -8   3  -7    4.18    1.83
  -8  -3   7    2.92    2.18
   8  -3  -7    0.72    1.00
   8   3   7    0.75    1.52
   8  -4   7    0.42    1.68
   8   4  -7   -3.27    1.68
  -8  -4  -7    0.45    2.26
  -8   4   7   -4.08    2.42
  -8  -4  -7   -0.26    1.48
  -8  -4   7    1.24    1.83
   8  -4  -7    2.82    2.19
  -8   4  -7   -1.13    2.12
   8   4   7    1.76    2.14
   8  -4  -7   -0.21    1.36
  -8   4  -7    1.69    2.64
  -8   0  -8  109.57    6.17
   8   0  -8  112.68    6.07
  -8   0  -8  105.69    5.36
  -8   0   8  111.37    6.94
   8   0   8  109.70    6.40
  -8  -1  -8    8.97    2.02
  -8   1   8    3.59    2.04
  -8  -1  -8    3.81    1.65
   8  -1   8    4.86    2.05
   8   1  -8    3.27    1.65
   8  -1  -8    2.56    1.51
  -8   1  -8    2.03    1.45
   8   1   8    4.42    1.84
  -8   1  -8    4.05    1.79
  -8  -1   8    4.98    2.33
   8   2  -8   92.23    5.60
  -8   2   8   81.96    6.00
   8  -2   8   90.33    5.98
  -8  -2  -8   86.39    5.10
  -8  -2  -8  100.18    5.94
  -8   2  -8   91.13    5.68
  -8  -2   8   91.46    6.65
   8   2   8   92.03    5.75
   8  -2  -8   84.86    5.38
   8  -2  -8   82.10    4.96
  -8   2  -8   82.12    4.43
   8  -3   8    5.22    2.15
   8   3  -8    0.46    2.37
  -8  -3  -8    5.37    2.11
  -8  -3  -8    2.42    3.15
  -8   3   8    2.90    2.18
   8   3   8    0.33    1.69
  -8   3  -8    7.43    3.21
  -8  -3   8    1.25    2.16
   8  -3  -8    3.36    1.84
   9   0   0   85.82    4.15
   9   0   0   87.45    5.01
  -9   0   0   86.25    4.44
  -9   0   0   86.62    4.94
  -9   0   0   84.14    4.22
   9  -1   0  145.18    5.81
  -9  -1   0  144.09    5.91
  -9   1   0  137.93    5.47
  -9   1   0  141.96    6.76
  -9  -1   0  146.13    6.65
  -9   1   0  146.17    6.11
   9   1   0  138.81    5.25
   9   1   0  135.43    6.62
   9  -1   0  133.78    6.59
  -9  -2   0   82.54    5.10
   9  -2   0   78.36    4.25
  -9   2   0   82.74    4.59
   9  -2   0   78.18    4.95
  -9   2   0   78.67    3.88
  -9  -2   0   77.43    4.27
   9   2   0   82.75    3.66
  -9   2   0   76.88    4.95
   9   2   0   80.14    5.05
   9  -3   0  153.54    7.59
  -9  -3   0  143.80    6.17
  -9  -3   0  141.27    7.10
   9   3   0  137.55    7.18
  -9   3   0  141.31    6.61
   9  -3   0  133.56    6.07
  -9   3   0  151.32    7.62
   9  -4   0   70.61    4.44
  -9  -4   0   74.48    4.44
  -9   4   0   76.06    5.33
   9   4   0   69.43    5.15
  -9  -4   0   73.10    5.23
  -9   4   0   74.67    4.94
   9  -4   0   77.99    5.44
   9   5   0   96.75    6.02
   9  -5   0   81.66    5.74
  -9   5   0   83.34    5.82
  -9  -5   0   87.11    5.88
  -9   5   0   99.96    5.91
   9  -5   0   85.21    5.10
   9   6   0   48.05    4.49
   9  -6   0   46.49    4.44
  -9  -6   0   49.23    4.49
  -9   6   0   47.95    4.41
   9  -6   0   46.74    4.01
  -9   7   0   44.75    4.46
   9   7   0   47.05    4.66
   9  -7   0   46.82    4.27
  -9  -7   0   31.49    4.18
   9  -7   0   43.38    4.43
  -9   0  -1   -1.17    0.99
   9   0  -1   -1.62    0.92
   9   0   1   -1.34    1.14
  -9   0  -1   -0.48    0.79
  -9   0   1   -0.95    1.04
  -9   0   1    2.35    1.15
  -9   0  -1    1.65    1.17
   9   0  -1    0.63    1.01
   9   0   1   -0.32    0.96
   9  -1   1   -0.09    1.07
   9   1  -1   -0.84    0.76
  -9  -1  -1    0.61    1.06
  -9   1   1    0.86    1.07
  -9   1   1    0.33    0.78
   9  -1   1    1.97    1.35
  -9   1   1    0.77    0.99
   9   1  -1   -0.59    1.06
  -9  -1  -1   -0.71    0.86
  -9   1  -1    1.59    0.92
   9  -1  -1   -2.29    1.07
   9  -1  -1    0.41    0.99
  -9  -1   1   -1.31    1.12
   9   1   1    0.46    0.98
  -9   1  -1    1.08    1.19
  -9  -1   1    0.74    1.05
   9  -1  -1    0.15    0.59
  -9   1  -1    1.53    1.04
   9   1   1   -0.13    0.97
   9   2  -1    0.85    0.70
  -9  -2  -1   -0.48    0.82
  -9   2   1    1.41    1.17
   9  -2   1   -0.23    1.04
   9  -2   1   -0.13    0.91
  -9   2   1    0.09    1.08
  -9   2   1    0.25    0.69
  -9  -2  -1   -0.50    1.19
   9   2   1   -1.66    1.38
   9  -2  -1    0.02    0.96
  -9  -2   1    3.13    1.40
  -9   2  -1    1.36    1.22
   9  -2  -1    0.03    0.87
  -9  -2   1    0.33    1.04
  -9   2  -1   -2.10    0.97
   9   2   1    0.16    0.94
  -9   2  -1   -1.40    1.01
   9   3  -1    0.75    1.25
  -9   3   1   -0.61    1.37
   9  -3   1    0.62    1.17
  -9   3   1    1.80    1.47
  -9  -3  -1    1.66    1.52
   9  -3   1   -0.14    1.24
  -9  -3  -1    2.24    1.15
   9  -3  -1    0.10    0.92
  -9   3  -1   -0.28    1.32
  -9   3  -1    2.06    1.35
  -9  -3   1    1.34    1.24
  -9   3  -1    0.76    1.02
  -9  -3   1   -1.89    1.48
   9   3   1   -0.07    1.30
   9  -3  -1    0.38    1.37
   9  -4   1    0.85    1.06
  -9   4   1    1.19    1.37
   9   4  -1    3.05    1.58
  -9   4   1   -2.49    1.59
  -9  -4  -1    1.20    1.49
   9  -4   1   -0.62    1.48
   9  -4  -1    2.00    1.50
  -9   4  -1   -0.10    1.36
   9  -4  -1   -0.49    1.18
   9   4   1    1.21    1.41
  -9  -4   1   -1.20    1.27
  -9  -4   1   -0.37    1.30
  -9  -5  -1   -1.96    1.68
   9  -5   1   -1.39    1.35
  -9   5   1   -0.98    1.81
  -9   5   1   -3.45    1.73
   9  -5   1    0.19    1.36
   9   5  -1   -1.37    1.60
  -9  -5   1   -0.02    1.35
  -9   5  -1   -0.01    1.40
   9   5   1   -0.64    1.39
  -9   5  -1   -1.14    1.44
   9  -5  -1   -0.03    1.41
   9  -5  -1   -0.99    1.32
  -9   6   1    4.48    2.27
  -9   6   1   -0.29    1.43
  -9  -6  -1   -2.20    1.83
   9  -6   1    1.42    1.35
   9  -6   1    2.12    1.69
   9   6  -1    1.55    1.67
  -9  -6   1    2.18    1.75
   9  -6  -1    1.26    1.49
  -9   6  -1    2.12    1.66
   9  -6  -1   -0.56    1.36
   9   6   1   -2.23    1.77
  -9   7   1    0.60    1.77
   9   7  -1   -1.66    1.79
  -9  -7  -1    3.47    2.28
   9  -7   1   -1.48    1.82
   9   7   1    1.99    1.98
   9  -7  -1   -0.25    1.72
   9  -7  -1   -1.42    1.63
  -9   7  -1    0.70    2.40
   9   0  -2   83.53    4.06
  -9   0   2   91.00    5.06
   9   0  -2   90.32    4.05
  -9   0  -2   87.93    4.96
  -9   0  -2   89.27    4.02
  -9   0   2   90.39    5.06
   9   0  -2   92.29    5.03
  -9   0  -2   82.26    4.38
   9   0   2   83.13    4.39
   9   0   2   90.61    5.14
   9   1  -2  171.10    7.36
   9  -1   2  170.67    7.78
  -9   1   2  175.10    7.46
   9   1  -2  169.64    6.45
  -9  -1  -2  170.25    6.72
  -9  -1  -2  182.52    7.80
  -9  -1  -2  171.99    5.87
  -9   1   2  175.04    7.40
   9   1  -2  168.82    5.69
  -9   1   2  164.29    5.56
   9  -1   2  191.54    7.17
  -9  -1   2  162.85    7.05
  -9   1  -2  170.47    6.79
   9  -1  -2  175.29    7.44
   9   1   2  170.34    6.48
   9  -1  -2  172.50    6.34
   9   1   2  175.47    7.74
  -9   1  -2  169.17    7.64
  -9   1  -2  179.02    6.27
  -9  -1   2  168.83    7.28
   9  -1  -2  173.15    6.04
   9   2  -2   80.04    4.97
  -9  -2  -2   78.50    5.05
  -9   2   2   75.55    4.81
   9  -2   2   78.67    4.49
  -9   2   2   76.89    5.00
   9  -2   2   74.92    5.01
   9   2   2   78.29    5.15
   9  -2  -2   75.74    4.12
  -9   2  -2   73.54    4.25
   9  -2  -2   78.82    4.98
  -9  -2   2   80.98    4.95
   9   2   2   70.68    3.87
  -9   2  -2   79.32    5.08
  -9   2  -2   79.45    4.14
  -9  -2   2   74.39    4.69
   9  -3   2  117.28    5.92
  -9   3   2  128.38    6.69
  -9  -3  -2  123.24    6.79
  -9   3   2  125.30    6.57
   9  -3   2  127.91    7.11
   9   3  -2  127.27    6.66
  -9   3  -2  130.04    5.93
   9   3   2  125.87    5.21
  -9  -3   2  136.12    6.73
   9  -3  -2  126.12    6.58
  -9  -3   2  129.00    6.41
   9  -3  -2  129.84    5.85
   9   3   2  125.99    6.93
  -9   3  -2  133.99    7.21
  -9   3  -2  129.78    5.79
   9  -4   2   41.25    3.62
  -9  -4  -2   43.14    4.10
  -9   4   2   50.08    4.17
   9  -4   2   48.02    4.29
  -9   4   2   42.14    4.07
   9   4  -2   48.81    4.24
  -9  -4   2   46.02    3.89
   9  -4  -2   50.13    3.70
  -9   4  -2   47.13    4.27
   9   4   2   39.50    3.99
   9  -4  -2   45.81    3.95
  -9   4  -2   44.08    3.35
  -9  -4   2   39.53    3.89
  -9   4  -2   48.31    3.62
  -9  -5  -2   92.74    6.29
  -9   5   2  100.51    6.57
   9   5  -2  100.94    6.20
  -9   5   2   98.65    5.99
   9  -5   2  106.49    6.47
   9  -5   2   95.49    5.70
   9  -5  -2  100.68    5.64
  -9   5  -2   97.66    6.19
  -9  -5   2   89.03    5.95
   9  -5  -2  100.06    6.02
   9   5   2   97.63    6.40
  -9   6   2   32.92    4.00
  -9  -6  -2   27.81    3.60
  -9   6   2   31.06    3.60
   9   6  -2   29.12    3.42
   9  -6   2   24.92    3.40
   9  -6   2   28.93    3.29
   9   6   2   28.88    3.69
   9  -6  -2   29.08    3.31
  -9   6  -2   28.95    3.56
   9  -6  -2   25.78    3.29
   9   7  -2   60.99    5.28
  -9   7   2   59.92    5.21
   9  -7   2   56.96    4.81
   9  -7   2   56.26    5.11
  -9  -7  -2   61.12    5.50
   9   7   2   62.60    5.41
   9  -7  -2   71.28    5.43
  -9   7  -2   60.12    5.21
   9  -7  -2   69.19    5.10
  -9   0   3    1.25    1.19
   9   0   3    0.56    1.05
   9   0  -3    1.17    1.16
   9   0  -3    1.47    0.92
   9   0  -3   -0.19    0.77
  -9   0  -3   -1.93    1.18
   9   0   3    0.62    1.15
  -9   0   3   -0.11    1.20
  -9   0  -3   -1.32    1.03
   9   0  -3   -0.75    0.72
  -9   1   3    1.65    1.20
  -9  -1  -3   -1.00    1.12
   9  -1   3    0.40    1.11
   9   1  -3    1.51    0.96
   9  -1   3    0.90    1.33
   9   1  -3    0.67    1.06
  -9  -1  -3   -2.12    1.41
   9   1  -3    1.79    0.82
  -9   1   3   -1.42    1.28
   9  -1  -3   -0.56    1.02
   9   1   3    1.17    1.25
  -9  -1   3    1.81    1.45
  -9   1  -3   -1.39    0.94
  -9   1  -3    0.14    0.86
  -9  -1   3    1.26    1.06
   9  -1  -3   -0.52    0.88
  -9   1  -3    2.26    1.34
   9   1   3    1.64    1.13
   9  -1  -3   -0.46    0.80
   9   2  -3   -1.48    0.93
  -9  -2  -3   -2.61    1.54
  -9   2   3   -0.97    1.41
   9  -2   3   -0.89    1.25
   9  -2   3   -3.11    1.51
  -9   2   3    1.28    1.38
  -9  -2  -3   -1.86    1.16
   9   2  -3    3.45    1.41
   9  -2  -3   -2.90    1.63
  -9  -2   3   -0.92    1.37
  -9   2  -3   -0.48    1.14
   9  -2  -3    2.12    1.07
  -9   2  -3   -2.64    1.30
  -9   2  -3    0.61    0.94
   9  -2  -3    0.47    1.40
  -9  -2   3   -0.61    1.33
   9   2   3    0.83    1.01
  -9  -3  -3    1.68    1.60
   9   3  -3   -2.92    1.26
  -9   3   3    0.71    1.54
   9   3  -3   -1.34    1.46
   9  -3   3    0.27    1.44
   9  -3   3    1.63    1.24
  -9   3   3    0.83    1.38
   9  -3  -3    1.51    1.46
  -9  -3   3   -0.30    1.39
  -9   3  -3    0.17    1.15
   9  -3  -3   -1.95    1.27
  -9  -3   3   -1.93    1.50
  -9   3  -3    3.34    1.81
   9   3   3   -0.19    1.05
   9   3   3    3.80    1.77
   9   4  -3    1.35    1.12
  -9   4   3   -1.89    1.53
  -9  -4  -3    0.56    1.43
   9  -4   3    0.66    1.41
   9  -4   3   -1.10    1.93
   9   4  -3    0.13    1.34
  -9  -4   3   -1.42    1.38
  -9   4  -3    0.13    1.31
   9  -4  -3    0.55    1.30
  -9   4  -3    2.90    1.41
   9  -4  -3    0.84    1.20
   9   4   3   -0.54    1.50
   9   5  -3   -0.46    1.60
   9  -5   3   -0.07    1.42
  -9   5   3   -2.20    1.62
  -9   5   3    1.36    1.89
   9   5  -3   -1.53    1.46
   9  -5   3    0.53    1.30
  -9  -5  -3   -1.73    1.85
   9   5   3   -1.59    1.72
   9  -5  -3    0.30    1.32
   9  -5  -3    1.64    1.38
  -9   5  -3   -0.36    1.27
  -9   5  -3   -1.42    1.56
   9   6  -3    2.73    1.90
   9   6  -3   -0.76    1.45
  -9   6   3   -0.53    1.66
  -9  -6  -3   -0.22    1.54
   9  -6   3   -3.57    1.97
  -9   6   3   -3.13    2.43
   9  -6   3   -2.43    1.64
   9   6   3   -1.56    1.74
   9  -6  -3    1.81    1.58
   9  -6  -3    1.29    1.68
  -9   6  -3   -2.14    1.63
  -9   0   4   62.80    4.50
   9   0  -4   60.15    3.70
   9   0   4   64.81    4.50
   9   0  -4   64.69    3.42
   9   0   4   59.34    4.05
   9   0  -4   61.11    3.91
   9   0  -4   61.23    3.20
  -9   0  -4   57.69    3.98
  -9   0  -4   56.43    4.13
   9   1  -4  103.50    5.09
  -9  -1  -4  101.61    5.39
   9  -1   4  107.47    5.61
   9  -1   4  105.33    5.94
  -9  -1  -4  113.90    5.95
   9   1  -4  101.87    5.16
  -9   1   4  106.32    6.01
   9   1   4  108.65    5.96
  -9  -1   4  103.17    6.02
  -9   1  -4  102.23    5.82
   9  -1  -4  113.39    5.51
   9  -1  -4  104.39    4.76
   9  -1  -4  105.15    4.59
  -9   1  -4  108.85    5.59
   9   1   4  104.54    5.27
   9  -1  -4  108.04    5.08
   9   2  -4   56.70    3.82
  -9   2   4   62.13    4.70
   9  -2   4   56.13    4.19
  -9  -2  -4   65.64    4.54
   9  -2   4   62.83    4.59
  -9  -2  -4   48.99    3.80
   9   2  -4   58.45    3.88
   9  -2  -4   69.14    4.02
   9  -2  -4   64.30    4.20
  -9  -2   4   64.13    4.69
   9  -2  -4   66.39    3.91
   9   2   4   54.76    4.38
   9  -2  -4   58.71    3.49
  -9   2  -4   66.29    4.66
  -9   2  -4   56.63    4.08
   9   2   4   60.97    3.99
  -9  -3  -4  100.77    5.38
   9   3  -4  102.04    5.43
   9  -3   4  100.40    5.70
  -9   3   4   95.60    6.03
   9  -3   4   94.81    6.04
   9   3  -4  104.40    5.50
  -9  -3  -4   94.12    5.89
  -9  -3   4   98.59    6.08
  -9   3  -4   97.94    5.68
   9  -3  -4  100.74    4.86
  -9   3  -4  108.02    6.41
   9  -3  -4  107.97    5.53
   9   3   4  100.76    5.03
   9   3   4  101.97    6.29
   9  -3  -4  106.36    5.28
  -9  -4  -4   49.77    4.63
  -9   4   4   51.79    4.81
   9  -4   4   57.08    4.69
   9   4  -4   57.08    4.17
  -9  -4  -4   57.66    4.35
   9   4  -4   52.78    4.03
   9  -4   4   53.71    4.33
  -9   4  -4   55.28    4.55
  -9   4  -4   51.56    4.11
   9  -4  -4   57.32    4.02
  -9  -4   4   54.16    4.62
   9   4   4   52.40    4.68
   9  -4  -4   55.29    3.70
   9  -4  -4   56.01    4.08
   9   4   4   53.07    3.59
  -9   5   4   70.79    5.80
   9  -5   4   62.85    4.83
  -9  -5  -4   64.59    5.29
   9   5  -4   63.42    4.70
   9   5  -4   71.40    4.98
  -9   5  -4   67.40    4.71
   9  -5  -4   71.67    4.80
   9  -5  -4   69.91    4.44
   9   5   4   62.68    5.30
  -9   5  -4   63.53    4.96
   9   6  -4   38.94    4.07
   9  -6   4   37.04    3.89
  -9   6   4   37.56    4.73
   9   6  -4   30.82    3.48
  -9  -6  -4   37.03    4.38
   9   6   4   30.41    4.13
  -9   6  -4   35.16    3.85
   9  -6  -4   38.98    3.59
   9  -6  -4   34.54    3.72
  -9   0  -5   -1.43    1.13
   9   0  -5   -0.12    1.02
  -9   0  -5    0.38    1.19
   9   0   5   -0.43    1.27
   9   0   5    0.99    1.32
  -9   0   5   -2.40    1.60
   9   0  -5   -1.25    1.10
   9   1  -5    0.32    0.93
  -9  -1  -5    3.46    1.44
  -9  -1  -5   -0.81    1.21
   9  -1   5    1.87    1.43
   9   1  -5   -2.13    1.09
   9  -1  -5    3.17    1.16
  -9  -1   5   -0.46    1.50
  -9   1  -5    2.45    1.48
   9  -1  -5    0.49    1.06
   9   1   5    1.20    1.37
  -9   1  -5    1.50    1.33
   9   1   5    0.31    1.23
   9  -1  -5   -1.75    1.16
  -9  -2  -5    1.97    1.49
   9   2  -5    1.81    1.24
   9  -2   5   -2.18    1.61
  -9  -2  -5    2.45    1.48
   9   2  -5    1.88    1.16
  -9   2   5   -1.01    1.61
  -9   2  -5   -0.16    1.41
   9  -2  -5   -0.58    1.13
   9   2   5    1.83    1.64
  -9   2  -5    1.24    1.47
  -9  -2   5    1.29    1.54
   9   2   5   -0.46    1.24
   9  -2  -5   -0.59    1.53
   9  -2  -5    0.54    1.08
  -9  -3  -5    1.51    1.68
   9   3  -5   -1.69    1.34
  -9  -3  -5    0.35    1.35
   9  -3   5    2.43    1.83
   9   3  -5    0.13    1.19
  -9   3   5    0.03    1.45
   9  -3  -5    1.42    1.11
  -9   3  -5    2.89    1.66
   9   3   5    2.86    2.00
   9  -3  -5    0.24    1.14
   9   3   5    1.41    1.32
  -9   3  -5   -0.15    1.38
  -9  -3   5   -1.92    1.69
  -9  -4  -5    0.94    1.86
   9   4  -5    0.13    1.37
   9  -4   5    0.58    1.51
  -9  -4  -5    0.33    1.51
   9   4  -5   -0.34    1.25
  -9   4   5   -2.60    1.96
   9   4   5    1.16    1.41
  -9  -4   5    1.47    1.90
   9   4   5   -0.61    2.73
   9  -4  -5    0.28    1.43
  -9   4  -5   -0.60    1.51
  -9   4  -5    1.44    1.70
   9  -4  -5    1.38    1.36
  -9  -5  -5    5.21    1.85
   9   5  -5   -1.95    1.48
   9   5  -5    0.56    2.12
   9  -5   5    0.06    1.73
  -9  -5  -5   -0.21    1.67
  -9   5   5    3.04    2.29
  -9   5  -5    2.68    1.78
   9  -5  -5   -2.60    1.64
  -9   5  -5    0.36    2.78
  -9   0  -6   43.52    3.67
   9   0   6   48.70    3.99
   9   0  -6   48.25    3.71
   9   0  -6   53.35    3.29
  -9   0  -6   43.80    3.75
  -9   0   6   43.45    4.18
  -9   1   6   85.54    5.85
   9   1  -6   91.52    4.42
   9  -1   6   92.57    5.65
  -9  -1  -6   92.39    5.44
  -9  -1  -6   97.45    5.51
   9   1  -6   92.69    5.28
  -9  -1   6   92.96    6.15
   9  -1  -6   87.14    4.56
  -9   1  -6   98.65    5.61
   9  -1  -6   89.22    5.25
  -9   1  -6   97.65    5.51
   9  -1  -6   93.57    4.47
   9   1   6   95.68    5.49
   9  -2   6   41.10    3.97
   9   2  -6   34.26    2.60
  -9   2   6   44.80    4.36
  -9  -2  -6   41.27    3.85
   9   2  -6   41.98    3.54
  -9  -2  -6   39.09    3.55
   9  -2  -6   42.31    3.61
  -9   2  -6   45.45    3.84
  -9   2  -6   41.26    3.89
   9  -2  -6   47.33    3.42
   9  -2  -6   41.72    3.04
   9   2   6   34.96    3.42
  -9  -2   6   44.72    4.39
   9  -3   6   62.21    4.89
   9   3  -6   70.10    3.99
  -9   3   6   68.65    5.48
   9   3  -6   71.01    4.88
  -9  -3  -6   74.03    5.29
  -9  -3  -6   74.82    4.95
   9  -3  -6   67.37    4.35
  -9  -3   6   73.28    5.61
  -9   3  -6   67.54    4.73
   9   3   6   67.45    4.65
   9  -3  -6   65.72    4.00
  -9   3  -6   70.90    5.08
   9  -4   6   25.90    3.39
   9   4  -6   25.67    2.57
   9   4  -6   25.65    3.09
  -9  -4  -6   30.98    3.42
  -9   4   6   26.03    3.68
  -9  -4  -6   28.33    3.51
  -9  -4   6   28.90    3.93
  -9   4  -6   32.15    3.33
  -9   4  -6   25.56    3.30
   9   4   6   27.57    3.11
   9  -4  -6   27.37    2.97
   9  -4  -6   27.50    2.82
  -9   0  -7    0.50    1.27
   9   0   7   -0.10    1.53
  -9   0   7    0.91    1.74
   9   0  -7    3.15    1.59
  -9   0  -7    0.83    1.47
   9  -1   7    3.25    1.80
  -9  -1  -7   -0.55    1.31
   9   1  -7    3.53    1.59
  -9   1   7    0.84    1.62
  -9  -1  -7   -3.23    1.81
   9   1   7   -1.23    1.57
   9  -1  -7    0.53    2.06
  -9   1  -7   -1.26    1.41
  -9   1  -7    1.49    1.78
   9  -1  -7    0.20    1.19
  -9  -1   7   -0.36    1.85
  -9  -2  -7    4.23    1.75
  -9   2   7    3.25    2.10
   9   2  -7    0.87    1.44
  -9  -2  -7    1.16    1.54
   9  -2   7   -1.19    1.69
  -9   2  -7   -2.09    2.02
  -9  -2   7    1.55    1.80
   9   2   7    0.11    1.72
   9  -2  -7    1.22    2.09
  -9   2  -7   -1.01    2.00
   9  -2  -7    2.37    1.30
   9  -3   7    0.35    1.76
   9   3  -7    1.68    1.55
  -9  -3  -7    2.63    2.18
  -9  -3  -7   -0.41    2.61
  -9   3  -7   -2.30    2.45
  -9   3  -7    2.48    1.86
   9  -3  -7    0.75    1.29
   9  -3  -7    4.44    1.84
  -9  -3   7    4.57    2.20
   9   3   7    0.88    2.30
  -9   0   8   28.11    3.80
   9   0  -8   22.35    2.98
   9   0   8   26.10    3.37
  -9   0  -8   22.79    2.75
  -9   0  -8   27.66    3.32
  -9  -1  -8   38.04    3.79
  -9  -1  -8   42.99    3.66
   9   1  -8   42.34    4.11
  -9   1   8   40.57    4.33
   9  -1   8   37.40    4.00
  -9   1  -8   36.14    3.82
   9  -1  -8   36.65    3.70
   9   1   8   47.05    4.33
  -9  -1   8   42.10    4.52
  -9   1  -8   43.28    3.53
 -10   0   0   58.28    3.50
 -10   0   0   62.43    3.87
 -10   0   0   60.98    4.15
  10   0   0   54.27    4.17
  10   0   0   59.12    3.54
 -10   1   0  127.78    6.51
 -10  -1   0  122.23    5.59
 -10   1   0  125.64    5.80
  10   1   0  127.05    5.19
 -10   1   0  127.53    5.30
 -10  -1   0  126.56    6.43
  10  -1   0  124.17    6.44
  10  -1   0  122.67    5.52
  10   1   0  124.90    6.43
 -10   2   0   45.90    2.95
  10  -2   0   42.40    3.77
 -10   2   0   49.67    3.64
 -10  -2   0   48.09    3.40
 -10  -2   0   45.93    3.92
  10   2   0   43.85    3.98
  10  -2   0   50.17    3.54
 -10   2   0   47.96    4.02
  10   3   0  148.36    7.48
 -10  -3   0  136.96    7.15
  10  -3   0  125.27    6.07
 -10  -3   0  131.95    6.09
 -10   3   0  134.43    6.44
 -10   3   0  132.58    7.29
  10  -3   0  122.22    6.92
  10  -4   0   39.68    3.50
 -10  -4   0   31.69    3.67
 -10  -4   0   36.50    3.25
 -10   4   0   36.10    4.01
  10  -4   0   34.28    3.98
 -10   4   0   35.46    3.51
  10   4   0   32.23    3.79
 -10  -5   0   95.00    6.45
 -10   5   0   98.01    6.79
  10  -5   0   94.25    5.67
 -10   5   0   87.50    5.80
  10  -5   0   92.82    6.51
  10   5   0   92.95    6.38
  10   6   0   26.74    3.78
  10  -6   0   28.97    3.90
  10  -6   0   30.03    3.43
 -10   6   0   24.29    3.73
 -10  -6   0   19.78    3.46
 -10   0  -1   -1.38    1.18
 -10   0  -1   -0.15    0.87
 -10   0   1    0.98    1.12
  10   0  -1    1.13    0.87
  10   0   1   -1.90    1.33
 -10   0  -1    0.49    0.99
  10   0   1   -0.59    1.17
 -10   0   1    1.22    1.32
  10   0  -1   -0.40    1.05
 -10   0   1   -0.36    0.94
 -10  -1  -1    0.75    0.97
  10  -1   1    1.00    1.12
 -10  -1  -1   -0.44    1.18
 -10   1   1    1.74    1.24
  10  -1   1   -0.22    1.24
 -10   1   1   -1.03    0.81
 -10   1   1   -0.18    1.02
  10   1  -1    0.57    1.20
  10   1  -1   -0.06    0.87
 -10  -1  -1   -2.50    1.21
  10   1   1   -0.14    0.96
  10  -1  -1    0.05    1.01
  10   1   1   -1.03    1.25
  10  -1  -1   -0.76    1.01
  10  -1  -1   -0.57    0.74
 -10   1  -1    0.07    1.05
 -10   1  -1   -1.18    1.41
 -10  -1   1    0.56    1.18
 -10  -1   1    0.32    1.11
 -10   1  -1   -0.12    0.88
 -10   2   1    0.23    1.33
 -10  -2  -1   -0.92    1.17
 -10   2   1    1.55    1.43
 -10  -2  -1   -0.34    1.04
  10  -2   1    1.26    1.31
  10   2  -1    1.90    1.34
  10  -2   1    1.73    1.28
  10   2   1   -0.03    0.97
 -10   2  -1    1.45    0.99
 -10  -2   1    0.76    1.20
  10  -2  -1    0.95    1.18
  10   2   1    1.79    1.44
 -10   2  -1    1.26    1.24
 -10  -2   1   -1.13    1.18
 -10   2  -1    5.39    1.68
  10   3  -1    1.07    1.44
  10  -3   1    1.88    1.60
 -10   3   1    1.40    1.41
 -10   3   1   -0.69    1.44
 -10  -3  -1    2.04    1.51
  10   3   1    2.64    1.61
  10  -3  -1    1.99    1.48
  10  -3  -1    0.60    1.15
 -10  -3   1    2.23    1.43
 -10   3  -1   -0.38    1.25
 -10  -3   1   -0.30    1.38
 -10   3  -1    1.22    1.50
 -10  -4  -1   -0.09    1.56
  10  -4   1    0.77    1.28
  10   4  -1   -0.03    1.45
 -10   4   1    0.40    1.51
 -10   4   1   -2.07    1.67
  10  -4   1    0.57    1.63
  10  -4  -1    1.73    1.58
  10   4   1    0.44    1.67
 -10   4  -1    0.74    1.53
 -10  -4   1   -1.54    1.62
 -10  -4   1    1.45    1.56
  10  -4  -1    1.67    1.43
 -10   4  -1   -0.45    1.32
  10  -5   1   -0.98    1.90
 -10  -5  -1   -2.81    1.92
 -10   5   1   -1.61    1.91
  10  -5   1    2.70    1.64
 -10   5   1   -0.99    1.76
  10   5  -1   -1.10    1.66
 -10  -5   1   -3.12    1.87
 -10  -5   1   -0.31    1.60
  10   5   1    0.65    1.70
 -10   5  -1    1.36    1.70
 -10   5  -1    0.69    1.88
  10  -5  -1    2.21    1.90
  10  -5  -1   -2.07    1.53
 -10  -6  -1    1.21    2.31
  10   6  -1   -1.85    3.16
 -10   6   1    1.56    1.92
  10  -6   1   -0.90    2.25
  10  -6   1   -1.99    1.73
 -10   6   1    1.84    2.22
 -10  -6   1   -4.71    2.42
 -10   6  -1    1.85    2.11
  10   6   1    1.81    1.98
  10  -6  -1   -1.48    1.63
  10  -6  -1    0.36    1.75
  10   0  -2   37.99    2.69
  10   0   2   34.85    3.50
 -10   0  -2   36.13    3.03
 -10   0  -2   37.50    2.70
  10   0  -2   33.61    2.64
 -10   0   2   38.91    3.44
  10   0  -2   34.16    3.30
 -10   0   2   34.93    3.35
 -10   0  -2   33.58    3.34
  10   0   2   35.63    3.08
 -10   1   2  163.03    7.38
  10  -1   2  165.33    7.69
  10   1  -2  161.87    7.28
 -10   1   2  154.13    7.11
 -10  -1  -2  160.24    7.41
 -10  -1  -2  152.48    6.58
  10   1  -2  158.10    6.30
  10  -1   2  164.06    6.80
 -10  -1   2  149.13    6.90
  10   1   2  166.09    7.71
 -10  -1   2  163.88    7.25
  10  -1  -2  156.43    7.28
  10   1   2  151.57    6.35
 -10   1  -2  150.02    6.45
  10  -1  -2  157.99    6.20
  10  -1  -2  156.77    5.78
 -10   1  -2  168.40    7.75
 -10   1  -2  156.71    6.15
  10   2  -2   35.23    3.46
  10  -2   2   36.75    3.24
 -10  -2  -2   44.61    3.93
 -10   2   2   36.41    3.56
 -10   2   2   38.66    3.57
  10  -2   2   34.18    3.52
 -10  -2  -2   39.48    3.26
 -10   2  -2   37.18    3.07
  10  -2  -2   39.33    3.12
 -10  -2   2   39.67    3.58
  10  -2  -2   37.13    3.57
 -10  -2   2   32.67    3.35
 -10   2  -2   41.84    3.77
  10   2   2   33.65    3.62
 -10   2  -2   40.77    3.03
  10   2   2   40.99    2.97
  10  -3   2  112.88    6.70
  10   3  -2  102.96    6.12
 -10   3   2  103.55    6.06
 -10   3   2  113.71    6.50
  10  -3   2  105.08    5.72
 -10  -3  -2  110.48    6.46
  10   3   2  106.25    6.54
 -10   3  -2  102.03    5.25
  10  -3  -2  106.64    5.44
 -10  -3   2  102.79    5.85
 -10   3  -2  109.11    6.60
  10  -3  -2  116.36    6.49
 -10   3  -2  111.27    5.39
 -10  -3   2  111.27    6.27
  10  -4   2   31.26    3.93
  10  -4   2   34.87    3.33
 -10   4   2   38.04    4.09
 -10   4   2   29.54    3.61
  10   4  -2   32.94    3.72
 -10  -4  -2   23.53    3.38
 -10  -4   2   32.82    3.47
  10  -4  -2   32.49    3.10
 -10   4  -2   28.26    3.70
 -10  -4   2   34.64    3.68
  10   4   2   36.59    4.05
 -10   4  -2   29.73    3.11
  10  -4  -2   36.08    3.88
 -10   5   2   82.57    5.99
  10   5  -2   82.76    6.00
 -10  -5  -2   76.67    5.98
  10  -5   2   72.90    5.96
 -10   5   2   83.55    6.05
  10  -5   2   79.44    5.22
  10  -5  -2   85.49    5.34
  10  -5  -2   88.67    6.01
  10   5   2   81.05    6.23
 -10   5  -2   82.86    6.16
 -10  -5   2   86.62    5.73
  10  -6   2   16.31    4.02
 -10   6   2   19.06    3.44
 -10  -6  -2   17.03    3.45
  10   6  -2   17.97    3.19
  10  -6   2   17.32    2.81
 -10   6   2   15.45    2.89
  10  -6  -2   15.74    2.86
  10   6   2   11.58    3.01
  10  -6  -2   14.94    2.58
 -10   6  -2   11.34    2.98
  10   0  -3    0.24    0.81
 -10   0  -3   -0.79    1.35
 -10   0   3   -0.70    1.43
  10   0  -3   -0.74    1.12
  10   0  -3    1.01    0.96
  10   0   3   -0.66    1.34
 -10   0   3    3.57    1.47
 -10   0  -3    0.16    0.99
  10   0   3    0.17    1.39
  10   1  -3    0.27    0.88
 -10   1   3    2.80    1.54
 -10  -1  -3    1.43    1.19
 -10  -1  -3    0.52    1.21
 -10   1   3    0.21    1.21
  10  -1   3   -1.69    1.48
  10   1  -3    0.57    1.29
  10  -1   3    1.39    1.39
 -10  -1   3   -1.08    1.39
 -10  -1   3   -0.43    1.24
  10  -1  -3    0.34    1.13
  10  -1  -3   -0.60    1.08
 -10   1  -3    0.77    1.44
 -10   1  -3    0.25    1.06
  10   1   3   -0.33    1.23
  10   1   3    1.99    1.44
 -10   2   3    1.30    1.56
  10   2  -3    0.29    1.20
  10  -2   3   -0.17    1.43
  10   2  -3   -1.10    0.97
 -10   2   3    0.74    1.39
 -10  -2  -3    0.67    1.37
  10  -2   3   -1.78    1.55
 -10  -2  -3   -0.71    1.05
 -10   2  -3   -1.01    1.15
  10  -2  -3    3.80    1.66
 -10  -2   3    0.19    1.32
  10  -2  -3    0.22    1.06
  10   2   3   -2.05    1.62
 -10   2  -3    1.24    1.42
  10   2   3    2.14    1.41
  10   3  -3    0.06    1.11
  10   3  -3    1.70    1.42
 -10   3   3    2.25    1.61
 -10  -3  -3    1.28    1.40
 -10   3   3    2.26    1.78
 -10  -3  -3   -1.17    1.55
  10  -3   3    0.25    1.30
  10  -3   3   -0.09    1.41
 -10   3  -3    0.24    1.46
  10  -3  -3    0.06    1.45
 -10   3  -3   -1.38    1.42
 -10  -3   3   -1.72    1.54
  10   3   3    2.34    1.46
  10   3   3    0.08    1.47
  10   4  -3   -0.70    1.59
 -10  -4  -3   -0.91    1.79
  10  -4   3   -0.55    1.75
 -10   4   3    0.19    1.58
 -10   4   3    0.07    2.34
  10  -4   3   -0.54    1.50
  10   4  -3   -0.12    1.08
  10  -4  -3    0.33    1.55
  10   4   3   -1.54    1.91
 -10   4  -3    1.03    1.76
 -10  -4   3   -0.67    2.08
  10  -4  -3   -1.17    1.24
 -10   4  -3   -0.41    1.30
  10  -5   3    1.33    2.25
  10   5  -3   -0.21    1.30
 -10  -5  -3    1.83    1.86
 -10   5   3   -2.65    2.17
  10   5  -3    0.66    1.81
 -10   5   3   -1.46    2.18
  10  -5   3   -0.37    1.45
  10  -5  -3    0.45    1.40
  10   5   3    3.68    2.04
  10  -5  -3   -1.20    1.57
 -10  -5   3    3.98    2.59
 -10   5  -3   -0.99    1.87
 -10   0  -4   47.08    3.82
  10   0  -4   40.35    3.30
 -10   0   4   45.80    4.09
  10   0   4   43.05    3.54
 -10   0  -4   40.11    3.41
  10   0  -4   39.30    3.13
  10   0   4   40.97    3.82
  10  -1   4   99.47    5.52
 -10  -1  -4   95.18    5.70
  10   1  -4   89.40    4.89
 -10  -1  -4   87.50    5.11
  10  -1   4   95.33    5.73
  10   1  -4  102.56    5.34
 -10   1   4   87.71    5.62
  10   1   4   87.45    5.63
  10  -1  -4   94.87    4.66
 -10   1  -4   95.36    5.68
 -10   1  -4   87.59    5.10
  10  -1  -4   98.70    5.32
 -10  -1   4   97.84    5.84
  10  -1  -4   95.57    4.72
  10   1   4   94.54    5.19
  10  -1  -4   89.98    4.30
 -10   2   4   41.69    3.93
 -10  -2  -4   39.04    3.39
  10  -2   4   33.41    3.54
  10   2  -4   38.35    3.32
  10   2  -4   31.81    3.00
 -10  -2  -4   34.38    3.57
  10  -2   4   35.28    3.50
 -10   2  -4   32.57    3.24
  10   2   4   39.30    3.33
  10   2   4   35.28    3.68
 -10  -2   4   31.12    3.54
  10  -2  -4   34.83    3.29
  10  -2  -4   34.40    2.91
  10  -2  -4   33.26    2.76
 -10   2  -4   37.65    3.72
 -10  -3  -4  101.62    6.25
  10  -3   4   92.31    5.56
  10   3  -4   95.79    5.41
 -10   3   4   99.10    6.25
 -10  -3  -4   91.68    5.50
  10   3  -4   96.02    5.36
  10  -3   4   95.21    6.14
  10   3   4   97.58    6.32
  10  -3  -4  103.48    5.90
 -10   3  -4   87.07    5.37
  10   3   4   90.07    5.03
 -10  -3   4   98.04    6.16
  10  -3  -4   92.65    4.77
 -10   3  -4   84.02    5.85
  10  -3  -4  100.10    5.29
  10  -4   4   26.14    3.19
 -10  -4  -4   30.89    3.72
 -10   4   4   29.56    3.67
 -10  -4  -4   27.86    3.25
  10   4  -4   31.43    3.33
  10   4  -4   22.53    2.85
  10  -4  -4   25.97    2.76
 -10  -4   4   21.16    3.27
  10   4   4   21.86    3.38
  10  -4  -4   33.98    3.50
 -10   4  -4   23.59    3.43
 -10   4  -4   22.77    2.97
  10  -4  -4   25.16    2.89
  10   5  -4   73.28    5.15
 -10  -5  -4   66.45    4.99
 -10  -5  -4   60.49    5.46
 -10   5   4   69.85    5.79
  10   5  -4   63.16    4.75
  10  -5   4   63.46    4.97
 -10  -5   4   68.02    5.56
  10  -5  -4   72.10    5.21
 -10   5  -4   72.74    5.77
  10   5   4   62.56    5.56
  10  -5  -4   67.47    4.54
  10   0   5    2.78    1.75
  10   0  -5   -0.72    1.12
 -10   0  -5    2.07    1.56
  10   0  -5   -1.98    1.26
 -10   0  -5   -0.72    1.19
 -10   0   5   -1.65    1.73
 -10   1   5    2.03    1.79
  10   1  -5    0.07    1.15
 -10  -1  -5   -0.71    1.24
  10  -1   5    1.46    1.70
 -10  -1  -5    1.28    1.49
  10   1  -5    2.62    1.28
  10  -1  -5    0.71    1.44
 -10  -1   5    3.49    1.92
  10   1   5    1.80    1.44
  10  -1  -5    0.97    1.23
 -10   1  -5   -0.75    1.39
 -10   1  -5    0.63    1.59
  10   2  -5   -0.30    1.54
  10  -2   5   -0.09    1.42
  10   2  -5    0.83    1.20
 -10   2   5    2.26    1.79
 -10  -2  -5   -1.24    2.07
 -10  -2  -5   -1.80    1.66
  10  -2  -5    0.14    1.17
 -10   2  -5   -1.08    1.69
 -10   2  -5    3.84    1.77
  10  -2  -5   -1.44    1.37
 -10  -2   5   -0.36    1.46
  10   2   5    0.08    1.43
 -10   3   5    1.84    1.75
 -10  -3  -5    0.50    1.61
  10   3  -5    1.30    3.04
  10   3  -5    1.57    1.41
 -10  -3  -5   -0.54    2.12
  10  -3   5   -0.39    1.58
 -10   3  -5   -0.39    1.38
 -10  -3   5    3.64    2.01
  10  -3  -5    1.19    2.27
  10  -3  -5    0.72    1.87
  10   3   5    1.27    1.57
 -10   3  -5    0.52    1.56
 -10  -4  -5   -1.37    2.36
  10  -4   5   -0.46    1.60
  10   4  -5   -3.32    1.64
 -10  -4  -5    2.82    2.09
 -10   4   5   -3.25    2.12
  10   4  -5   -1.92    1.62
 -10   4  -5    0.69    1.90
  10  -4  -5   -1.39    1.50
 -10  -4   5    0.36    2.02
  10  -4  -5    1.42    1.48
 -10   4  -5    3.56    2.16
 -10   0  -6   21.11    2.86
  10   0  -6   22.57    2.43
  10   0  -6   23.02    2.65
 -10   0  -6   19.24    2.72
 -10   0   6   25.27    3.41
  10   0   6   20.63    2.95
  10  -1   6   80.89    5.51
  10   1  -6   79.13    4.95
 -10  -1  -6   87.30    5.39
 -10  -1  -6   84.89    5.32
 -10   1   6   82.89    5.86
  10   1  -6   83.79    4.38
  10  -1  -6   76.75    4.91
  10  -1  -6   89.72    4.74
 -10  -1   6   82.29    5.80
  10   1   6   83.51    5.41
 -10   1  -6   87.28    5.34
 -10   1  -6   83.19    5.29
  10   2  -6   20.58    2.37
 -10  -2  -6   20.08    2.86
  10  -2   6   18.60    2.91
 -10  -2  -6   15.96    2.60
  10   2  -6   18.99    2.51
 -10   2   6   22.37    3.42
 -10  -2   6   19.12    3.18
 -10   2  -6   20.54    3.05
  10   2   6   18.53    2.85
  10  -2  -6   24.82    2.71
 -10   2  -6   20.48    2.98
  10  -2  -6   23.00    2.58
 -10  -3  -6   61.68    4.95
 -10  -3  -6   57.79    4.42
  10   3  -6   58.04    4.44
  10  -3   6   69.18    5.17
  10   3  -6   55.92    3.86
 -10   3   6   62.07    5.26
  10   3   6   60.17    4.58
 -10  -3   6   66.75    5.51
 -10   3  -6   61.29    4.80
  10  -3  -6   57.99    4.00
 -10   3  -6   57.60    4.69
  10  -3  -6   56.93    4.06
  10   0   7    0.12    2.71
 -10   0   7   -1.98    1.92
  10   0  -7    3.03    1.62
 -10   0  -7    0.03    1.28
 -10   0  -7   -0.14    1.60
  10   1  -7    1.63    1.57
  10  -1   7    1.97    1.90
 -10  -1  -7    0.89    1.60
 -10  -1  -7   -1.46    1.77
 -10   1   7    1.92    1.85
 -10   1  -7    0.13    1.87
 -10   1  -7    1.87    2.84
  10   1   7    1.05    1.94
 -10  -1   7    0.62    2.99
  11   0   0  178.07    8.07
 -11   0   0  179.32    6.84
 -11   0   0  177.21    7.22
  11   0   0  179.35    6.80
 -11   0   0  164.40    7.82
 -11  -1   0    0.77    1.30
  11  -1   0   -0.10    1.19
  11  -1   0    1.60    1.29
 -11  -1   0    0.83    1.09
 -11   1   0    1.82    1.37
 -11   1   0    0.79    1.31
  11   1   0    0.87    1.35
 -11   1   0    0.90    0.96
 -11  -2   0  144.67    7.38
 -11   2   0  148.13    6.88
  11   2   0  156.17    7.70
 -11  -2   0  149.19    6.57
  11  -2   0  148.18    6.58
  11  -2   0  144.58    7.41
 -11   2   0  143.44    7.41
  11  -3   0    4.05    1.81
 -11  -3   0    1.45    1.49
 -11   3   0    3.48    1.77
 -11   3   0    1.44    1.48
  11   3   0    1.61    1.55
  11  -3   0    4.19    1.60
  11  -4   0  103.75    5.81
 -11   4   0  105.14    6.10
 -11  -4   0  100.73    6.53
  11  -4   0  108.92    7.00
 -11   4   0   96.85    6.60
  11   4   0   95.41    6.42
  11  -5   0   -2.49    2.26
 -11   5   0    4.12    2.05
  11  -5   0    2.34    2.30
 -11  -5   0    0.36    3.16
  11   5   0   -1.89    1.81
 -11   5   0    1.97    2.25
 -11   0   1    3.36    1.46
 -11   0  -1   -1.40    1.20
  11   0  -1   -1.55    1.26
 -11   0   1    0.09    1.16
  11   0   1    0.99    1.15
  11   0   1   -0.28    1.39
 -11   0  -1    3.27    1.69
 -11   0  -1   -0.76    1.12
  11   0  -1   -1.65    0.97
  11   0  -1    1.86    1.40
 -11   0   1    0.26    0.98
 -11   1   1    0.86    1.36
  11  -1   1   -0.04    1.26
 -11  -1  -1   -0.15    1.10
 -11   1   1    1.65    1.45
  11  -1   1    1.78    1.30
 -11  -1  -1    0.97    1.04
  11   1  -1    2.67    1.58
 -11  -1  -1    0.07    1.35
 -11   1  -1    2.76    1.41
  11  -1  -1   -0.09    1.23
 -11  -1   1    0.33    1.31
  11   1   1   -0.36    1.38
 -11   1  -1   -0.08    1.28
 -11  -1   1    3.54    1.49
  11   1   1    2.35    1.36
  11  -1  -1   -0.02    1.05
 -11  -2  -1    0.28    1.46
 -11   2   1    0.08    1.29
  11   2  -1    0.31    1.43
  11  -2   1    2.01    1.33
  11  -2   1    0.38    1.28
 -11   2   1    1.96    1.51
 -11  -2   1    2.02    1.55
 -11  -2   1   -1.54    1.36
 -11   2  -1   -2.33    1.25
 -11   2  -1    2.53    1.59
  11  -2  -1    0.90    1.28
  11  -2  -1    2.65    1.34
  11   2   1    2.92    1.68
 -11   2  -1   -0.57    1.28
 -11   3   1    0.90    1.60
 -11  -3  -1   -0.42    1.96
  11  -3   1   -0.86    1.46
 -11   3   1    0.20    1.46
  11  -3   1    0.51    1.62
  11   3  -1   -1.04    1.49
  11  -3  -1   -1.61    1.35
  11  -3  -1    1.90    1.71
 -11   3  -1   -0.45    1.57
 -11  -3   1    1.55    1.71
 -11  -3   1   -0.51    1.32
 -11   3  -1    0.44    1.47
  11   3   1    0.96    1.61
 -11  -4  -1    0.98    1.75
 -11   4   1   -3.58    2.05
  11  -4   1   -0.56    1.29
 -11   4   1    0.85    1.74
  11   4  -1   -0.67    1.50
  11  -4   1    1.03    1.80
 -11  -4   1    1.19    1.78
  11  -4  -1   -3.23    1.96
  11   4   1   -0.98    1.71
 -11   4  -1   -1.98    1.70
 -11  -4   1    1.51    2.14
  11  -4  -1   -0.60    1.41
 -11   4  -1    3.49    1.96
  11  -5   1    1.41    1.57
 -11   5   1    4.81    2.33
  11  -5   1    7.09    2.64
 -11   5   1   -2.53    3.00
 -11  -5  -1   -0.89    2.00
  11  -5  -1    1.00    1.90
  11   5   1   -0.55    2.00
  11  -5  -1    0.79    1.54
 -11  -5   1   -0.41    2.51
 -11   5  -1   -2.36    2.01
 -11   0  -2  107.57    5.52
  11   0  -2  113.72    5.09
  11   0   2  104.28    6.33
 -11   0   2  111.08    6.17
  11   0  -2  118.25    6.29
 -11   0   2  119.43    6.14
  11   0  -2  112.73    5.16
  11   0   2  115.18    5.68
 -11   0  -2  112.10    6.37
 -11   1   2    1.51    1.46
  11   1  -2    3.97    1.29
  11   1  -2    4.96    1.84
 -11   1   2    6.37    1.81
 -11  -1  -2    3.58    1.30
  11  -1   2    2.88    1.40
  11  -1   2    3.16    1.53
 -11  -1  -2    4.06    1.60
 -11   1  -2    1.68    1.39
  11   1   2   -0.19    1.22
 -11   1  -2    1.71    1.16
  11   1   2    2.34    1.42
 -11  -1   2    5.21    1.64
 -11  -1   2    2.33    1.46
  11  -1  -2   -0.75    1.34
  11  -1  -2    2.98    1.30
 -11  -2  -2  118.86    5.98
  11   2  -2  122.71    5.88
  11  -2   2  125.53    6.89
 -11  -2  -2  121.00    6.74
  11  -2   2  137.83    6.55
  11   2  -2  125.99    6.74
 -11   2   2  131.16    6.67
 -11   2   2  115.72    6.59
  11  -2  -2  113.48    6.53
 -11  -2   2  125.74    6.44
 -11   2  -2  115.27    5.68
  11   2   2  114.87    6.80
  11  -2  -2  126.71    5.90
  11   2   2  120.95    5.63
 -11   2  -2  128.99    5.79
 -11  -2   2  124.70    6.68
 -11   2  -2  121.02    6.81
  11  -3   2    1.58    1.88
  11   3  -2   -2.27    1.80
 -11   3   2    6.01    1.99
 -11   3   2    0.76    1.67
 -11  -3  -2   -0.20    1.40
  11  -3   2   -0.77    1.46
 -11   3  -2    1.45    1.61
 -11   3  -2    1.92    1.50
  11  -3  -2   -0.40    1.51
 -11  -3   2    0.46    1.63
  11   3   2    0.93    1.48
  11  -3  -2    0.26    1.22
  11   4  -2  114.99    6.75
 -11   4   2   99.39    6.67
  11  -4   2  114.37    6.27
  11  -4   2  106.36    6.97
 -11   4   2  105.84    6.59
 -11  -4  -2  106.46    6.81
  11  -4  -2  103.49    5.85
  11   4   2  107.50    7.03
 -11  -4   2  104.26    6.35
 -11   4  -2  107.51    6.92
  11  -4  -2  102.78    6.64
 -11  -5  -2    1.13    2.07
  11   5  -2    2.02    2.31
  11  -5   2    0.39    4.29
  11  -5   2    2.33    1.66
 -11   5   2   -0.84    3.73
 -11   5   2    3.42    2.16
  11   5   2    2.02    2.43
 -11  -5   2    4.96    2.88
 -11   5  -2    0.84    2.00
  11  -5  -2    0.78    3.46
  11  -5  -2   -0.22    1.92
  11   0  -3    0.22    0.92
 -11   0  -3   -0.99    1.24
  11   0   3    0.39    1.51
 -11   0   3   -0.56    1.40
 -11   0  -3    1.33    1.52
  11   0   3   -1.00    1.46
  11   0  -3    2.64    1.48
 -11   1   3   -0.56    1.33
  11  -1   3    2.47    1.53
  11  -1   3   -1.09    1.44
 -11   1   3    1.44    2.75
 -11  -1  -3   -1.57    1.48
  11   1  -3   -0.26    1.27
 -11  -1  -3    1.24    1.27
  11   1  -3   -0.54    0.94
  11  -1  -3   -0.15    1.34
  11   1   3    1.40    1.45
 -11  -1   3    2.48    1.58
 -11   1  -3   -1.48    1.55
  11  -1  -3   -0.77    1.26
  11   1   3    0.80    1.90
 -11   2   3   -2.26    1.72
  11  -2   3   -1.62    1.51
 -11  -2  -3    0.83    1.17
  11   2  -3   -0.17    1.06
  11  -2   3    1.81    1.64
 -11  -2  -3   -0.31    1.35
 -11   2  -3   -0.43    1.36
  11  -2  -3    0.76    1.39
  11   2   3    1.95    1.63
  11  -2  -3   -0.48    1.26
  11   2   3    0.66    1.41
 -11  -2   3    1.23    1.60
 -11   2  -3    0.02    1.13
 -11   3   3   -0.67    3.33
  11  -3   3    4.80    2.03
  11  -3   3   -1.86    1.49
 -11  -3  -3    0.23    1.24
  11   3  -3   -0.35    1.34
  11   3  -3   -0.46    1.32
 -11  -3  -3    0.94    1.62
 -11   3   3   -2.31    1.85
 -11  -3   3    1.01    1.78
  11   3   3    0.20    1.48
  11  -3  -3   -0.49    1.65
 -11   3  -3    0.86    1.79
 -11   3  -3    2.16    1.82
  11  -3  -3   -0.40    1.70
 -11  -4  -3    0.94    2.47
  11  -4   3    0.22    1.59
  11   4  -3    2.90    1.90
 -11   4   3   -1.09    1.88
  11   4  -3   -0.96    1.65
 -11  -4  -3   -1.06    1.64
  11  -4   3    2.77    2.13
  11   4   3    0.92    2.00
 -11  -4   3    0.55    1.79
 -11   4  -3    0.46    1.73
  11  -4  -3   -0.17    2.43
  11  -4  -3   -0.40    2.83
  11   0   4  137.37    6.61
 -11   0   4  141.78    7.18
  11   0   4  124.66    6.92
  11   0  -4  142.85    6.53
  11   0  -4  127.98    5.92
 -11   0  -4  130.69    6.95
 -11   0  -4  130.27    6.39
  11   1  -4   -1.09    1.04
  11  -1   4   -0.55    1.46
 -11  -1  -4   -0.58    1.25
  11  -1   4    1.71    1.68
 -11  -1  -4    0.86    1.39
 -11   1   4   -1.25    1.51
  11   1  -4   -0.30    1.57
  11   1   4    1.67    1.66
 -11   1  -4    0.72    1.47
  11   1   4   -1.86    1.52
  11  -1  -4   -0.63    1.19
 -11   1  -4    0.78    1.53
 -11  -1   4   -0.55    1.59
  11  -1  -4    2.26    1.43
  11   2  -4  111.45    5.80
  11  -2   4  122.16    6.45
 -11   2   4  106.84    6.52
  11  -2   4  108.93    6.51
 -11  -2  -4  108.98    6.03
 -11  -2  -4  108.41    6.51
  11   2  -4  107.61    5.95
 -11   2  -4  107.46    5.86
 -11  -2   4  111.30    6.48
  11   2   4  105.86    6.59
  11   2   4  105.82    5.62
  11  -2  -4  106.49    5.46
 -11   2  -4  108.06    6.39
  11  -2  -4  110.48    5.20
  11  -2  -4  111.05    6.01
  11   3  -4    0.97    1.39
 -11   3   4    1.37    1.94
 -11  -3  -4   -1.33    1.53
  11   3  -4   -0.34    1.48
  11  -3   4   -0.16    1.43
 -11  -3  -4    0.25    1.49
 -11  -3   4    5.54    2.15
  11  -3  -4    2.97    1.68
  11  -3  -4    0.59    1.44
 -11   3  -4    0.21    1.52
  11   3   4    1.79    3.07
  11  -3  -4    3.56    1.55
 -11   3  -4    0.51    1.65
 -11  -4  -4   77.51    5.27
 -11   4   4   75.27    5.91
  11   4  -4   75.11    5.21
 -11  -4  -4   81.44    6.05
  11  -4   4   75.21    5.42
  11   4  -4   78.96    5.18
 -11   4  -4   78.02    5.90
 -11  -4   4   80.75    5.94
  11  -4  -4   87.43    5.94
  11  -4  -4   78.87    4.82
  11  -4  -4   83.47    5.24
  11   4   4   68.54    5.80
 -11   0  -5    0.89    1.83
  11   0   5   -3.60    2.01
 -11   0  -5    1.10    1.55
  11   0  -5    1.08    1.29
  11   0  -5   -0.26    1.14
 -11   0   5    2.22    1.75
  11   1  -5    0.89    1.95
 -11   1   5   -2.25    1.84
  11  -1   5   -2.77    1.83
 -11  -1  -5    2.37    1.73
 -11  -1  -5   -0.21    1.88
  11   1  -5    2.87    2.45
  11   1   5    2.40    1.68
 -11  -1   5    1.98    1.65
 -11   1  -5   -0.29    1.31
  11  -1  -5    0.75    1.33
 -11   1  -5   -1.96    1.62
 -11   2   5   -0.76    1.71
  11   2  -5    1.37    1.94
  11  -2   5    0.37    1.71
 -11  -2  -5    0.14    1.60
 -11  -2  -5    0.20    1.28
  11   2  -5   -1.87    1.32
  11  -2  -5    0.60    1.41
 -11  -2   5    1.53    1.83
  11   2   5   -1.19    1.67
 -11   2  -5   -0.60    2.24
 -11   2  -5   -1.68    1.74
  11  -3   5    0.67    1.54
  11   3  -5    1.07    2.55
  11   3  -5   -0.97    1.84
 -11  -3  -5    1.01    2.41
 -11   3   5   -4.95    2.53
 -11  -3  -5    0.15    1.85
  11  -3  -5    0.02    2.47
 -11  -3   5    2.50    2.74
 -11   3  -5    1.55    2.28
  11  -3  -5   -0.24    2.06
 -11   3  -5   -1.73    2.03
  11   0   6   66.97    5.03
 -11   0  -6   61.43    4.79
  11   0  -6   65.65    4.11
  11   0  -6   61.78    4.35
 -11   0   6   65.40    5.35
 -11   0  -6   66.08    4.80
  11   1  -6    2.57    1.59
 -11   1   6    0.52    2.73
  11   1  -6    2.45    2.37
  11  -1  -6    0.31    1.36
 -11  -1   6    0.41    1.79
 -12   0   0   11.24    2.10
 -12   0   0   11.73    1.94
 -12   0   0   13.03    2.44
  12   0   0   13.81    2.09
  12   0   0   12.56    2.40
  12  -1   0   91.15    5.07
 -12  -1   0   86.26    5.51
 -12   1   0   86.06    5.05
  12  -1   0   78.18    5.56
 -12   1   0   84.21    5.62
  12   1   0   89.72    5.80
 -12  -1   0   82.96    4.86
 -12  -1   0   87.56    4.76
  12  -2   0   10.67    2.29
  12   2   0   10.69    2.38
 -12  -2   0   11.59    2.38
 -12   2   0   11.63    2.41
 -12   2   0    8.35    2.10
  12  -2   0   11.43    2.22
 -12   3   0   85.82    5.40
  12  -3   0   77.42    5.76
  12   3   0   90.46    6.19
 -12   3   0   83.79    5.98
 -12  -3   0   87.80    5.93
  12  -3   0   94.07    5.63
 -12  -4   0    7.72    2.41
 -12   4   0    8.27    2.39
  12  -4   0    8.11    3.03
  12  -4   0    6.67    2.29
  12   4   0    7.53    2.41
 -12   4   0    2.41    1.93
 -12   0   1    0.56    1.50
  12   0  -1    0.01    1.23
 -12   0  -1    0.37    1.13
  12   0   1    2.89    1.55
  12   0   1   -2.00    1.60
  12  -1   1   -3.53    1.71
 -12  -1  -1    2.22    1.52
 -12  -1  -1    1.45    1.16
  12  -1   1    3.53    1.73
 -12   1   1   -2.09    1.55
  12   1  -1   -1.95    1.15
  12   1  -1   -0.70    1.41
 -12   1   1   -1.86    1.59
 -12  -1   1    1.00    1.49
 -12   1  -1    0.71    2.15
  12  -1  -1    0.66    1.28
 -12  -1   1    1.64    1.34
 -12  -1   1   -2.07    1.60
 -12   1  -1   -0.40    1.38
  12   1   1   -4.12    1.73
  12  -1  -1    1.45    1.38
 -12   2   1    3.47    1.86
 -12  -2  -1    0.64    2.18
  12  -2   1   -0.33    1.40
  12   2  -1   -1.74    1.51
 -12  -2  -1   -0.05    1.57
 -12   2   1    0.13    1.29
  12  -2   1   -0.02    1.51
 -12   2  -1    0.90    1.55
  12  -2  -1    0.03    1.37
 -12  -2   1   -0.06    1.46
 -12   2  -1    2.02    1.61
  12  -2  -1    1.62    1.54
  12   2   1   -2.80    1.78
 -12  -2   1   -0.18    1.37
 -12   3   1   -2.00    2.76
 -12   3   1    0.58    2.18
  12   3  -1    0.69    1.76
  12  -3   1    1.01    1.39
  12  -3   1    2.07    1.81
 -12  -3   1   -3.30    1.95
  12  -3  -1    0.56    1.83
  12   3   1    0.57    1.66
  12  -3  -1   -0.42    1.40
 -12   3  -1   -0.96    1.90
 -12  -3   1   -0.18    1.60
  12   4  -1    2.17    1.89
 -12   4   1    0.82    1.93
  12  -4   1   -3.46    2.22
  12  -4   1   -0.05    1.77
 -12   4   1    0.61    1.90
 -12  -4  -1    3.99    2.19
  12   4   1    3.43    2.99
 -12   4  -1    0.88    1.86
  12  -4  -1   -0.27    1.70
 -12  -4   1   -1.45    3.85
  12  -4  -1   -3.52    2.12
 -12   4  -1    0.21    1.86
 -12   0  -2    9.23    1.88
 -12   0   2    9.65    2.26
  12   0   2    9.59    2.01
 -12   0   2    9.51    2.16
 -12   0  -2    7.35    2.19
  12   0  -2   11.42    2.16
  12   0   2   10.38    2.42
  12  -1   2  112.56    6.00
 -12  -1  -2  101.24    5.54
 -12   1   2  106.68    6.12
  12  -1   2  104.21    6.43
  12   1  -2  117.81    6.42
 -12  -1  -2  107.90    6.38
 -12   1   2  103.11    6.22
  12   1  -2  109.82    5.55
 -12  -1   2  110.78    6.10
 -12  -1   2  102.65    6.18
  12   1   2   98.41    6.30
  12  -1  -2  108.64    5.44
 -12   1  -2  115.87    6.61
  12   1   2  111.90    5.65
 -12   1  -2   96.77    5.24
  12  -1  -2  119.43    6.46
 -12  -2  -2    9.88    2.34
  12  -2   2   10.33    2.23
  12  -2   2    5.24    2.04
 -12   2   2    9.07    2.26
 -12  -2  -2   10.04    2.09
  12   2  -2    8.72    2.23
  12   2  -2    9.70    1.84
 -12   2   2    7.34    2.21
 -12  -2   2   12.26    2.46
 -12   2  -2    6.13    2.14
  12  -2  -2    6.74    1.88
  12  -2  -2    8.12    2.20
  12   2   2   11.01    2.49
  12   3  -2   84.74    5.66
 -12  -3  -2   74.50    5.65
  12  -3   2   85.16    5.47
 -12   3   2   69.08    5.37
 -12   3   2   82.18    5.69
 -12  -3  -2   74.22    5.14
  12   3  -2   75.16    4.91
  12  -3   2   72.29    5.54
  12  -3  -2   75.67    5.55
 -12   3  -2   82.79    5.89
 -12  -3   2   80.49    5.36
  12  -3  -2   80.31    5.06
  12   3   2   79.31    5.87
 -12   0   3    1.23    1.68
 -12   0  -3   -0.43    1.51
  12   0  -3    0.77    1.32
  12   0   3    1.02    1.68
  12   0   3    0.40    1.48
 -12   0  -3    0.14    1.24
 -12  -1  -3   -0.55    1.54
  12   1  -3   -0.23    1.15
  12   1  -3    2.09    1.51
  12  -1   3   -1.04    1.76
  12  -1   3    3.84    1.89
 -12   1   3    2.70    1.93
 -12  -1  -3   -1.51    1.57
  12   1   3   -2.60    2.24
  12  -1  -3   -1.31    1.51
 -12   1  -3    1.17    1.28
  12   1   3    1.97    1.61
 -12   1  -3    0.59    1.45
 -12  -1   3   -3.82    2.12
 -12   2   3   -1.05    1.84
  12  -2   3   -0.92    1.66
 -12  -2  -3   -0.46    1.32
  12   2  -3   -0.12    1.16
 -12  -2  -3    1.46    2.31
  12  -2   3    0.97    1.77
  12   2  -3   -2.70    1.80
  12  -2  -3    1.26    2.12
  12  -2  -3    0.77    1.47
 -12   2  -3   -1.90    2.76
 -12   2  -3   -2.25    1.71
 -12  -2   3   -1.48    1.72
  12   2   3   -2.42    1.89
 -12  -3  -3    0.74    2.26
  12  -3   3   -0.30    1.67
  12  -3   3    0.28    2.02
 -12   3   3    1.81    2.03
  12   3  -3    0.50    1.62
  12   3  -3   -0.71    1.42
 -12  -3  -3   -0.18    1.53
  12  -3  -3   -2.00    1.66
  12   3   3    0.61    1.70
  12  -3  -3   -0.92    1.78
 -12   3  -3    0.75    1.71
 -12  -3   3   -2.73    2.59
 -12   0  -4   11.34    2.53
  12   0   4    9.51    3.06
 -12   0   4   13.82    2.72
 -12   0  -4    7.41    1.84
  12   0  -4   11.01    2.26
  12  -1   4   65.05    4.73
  12   1  -4   66.23    4.63
 -12  -1  -4   69.59    4.99
 -12   1   4   66.09    5.12
 -12  -1  -4   63.25    4.56
  12   1  -4   62.46    4.31
  12   1   4   66.48    4.67
 -12   1  -4   62.87    4.89
  12   1   4   56.16    4.85
 -12  -1   4   64.07    5.08
 -12   1  -4   60.84    4.51
  12  -1  -4   64.64    4.64
 -12   2   4    8.26    2.46
  12   2  -4    4.60    1.73
 -12  -2  -4    9.17    2.12
  12   2  -4   10.41    2.60
 -12  -2  -4    5.99    2.18
  12   2   4    7.35    2.38
  12  -2  -4   11.17    2.40
  12  -2  -4   12.77    3.09
 -13   0   0   52.59    4.64
  13   0   0   64.35    4.95
 -13   1   0   38.09    3.71
  13   1   0   34.09    3.82
 -13   1   0   37.37    3.92
  13  -1   0   38.34    3.51
 -13  -1   0   33.86    3.83
  13  -1   0   37.45    3.89
  13   0   1   -1.58    2.57
  13   0   1    0.08    1.58
 -13   0   1    0.96    1.74
 -13   0  -1    0.56    1.83
 -13   0   1   -0.77    2.50
  13   0  -1   -3.07    2.10
 -13   1   1    0.00    4.44
 -13  -1  -1    0.09    1.78
  13   1  -1   -1.16    2.27
  13  -1   1   -1.03    1.71
  13  -1   1    1.79    3.59
 -13   1   1    0.74    1.76
 -13  -1  -1   -1.56    1.85
 -13   1  -1    0.09    1.98
  13   1   1   -0.58    1.65
 -13  -1   1    1.76    2.06
  13  -1  -1   -0.86    3.45
  13  -1  -1    0.50    1.58
 -13  -1   1    2.16    1.97
   0   0   0    0.00    0.00
;
_shelx_hkl_checksum              70206
_olex2_submission_special_instructions 'No special instructions were received'
